# Supplementary material for: A highly selective receptor for zwitterionic proline
Source: Royal Society of Chemistry journal article supplement (doi:10.1039/c5ob02387d), 2015-12-08
Supplement: c5ob02387d1.pdf [file c5ob02387d1.pdf]

# A HIGHLY SELECTIVE RECEPTOR FOR ZWITTERIONIC PROLINE

Álvaro G. Temprano,<sup>[a]</sup> Laura M. Monleón,<sup>[a]</sup> Omayra H. Rubio,<sup>[a]</sup> Luis Simón Rubio,<sup>[b]</sup>  
Asunción B. Pérez,<sup>[c]</sup> Francisca Sanz<sup>[d]</sup> and Joaquín R. Morán<sup>[a]</sup>

<sup>[a]</sup> Organic Chemistry Department, Plaza de los Caídos 1-5, University of Salamanca, 37008  
Salamanca, Spain

<sup>[b]</sup> Engineering Chemistry Department, Plaza de los Caídos 1-5, University of Salamanca,  
37008 Salamanca, Spain

<sup>[c]</sup> Organic Chemistry Department, Paseo Belen nº7; University of Valladolid, 47011  
Valladolid, Spain

<sup>[d]</sup> X-ray Diffraction Service, University of Salamanca, Plaza de los Caídos 1-5, University of  
Salamanca, 37008 Salamanca, Spain

\*Corresponding author: [romoran@usal.es](mailto:romoran@usal.es)

## Table of Contents

|                                                                       |    |
|-----------------------------------------------------------------------|----|
| • Figure S1: <sup>1</sup> H NMR spectrum of compound <b>3</b> .....   | 4  |
| • Figure S2: <sup>13</sup> C NMR spectrum of compound <b>3</b> .....  | 5  |
| • Figure S3: IR spectrum of compound <b>3</b> .....                   | 6  |
| • Figure S4: HRM spectrum of spectrum of compound <b>3</b> .....      | 7  |
| • Figure S5: <sup>1</sup> H NMR spectrum of compound <b>4</b> .....   | 8  |
| • Figure S6: <sup>13</sup> C NMR spectrum of compound <b>4</b> .....  | 9  |
| • Figure S7: IR spectrum of compound <b>4</b> .....                   | 10 |
| • Figure S8: HRM spectrum of spectrum of compound <b>4</b> .....      | 11 |
| • Figure S9: <sup>1</sup> H NMR spectrum of compound <b>5</b> .....   | 12 |
| • Figure S10: <sup>13</sup> C NMR spectrum of compound <b>5</b> ..... | 13 |

|                                                                                                                                    |    |
|------------------------------------------------------------------------------------------------------------------------------------|----|
| • Figure S11: IR spectrum of compound <b>5</b> .....                                                                               | 14 |
| • Figure S12: HRM spectrum of compound <b>5</b> .....                                                                              | 15 |
| • Figure S13: <sup>1</sup> H NMR spectrum of compound <b>6</b> .....                                                               | 16 |
| • Figure S14: <sup>13</sup> C NMR spectrum of compound <b>6</b> .....                                                              | 17 |
| • Figure S15: IR spectrum of compound <b>6</b> .....                                                                               | 18 |
| • Figure S16: HRM spectrum of compound <b>6</b> .....                                                                              | 19 |
| • Figure S17: <sup>1</sup> H NMR spectrum of receptor <b>1</b> in CDCl <sub>3</sub> .....                                          | 20 |
| • Figure S18: <sup>1</sup> H NMR spectrum of receptor <b>1</b> in DMSO- <i>d</i> <sub>6</sub> .....                                | 21 |
| • Figure S19: <sup>13</sup> C NMR of receptor <b>1</b> in DMSO- <i>d</i> <sub>6</sub> .....                                        | 22 |
| • Figure S20: ROESY spectrum of receptor <b>1</b> in DMSO- <i>d</i> <sub>6</sub> .....                                             | 23 |
| • Figure S21: COSY spectrum of receptor <b>1</b> in DMSO- <i>d</i> <sub>6</sub> .....                                              | 24 |
| • Figure S22: HMQC spectrum of receptor <b>1</b> in DMSO- <i>d</i> <sub>6</sub> .....                                              | 25 |
| • Figure S23: HMBC spectrum of receptor <b>1</b> in DMSO- <i>d</i> <sub>6</sub> .....                                              | 26 |
| • Figure S24: IR spectrum of receptor <b>1</b> .....                                                                               | 27 |
| • Figure S25: HRM spectrum of receptor <b>1</b> .....                                                                              | 28 |
| • Figure S26: ORTEP diagram and X-ray crystal structure data of receptor <b>1</b> with ethyl acetate.....                          | 29 |
| • Figure S27: ORTEP diagram and X-ray crystal structure data of receptor <b>1</b> with water.....                                  | 30 |
| • Figure S28: <sup>1</sup> H NMR spectrum of receptor <b>1</b> with tetrabutylammonium acetate in CDCl <sub>3</sub> .....          | 31 |
| • Figure S29: <sup>1</sup> H NMR spectrum of receptor <b>1</b> with <i>L</i> -proline in CDCl <sub>3</sub> .....                   | 32 |
| • Figure S30: COSY spectrum of receptor <b>1</b> with <i>L</i> -proline in CDCl <sub>3</sub> .....                                 | 33 |
| • Figure S31: ROESY spectrum of receptor <b>1</b> with <i>L</i> -proline in CDCl <sub>3</sub> .....                                | 34 |
| • Figure S32: <sup>1</sup> H NMR spectrum of strong complex of receptor <b>1</b> with <i>L</i> -proline in CDCl <sub>3</sub> ..... | 35 |
| • Figure S33: COSY spectrum of strong complex of receptor <b>1</b> with <i>L</i> -proline in CDCl <sub>3</sub> .....               | 36 |
| • Figure S34: ROESY spectrum of strong complex of receptor <b>1</b> with <i>L</i> -proline in CDCl <sub>3</sub> .....              | 37 |

- Figure S35: <sup>1</sup>H NMR spectrum of weak complex of receptor **1** with *L*-proline  
in CDCl<sub>3</sub>..... 38
- Figure S36: COSY spectrum of weak complex of receptor **1** with *L*-proline  
in CDCl<sub>3</sub>..... 39
- Figure S37: ROESY spectrum of weak complex of receptor **1** with *L*-proline  
in CDCl<sub>3</sub>..... 40
- Figure S38: <sup>1</sup>H NMR spectrum of receptor **1** with *D+L*-proline in CDCl<sub>3</sub>..... 41
- Figure S39: Movement for the urea and the amide NHs of the receptor **1** by  
formation of diastereomeric associates with *L*-proline..... 42
- Figure S40: <sup>1</sup>H NMR spectrum of racemic receptor **1** and a saturated aqueous  
solution of *D+L*-proline (a) and *L*-proline (b) in CDCl<sub>3</sub>..... 43
- Figure S41: HPLC of extraction of *L*-proline with the receptor **1**..... 44
- Figure S42: HPLC of extraction of a mixture of amino acids with  
the receptor **1**..... 45
- Figure S43: Modelling studies of associates between receptor **1** and *L*-proline..... 46

Figure S1.  $^1\text{H}$  NMR spectrum of compound **3** (200 MHz,  $\text{CDCl}_3$ ).

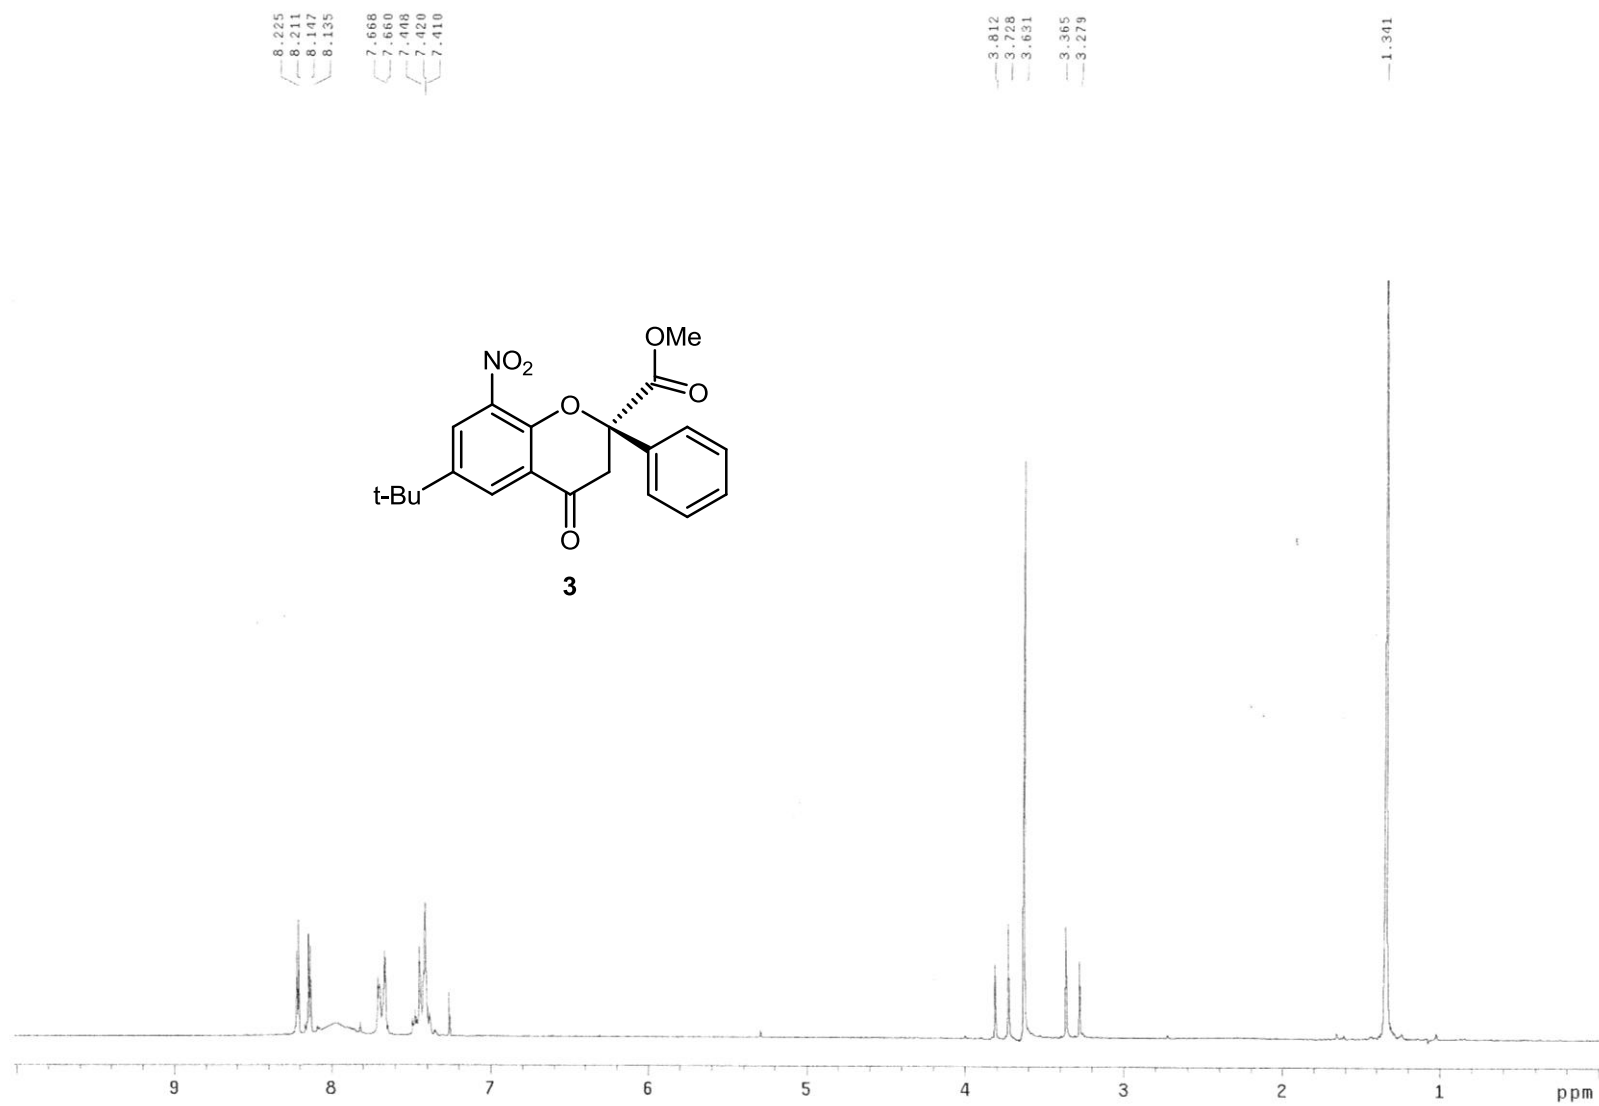

Figure S2.  $^{13}\text{C}$  NMR spectrum of compound **3** (50 MHz,  $\text{CDCl}_3$ ).

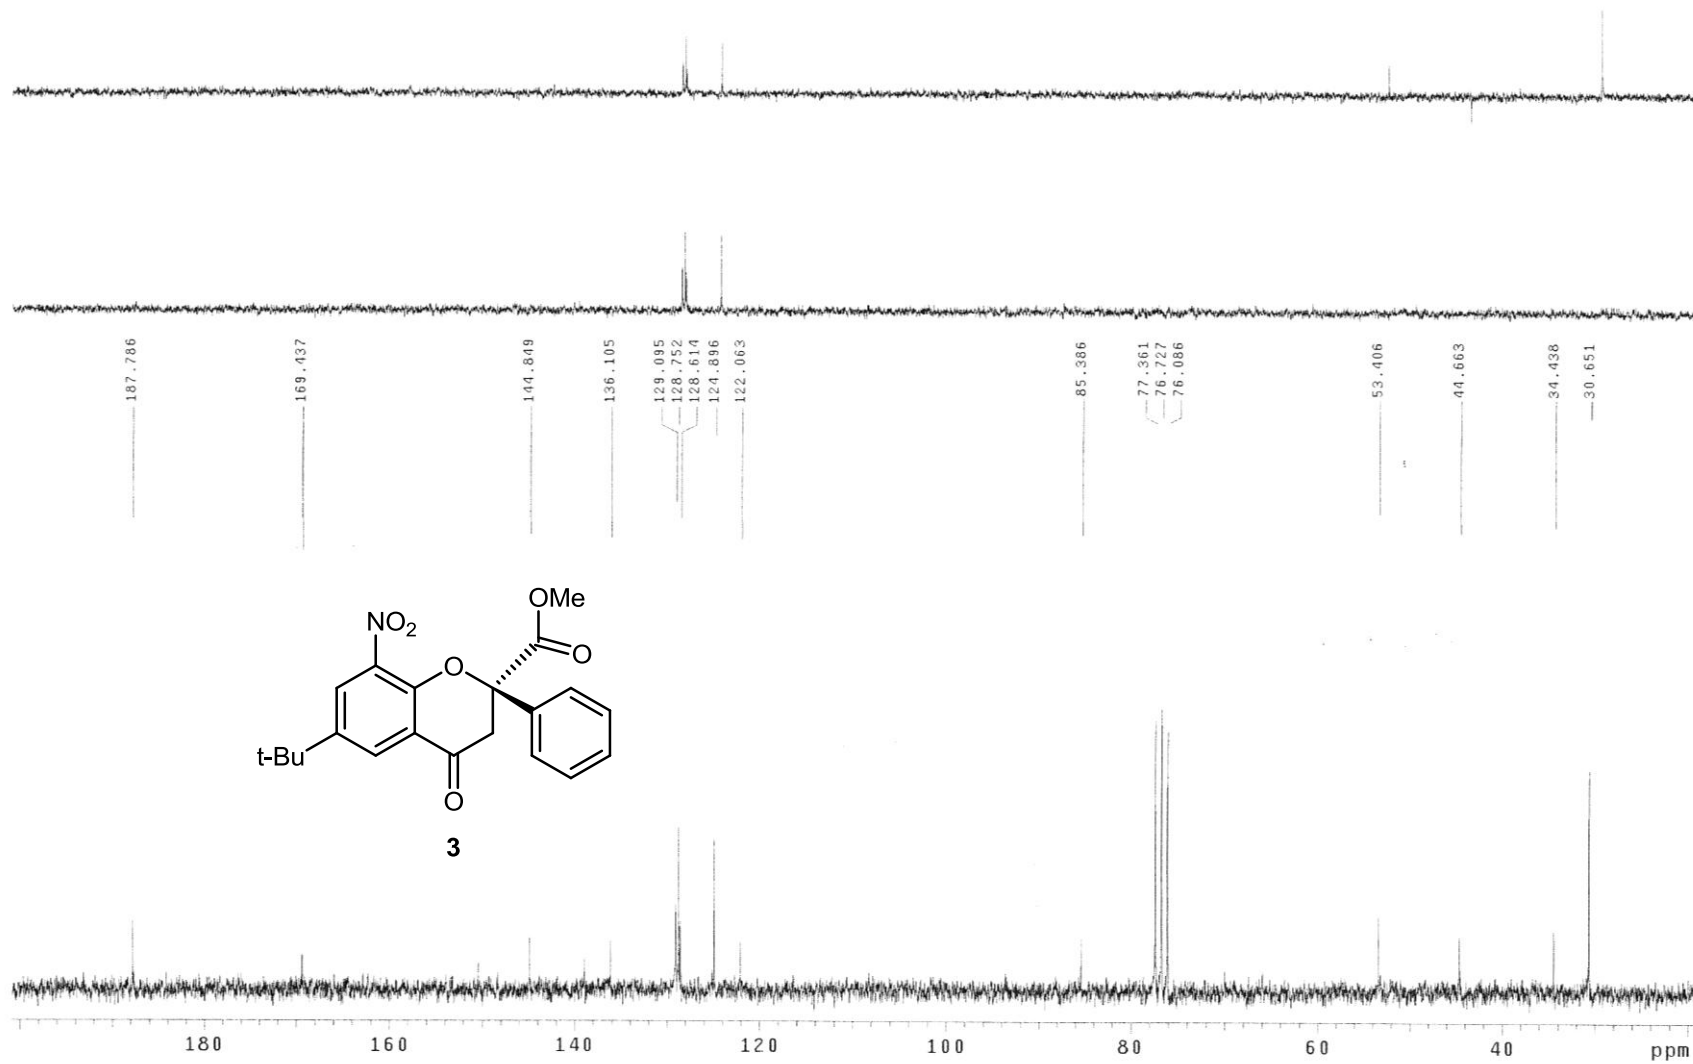

Figure S3. IR spectrum of compound 3 (nujol).

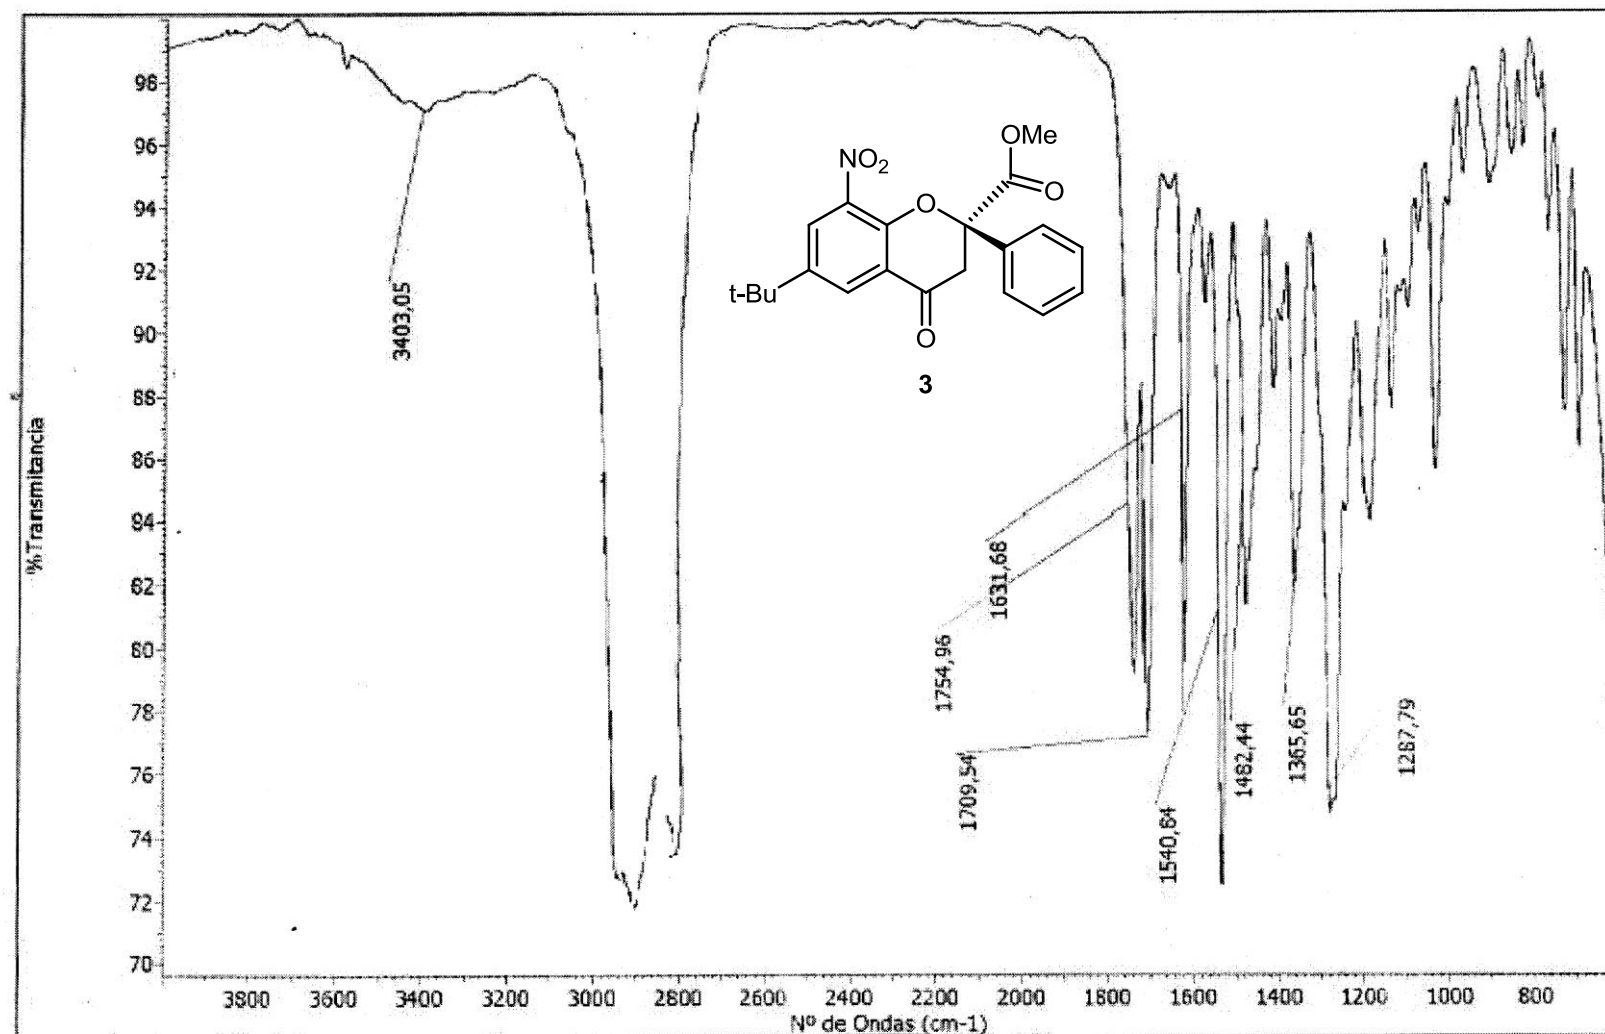

Figure S4. HRM spectrum of compound 3 (ESI-QTOF).

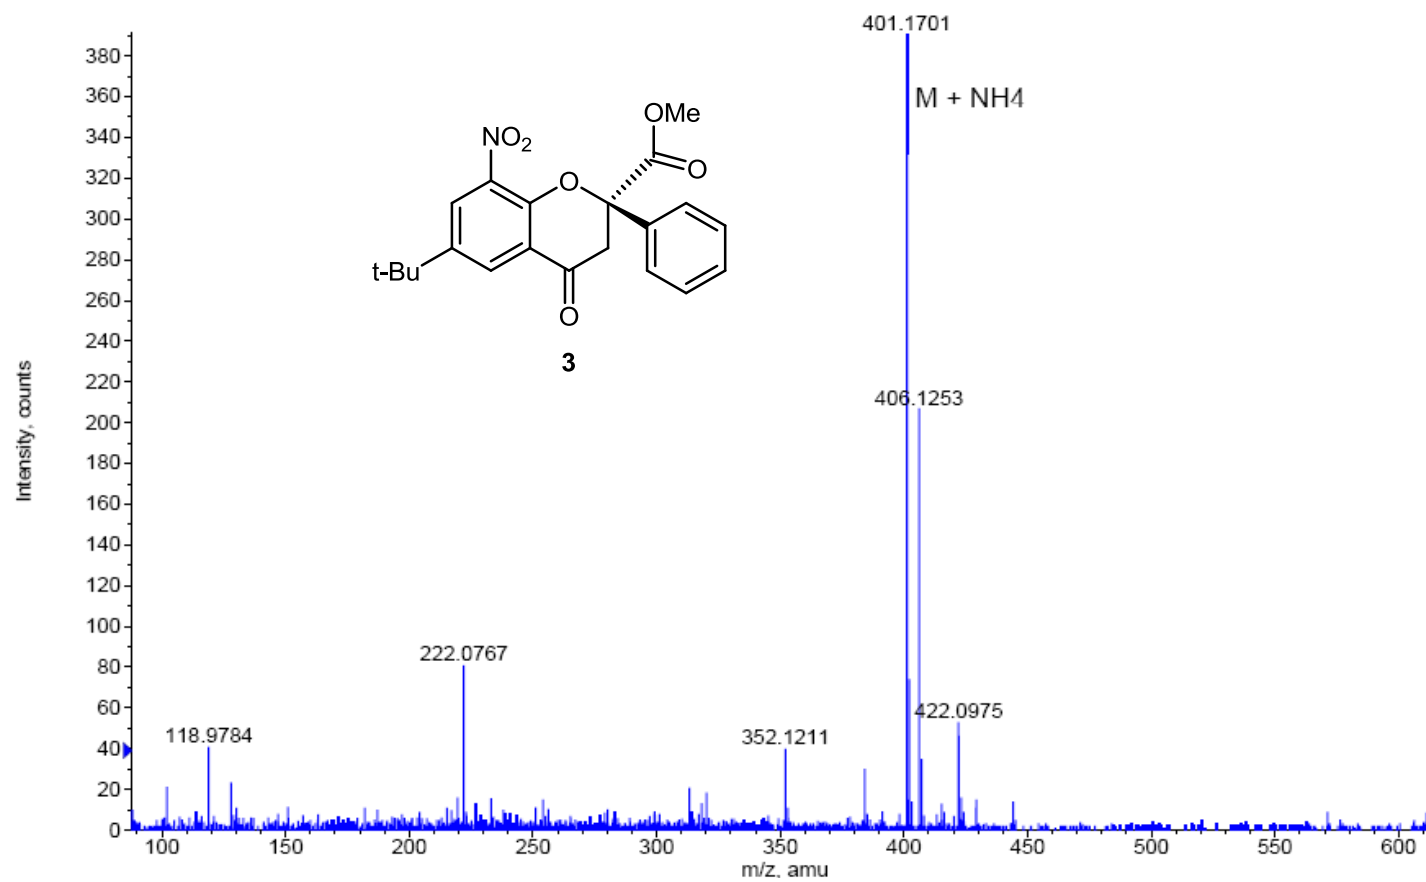

Figure S5.  $^1\text{H}$  NMR spectrum of compound 4 (200 MHz,  $\text{CDCl}_3$ ).

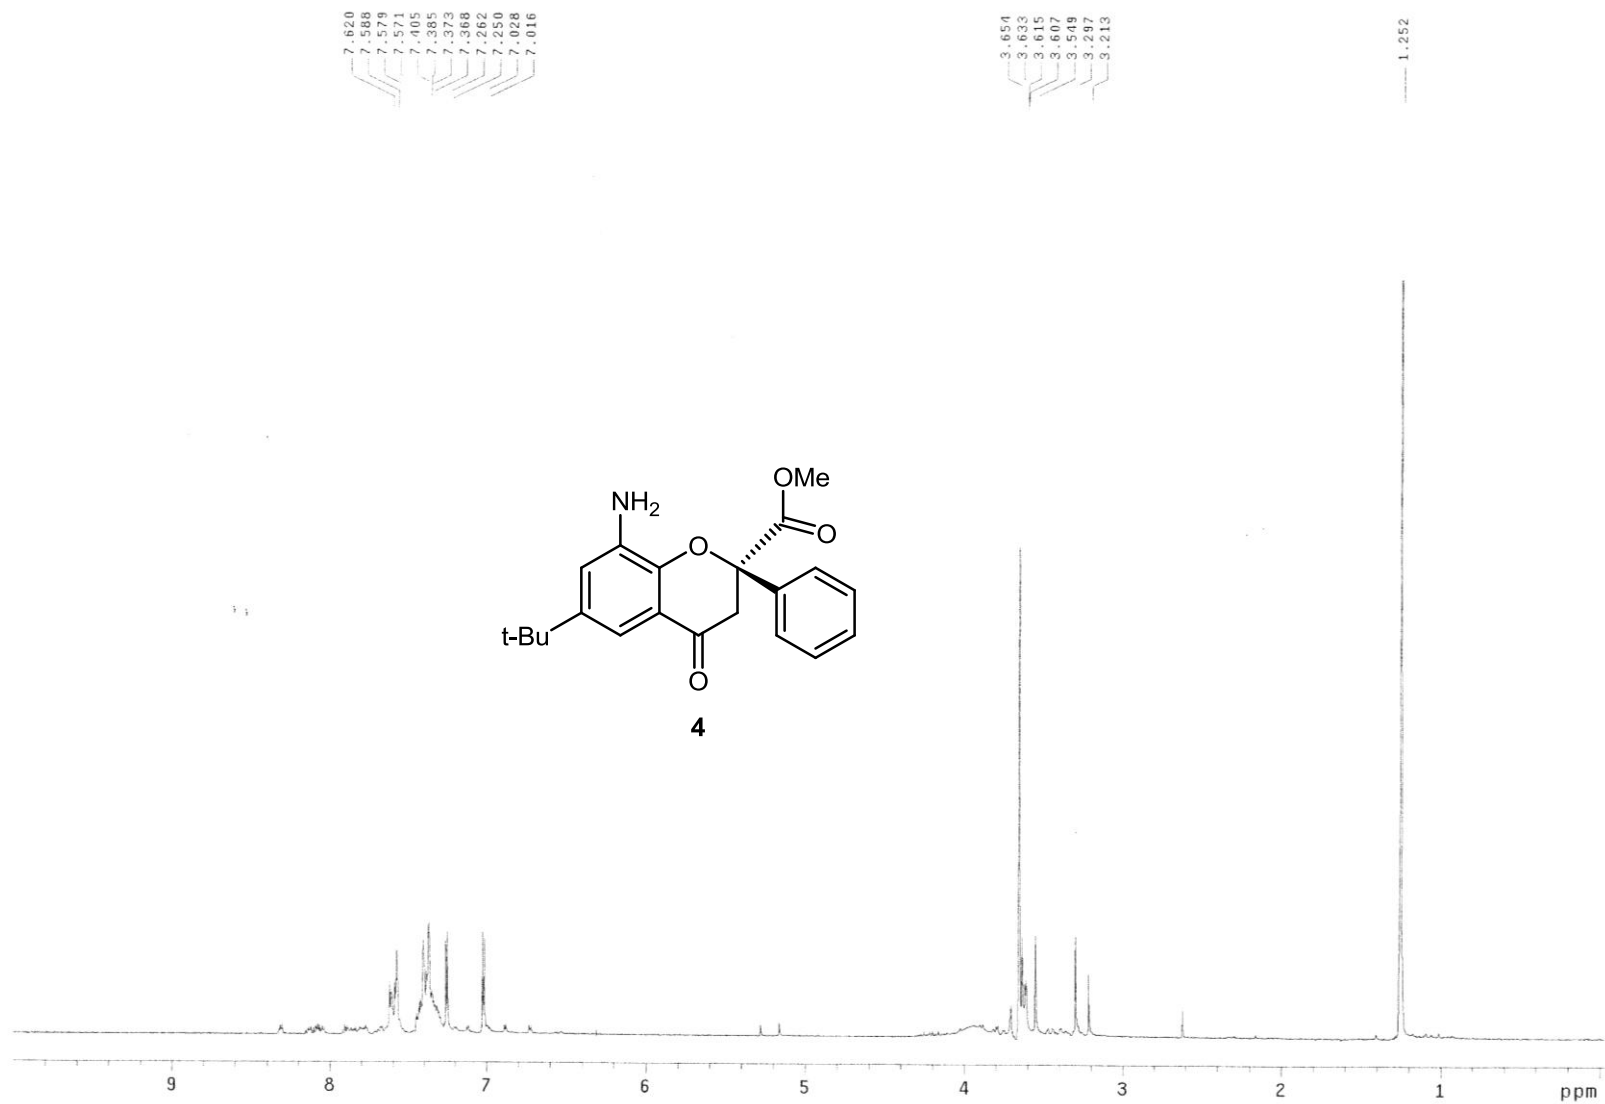



Figure S6.  $^{13}\text{C}$  NMR spectrum of compound 4 (50 MHz,  $\text{CDCl}_3$ ).

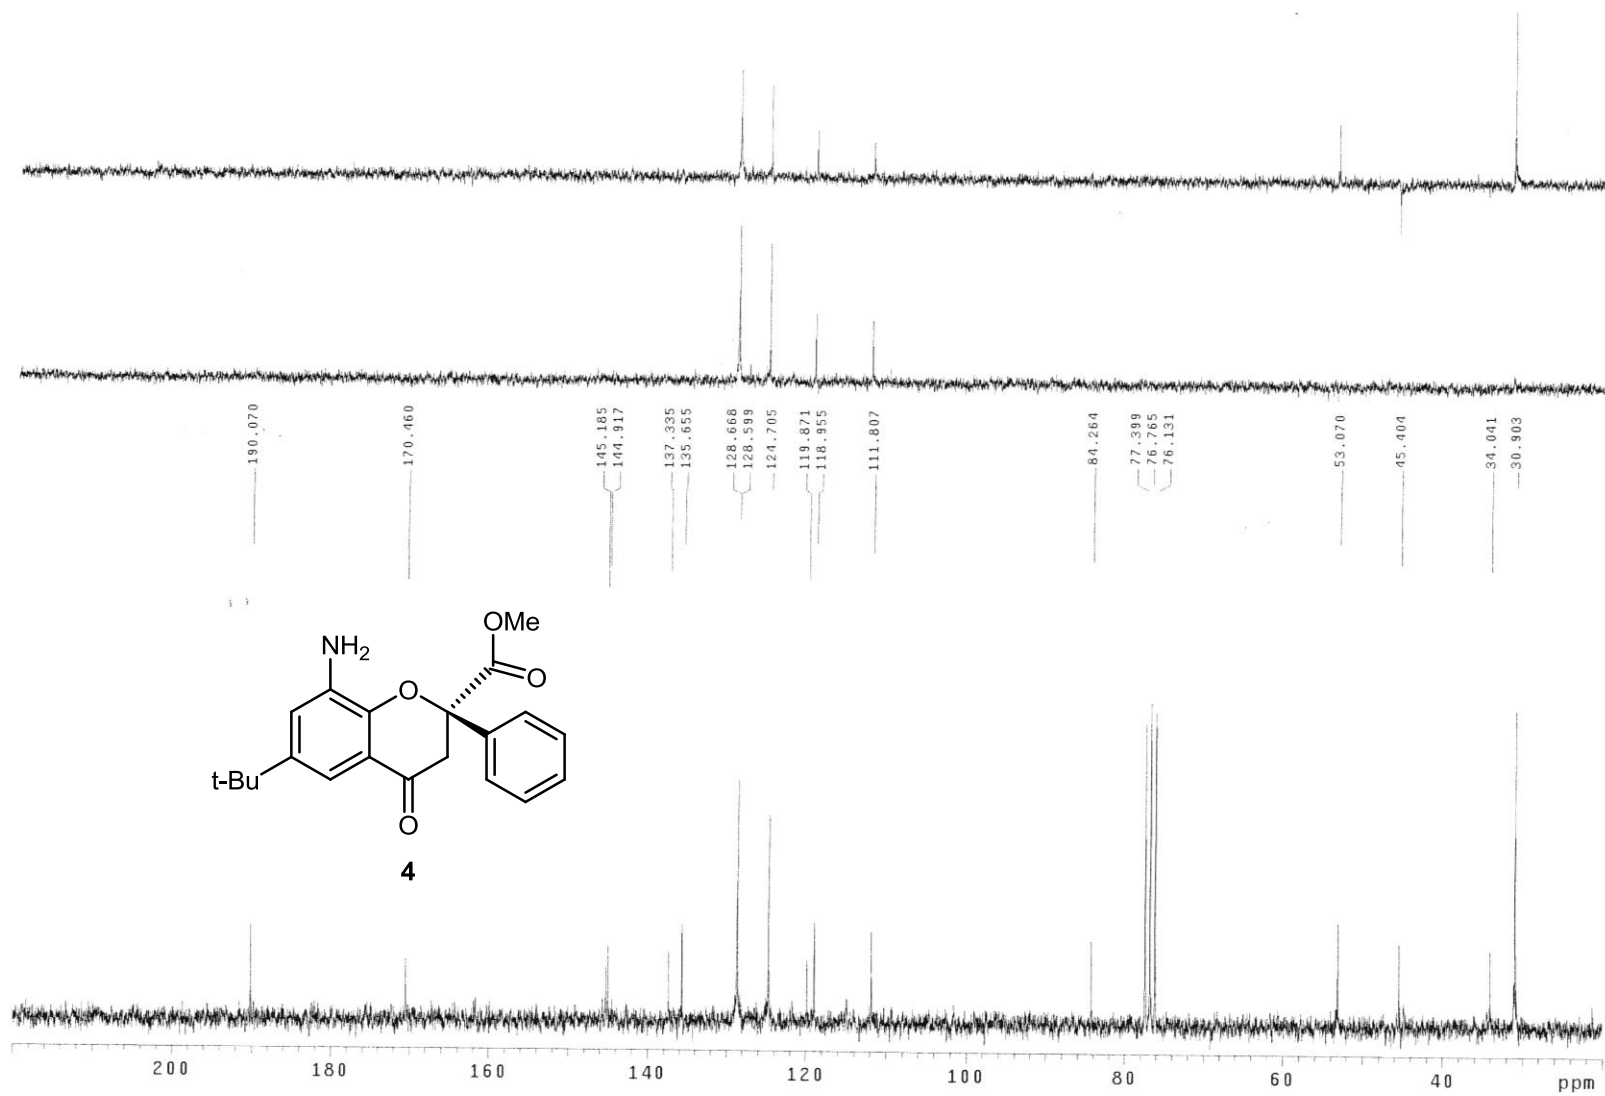

Figure S7. IR spectrum of compound 4 (nujol).

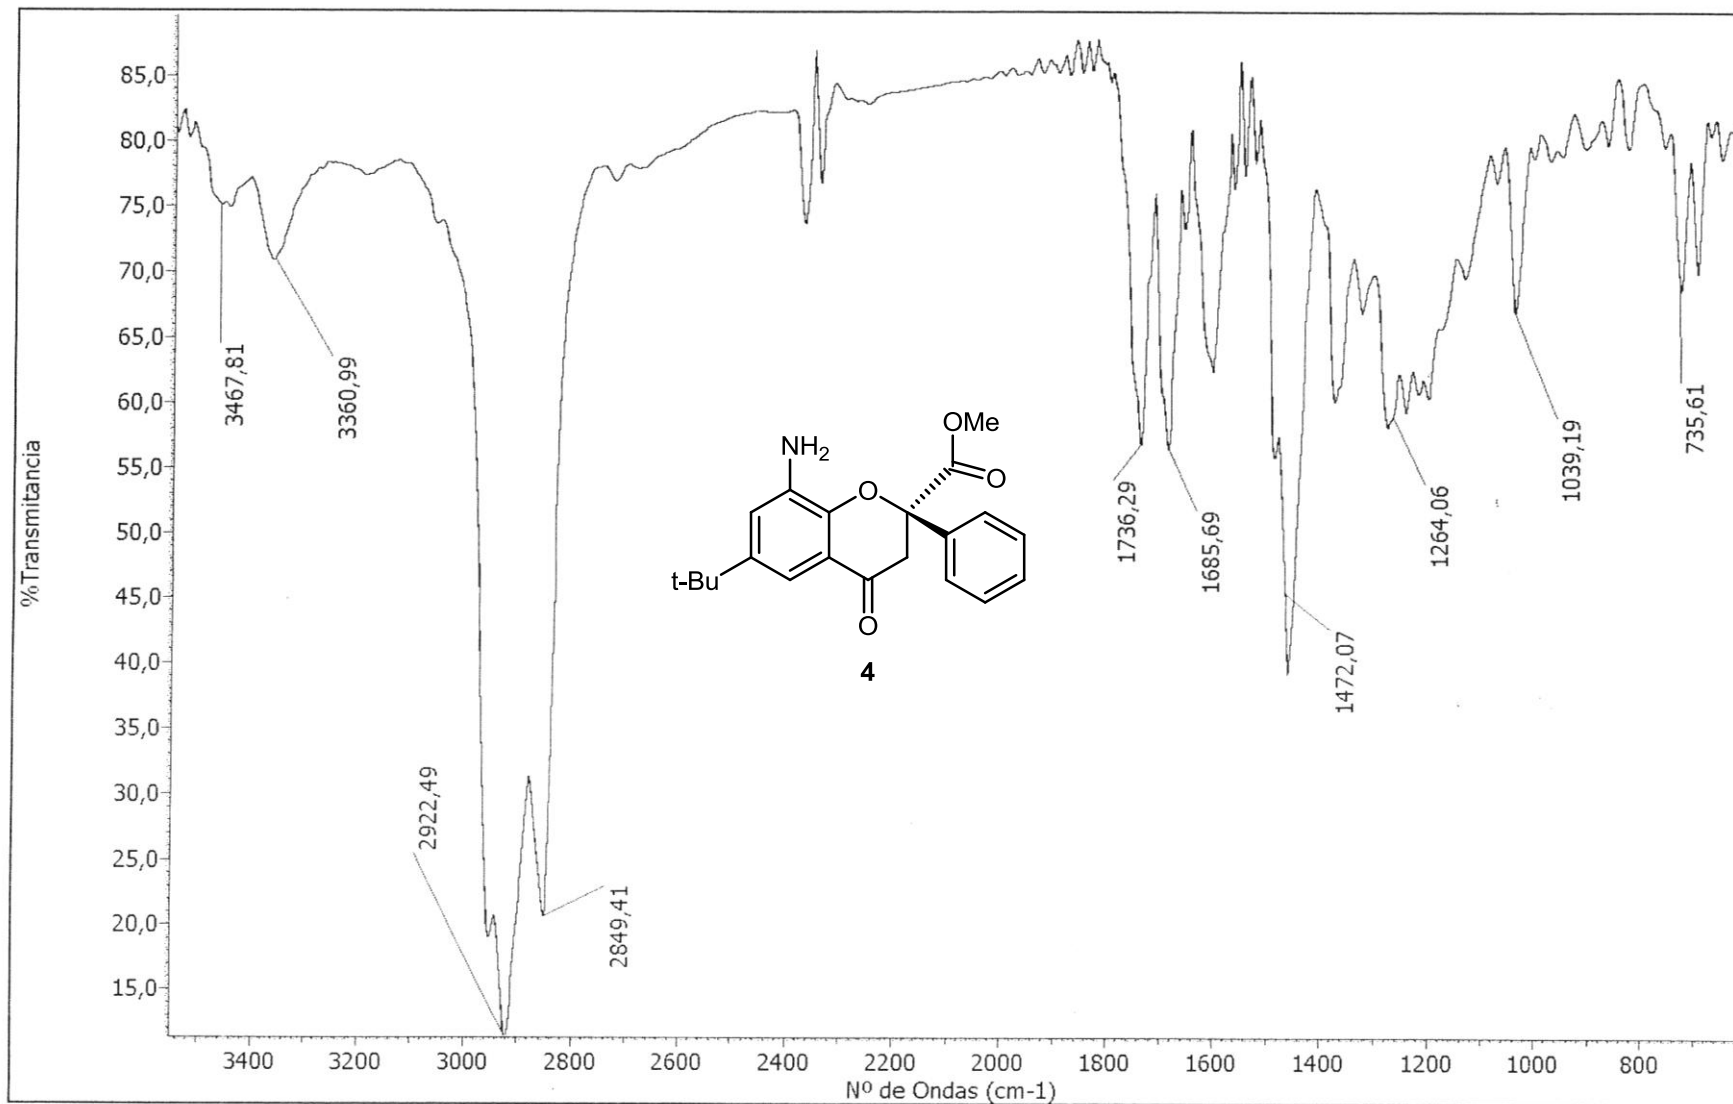

Figure S8. HRM spectrum of compound 4 (ESI-QTOF).

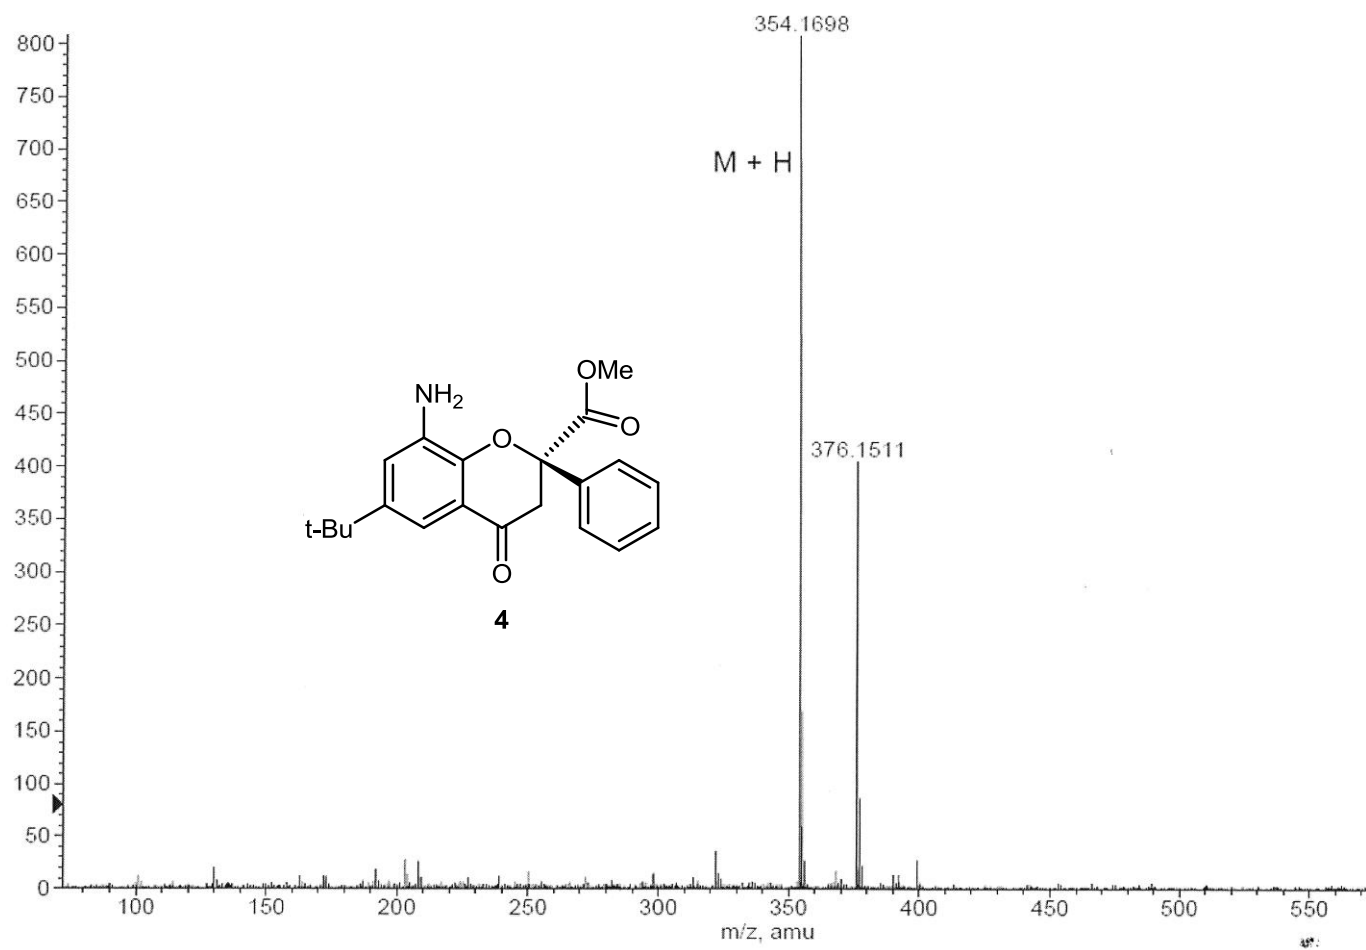

Figure S9.  $^1\text{H}$  NMR spectrum of compound 5 (200 MHz,  $\text{CDCl}_3$ ).

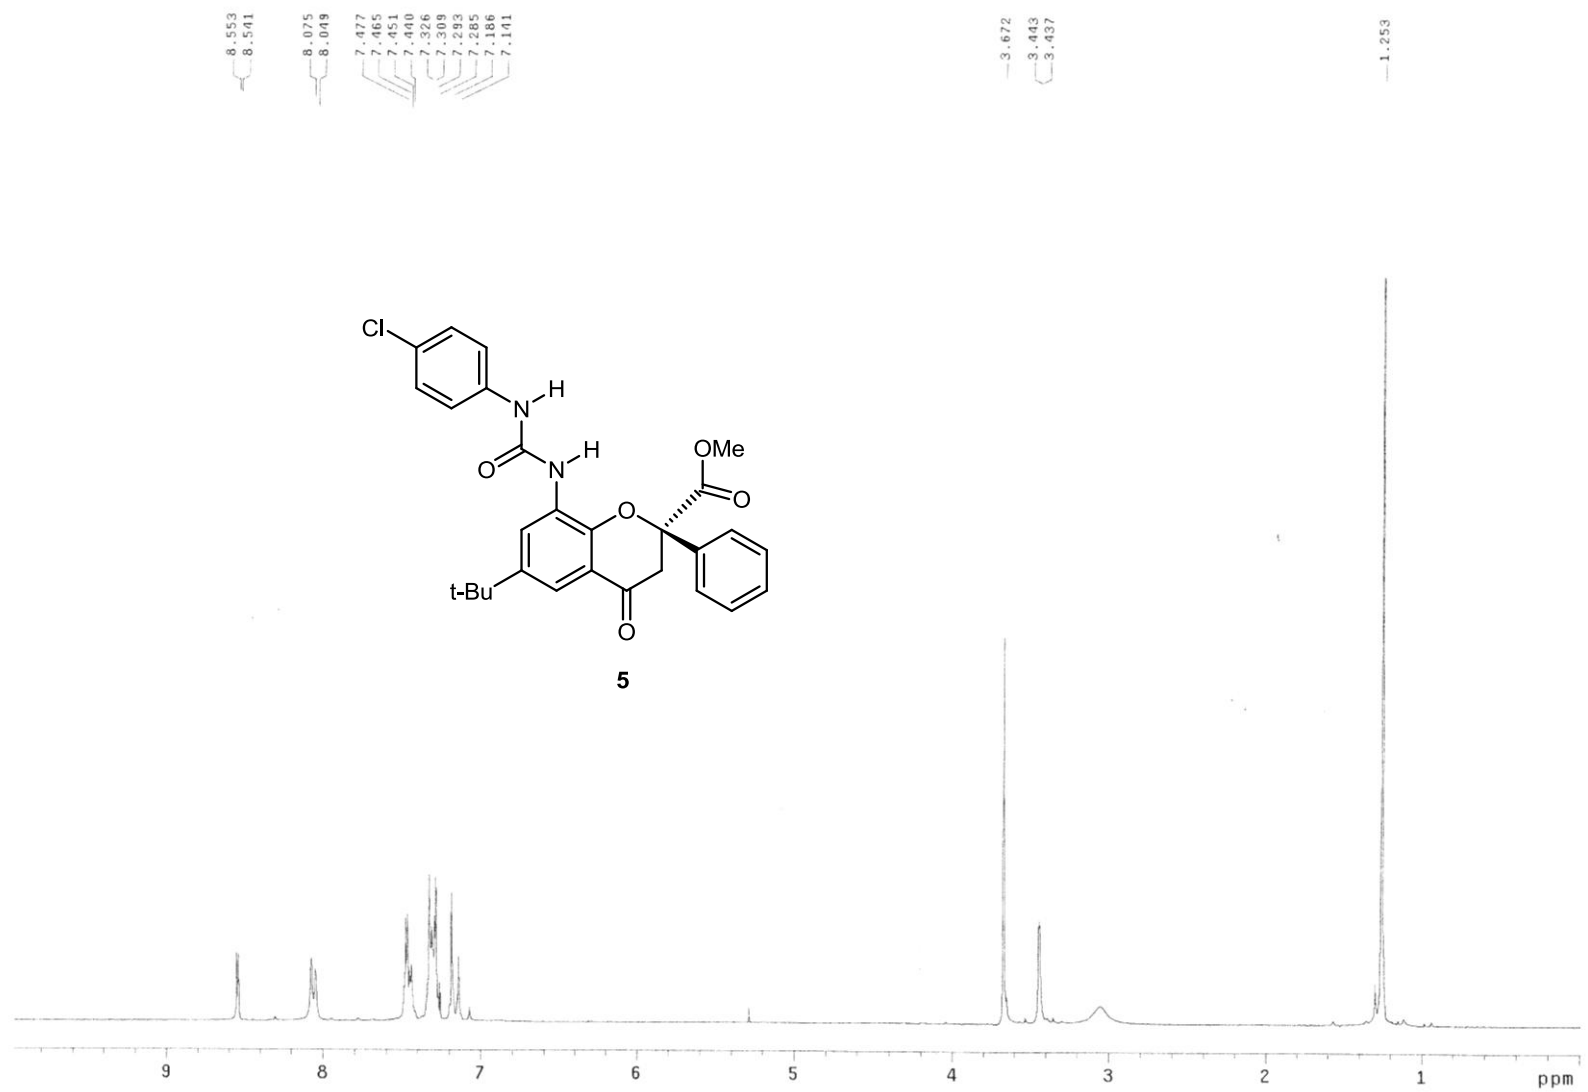

Figure S10.  $^{13}\text{C}$  NMR spectrum of compound **5** (50 MHz,  $\text{CDCl}_3$ ).

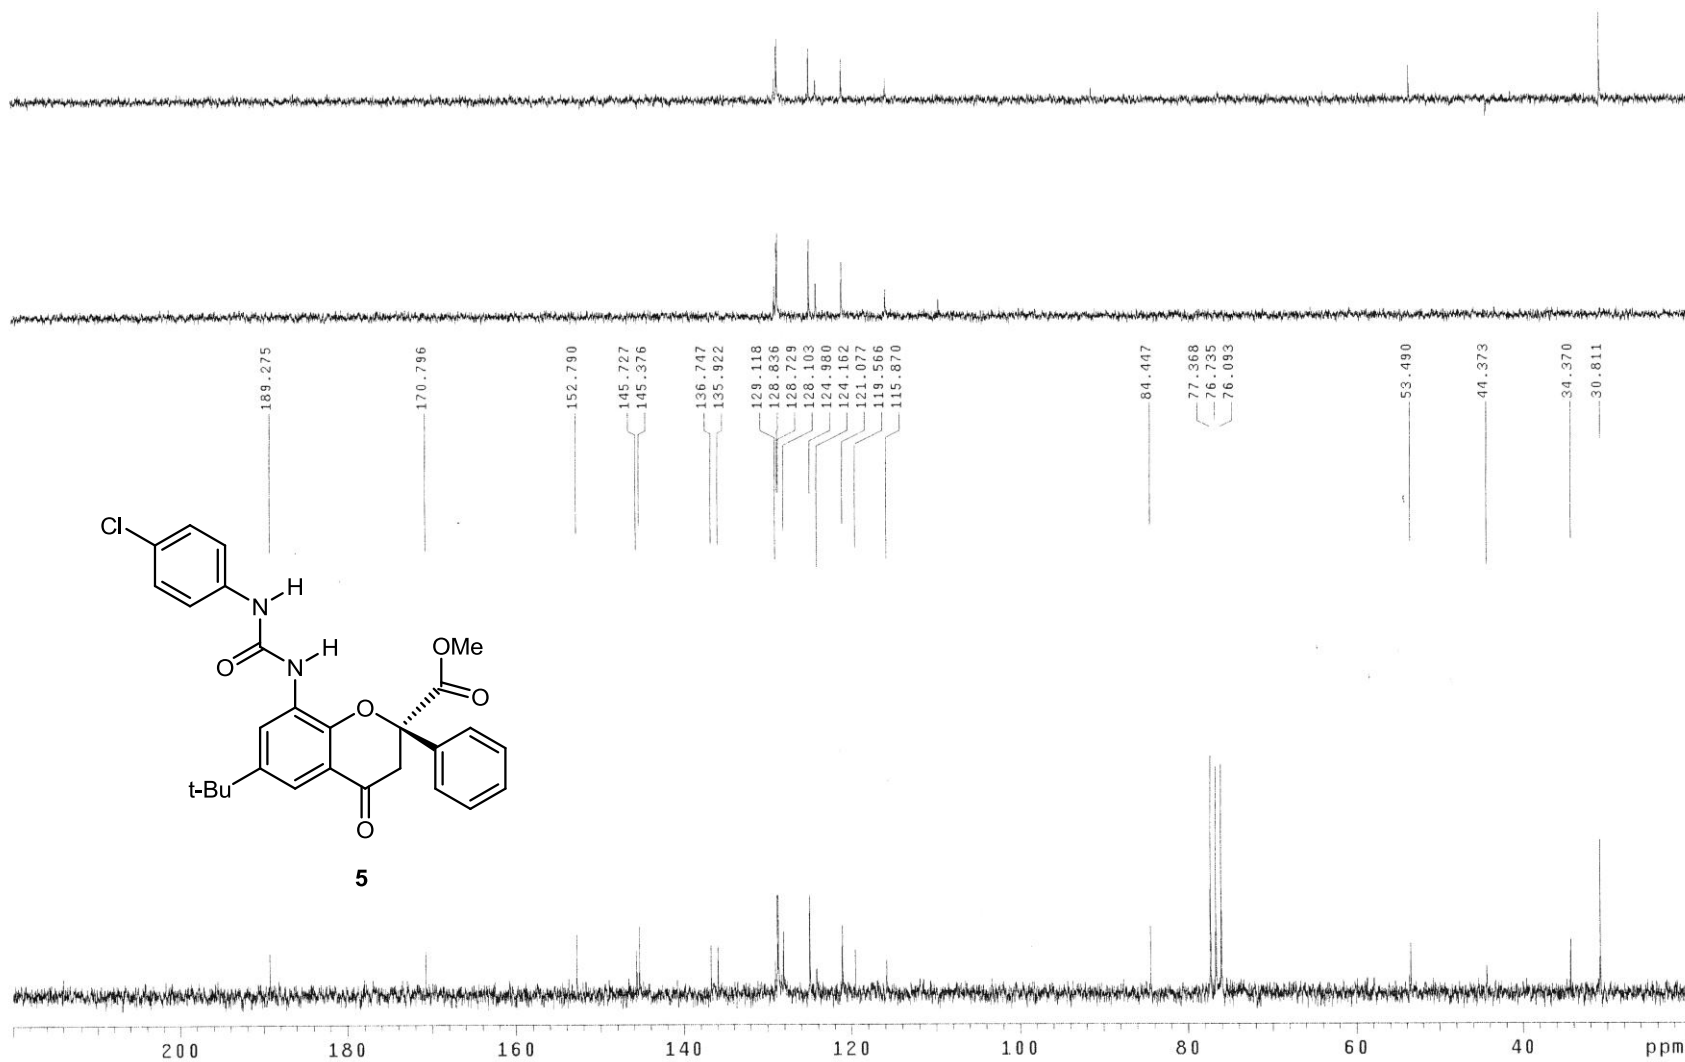

Figure S11. IR spectrum of compound 5 (nujol).

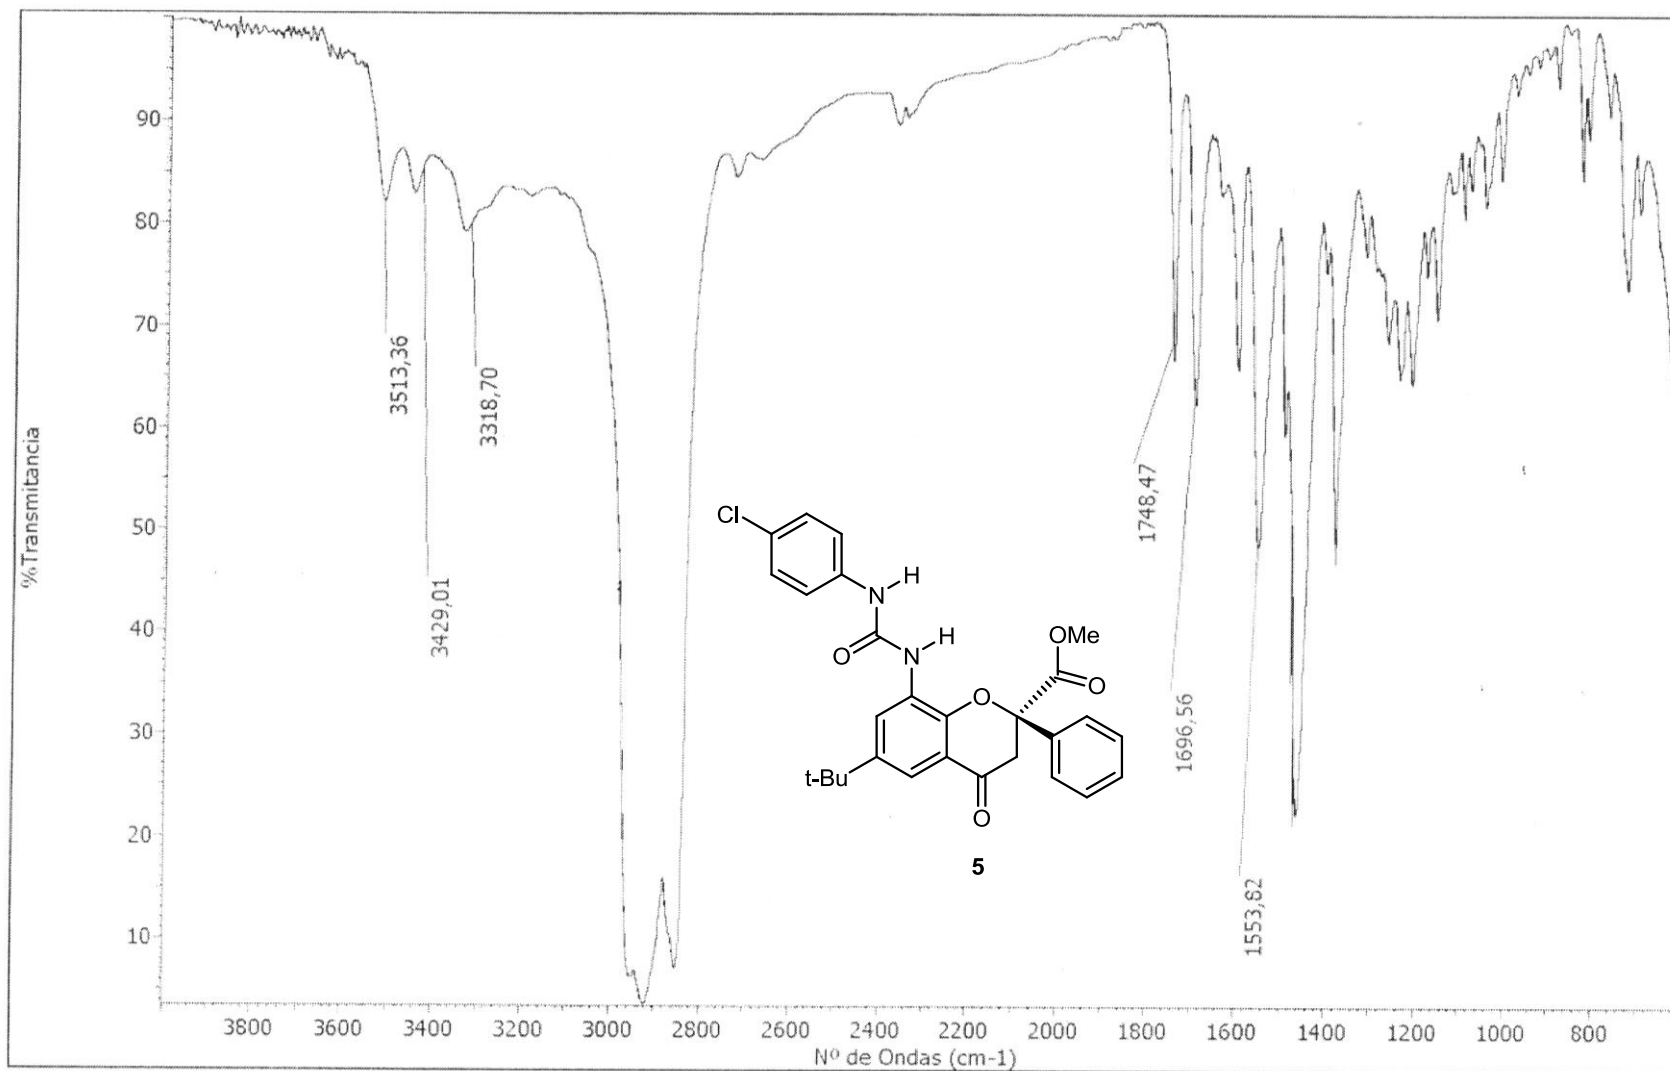

Figure S12. HRM spectrum of compound 5 (ESI-QTOF).

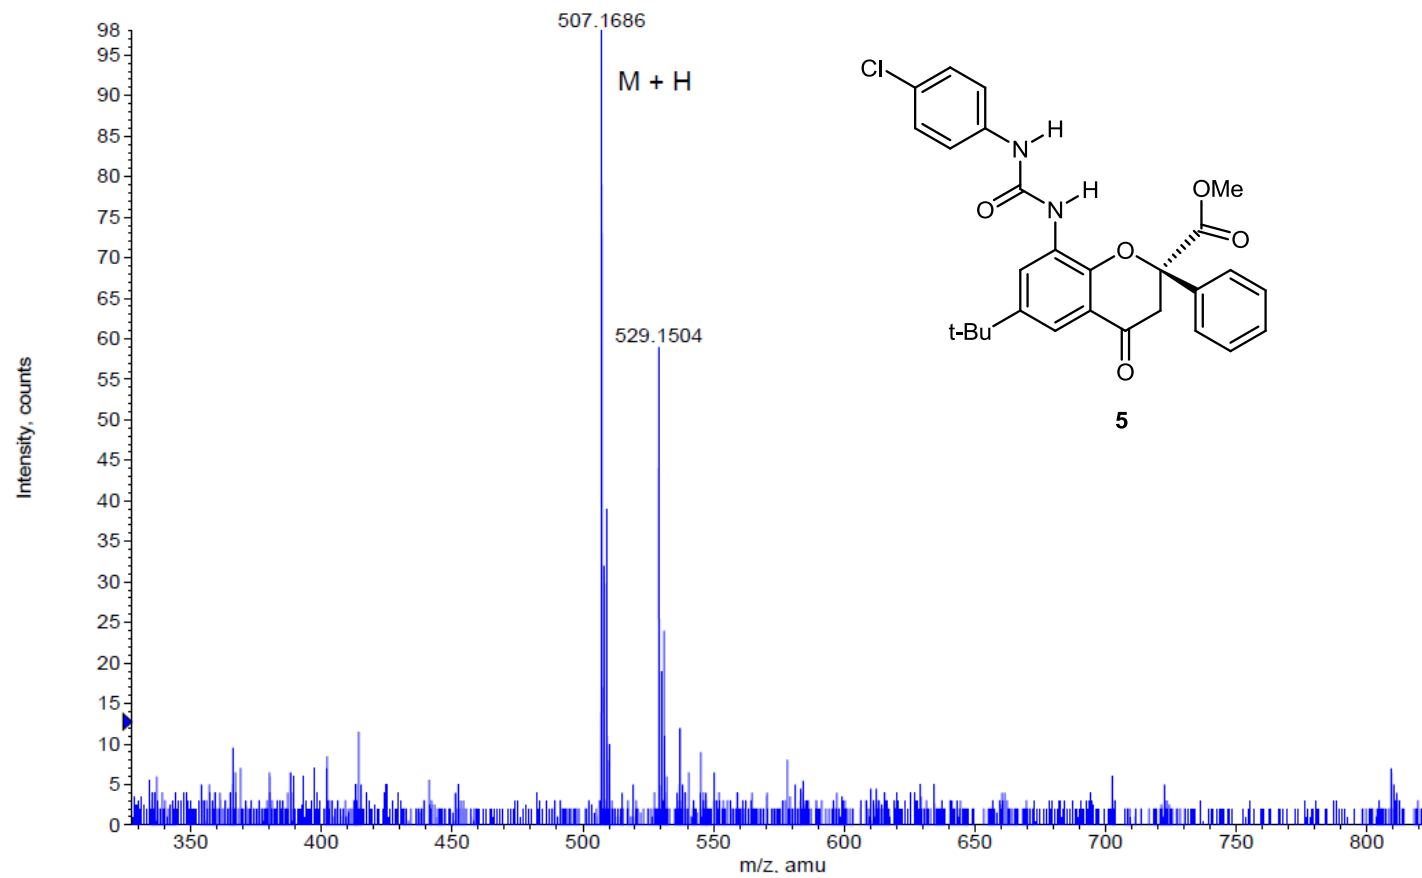

Figure S13.  $^1\text{H}$  NMR spectrum of compound 6 (200 MHz,  $\text{CDCl}_3$ ).

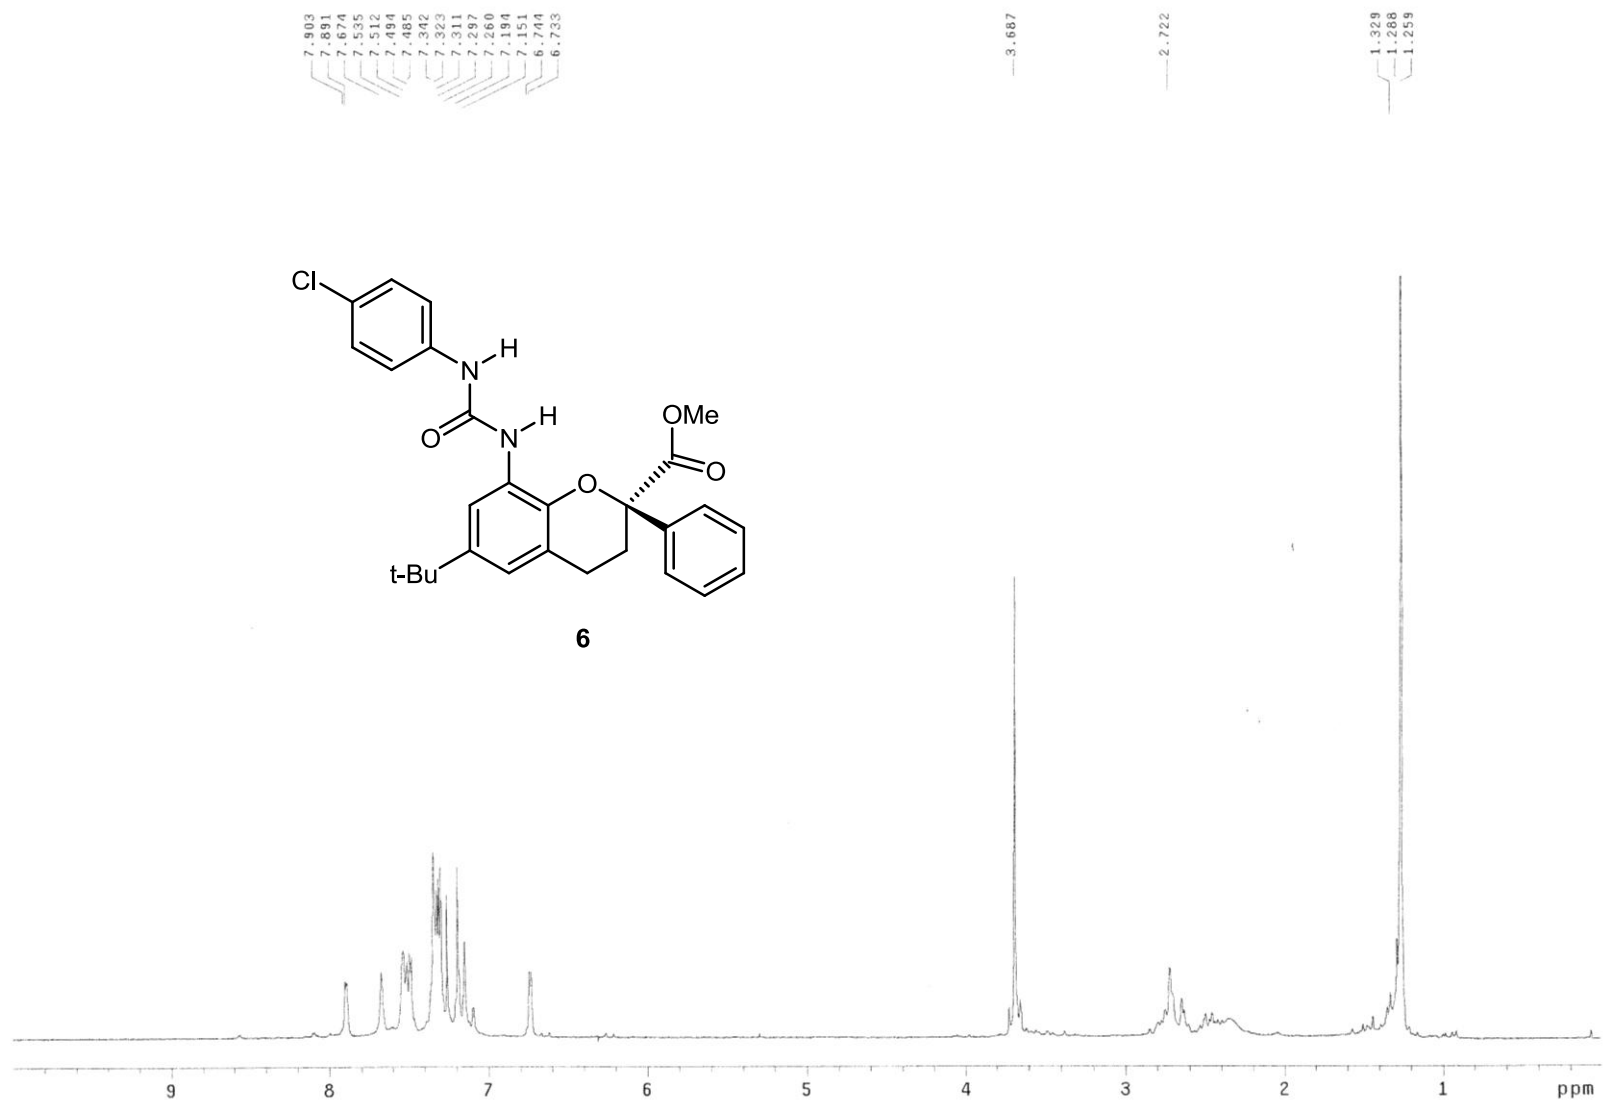



Figure S14.  $^{13}\text{C}$  NMR spectrum of compound 6 (50 MHz,  $\text{CDCl}_3$ ).

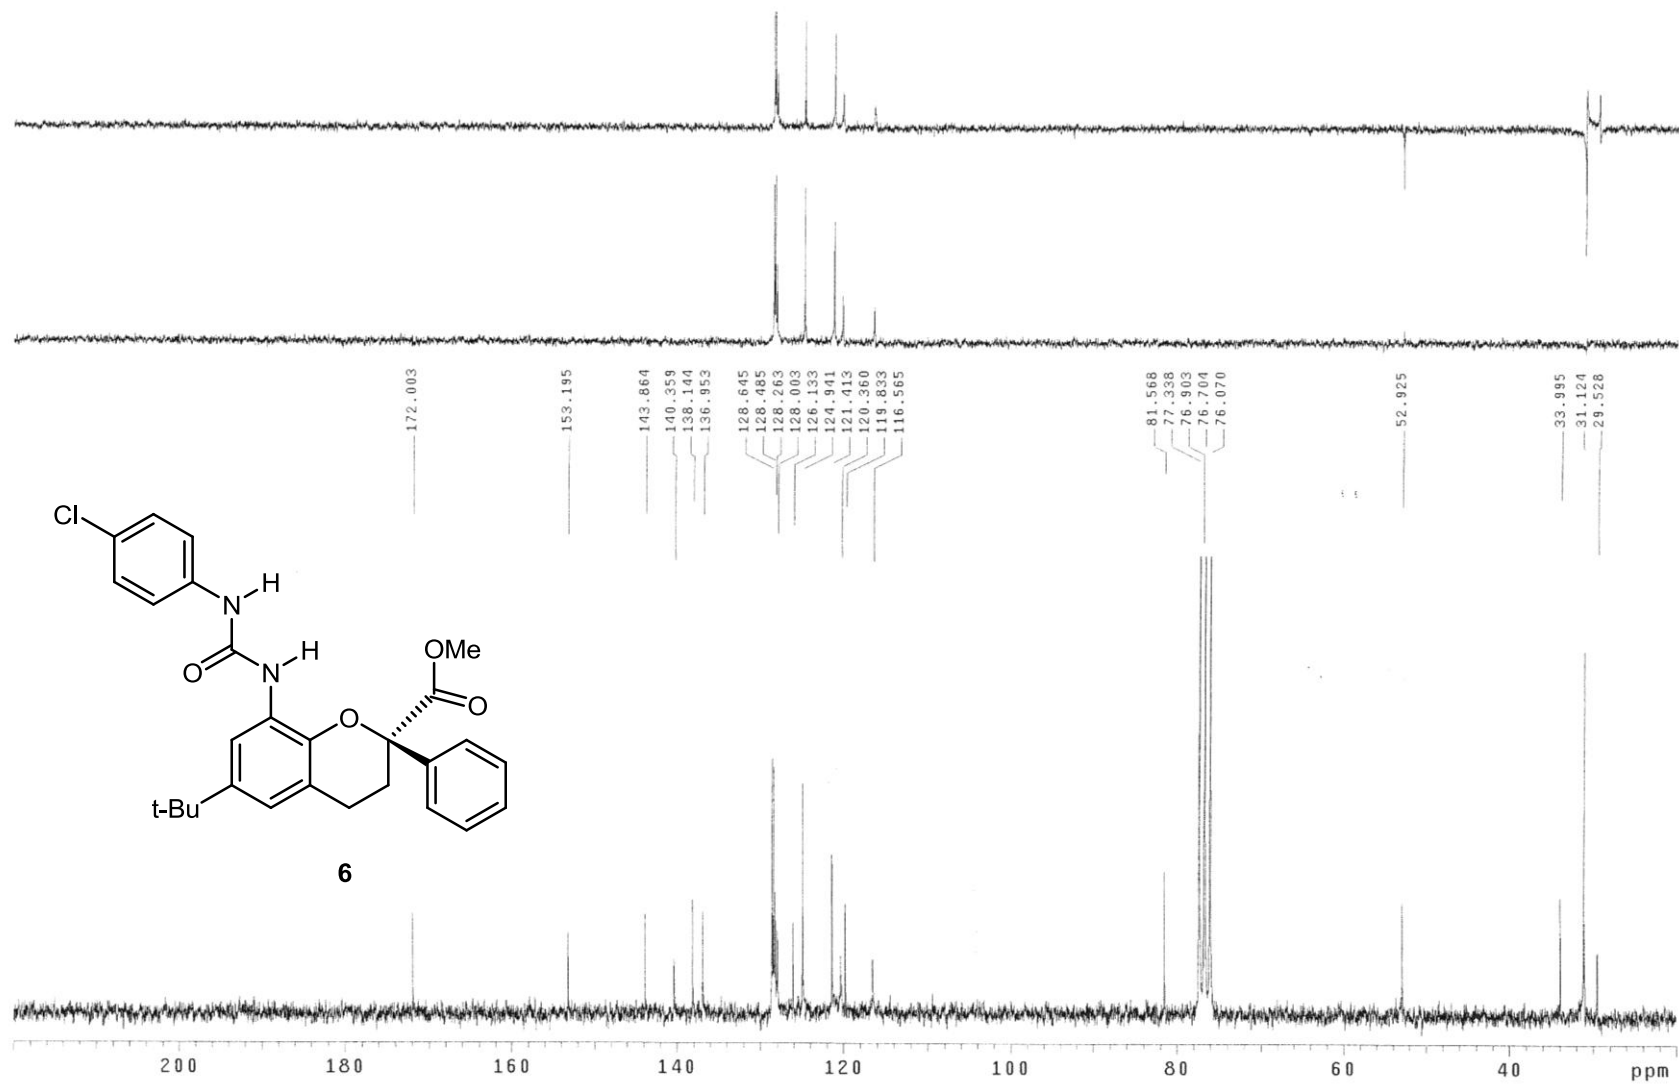

Figure S15. IR spectrum of compound 6 (nujol).

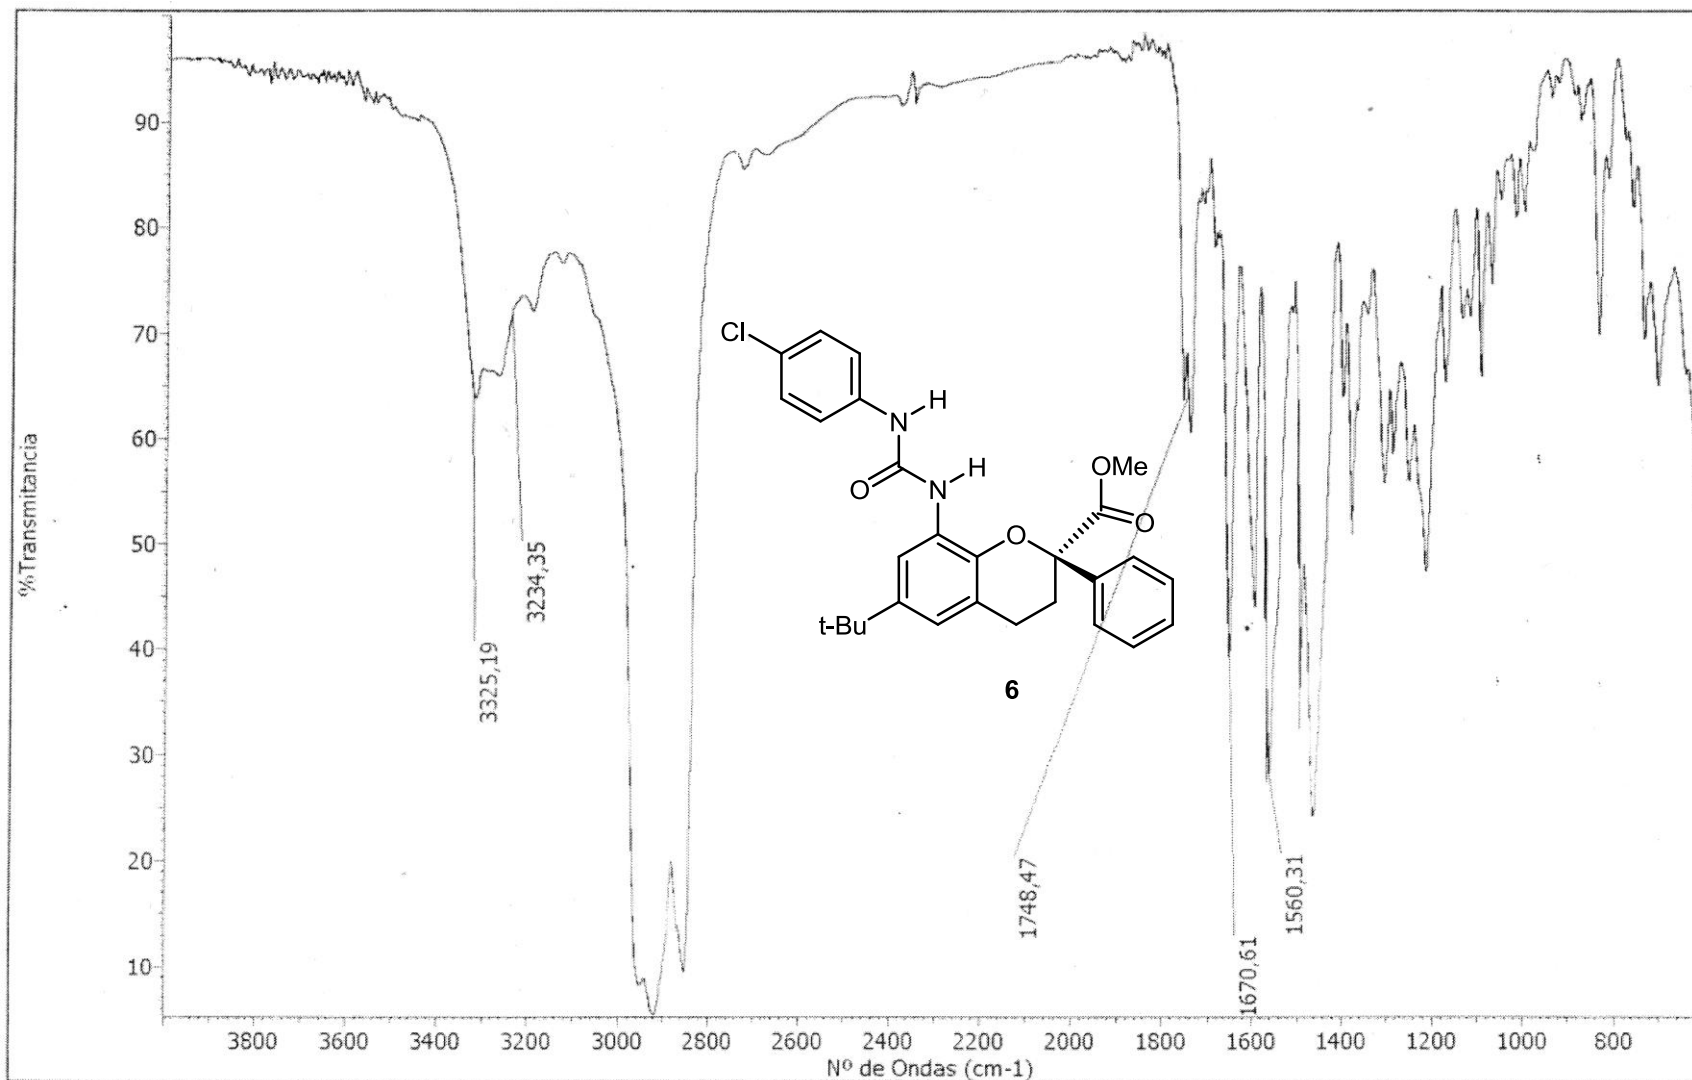

Figure S16. HRM spectrum of compound 6 (ESI-QTOF).

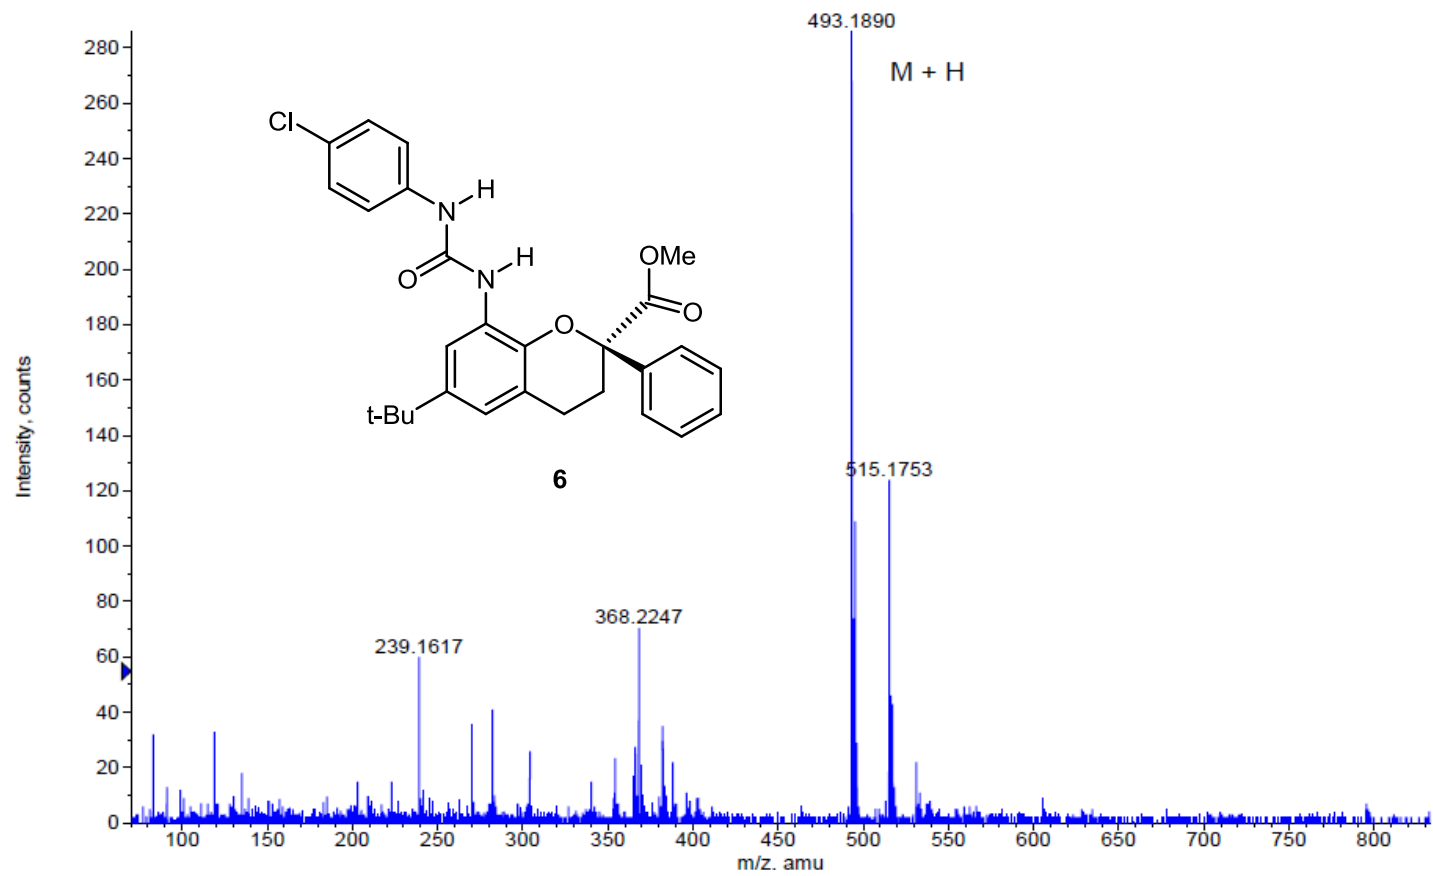

Figure S17.  $^1\text{H}$  NMR spectrum of receptor 1. (200 MHz,  $\text{CDCl}_3$ ).

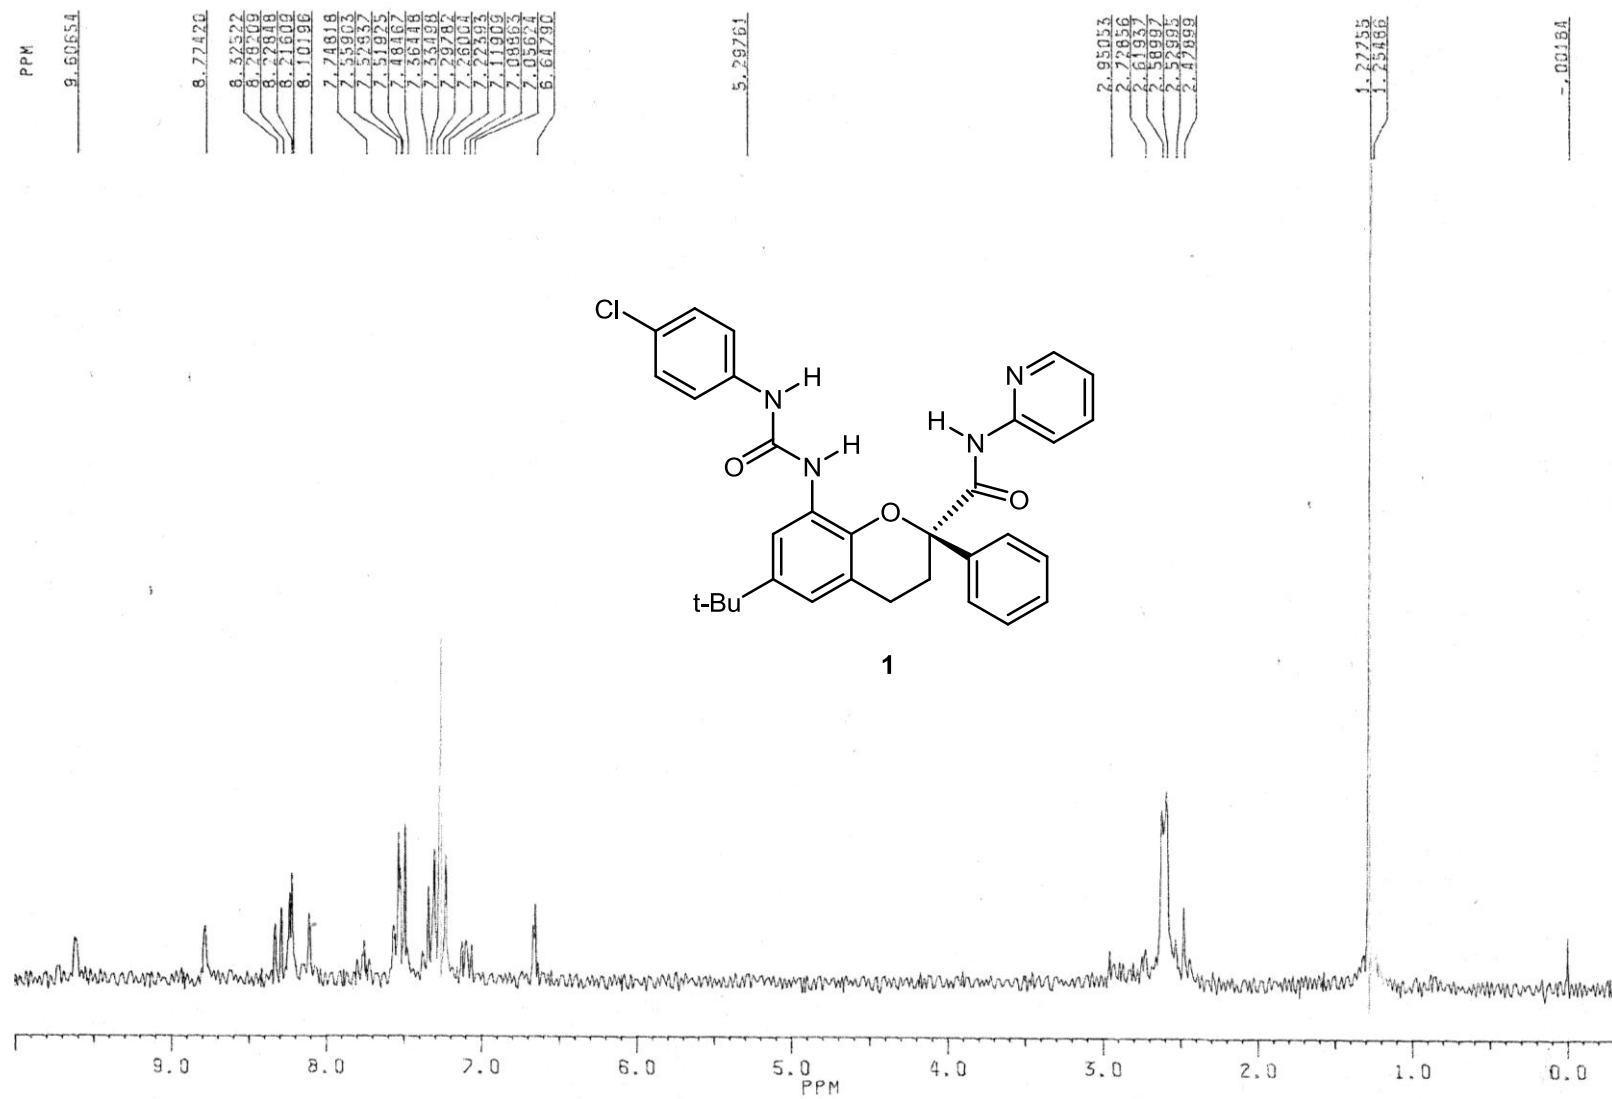

Figure S18.  $^1\text{H}$  NMR spectrum of receptor 1. (400 MHz,  $\text{DMSO-}d_6$ ).

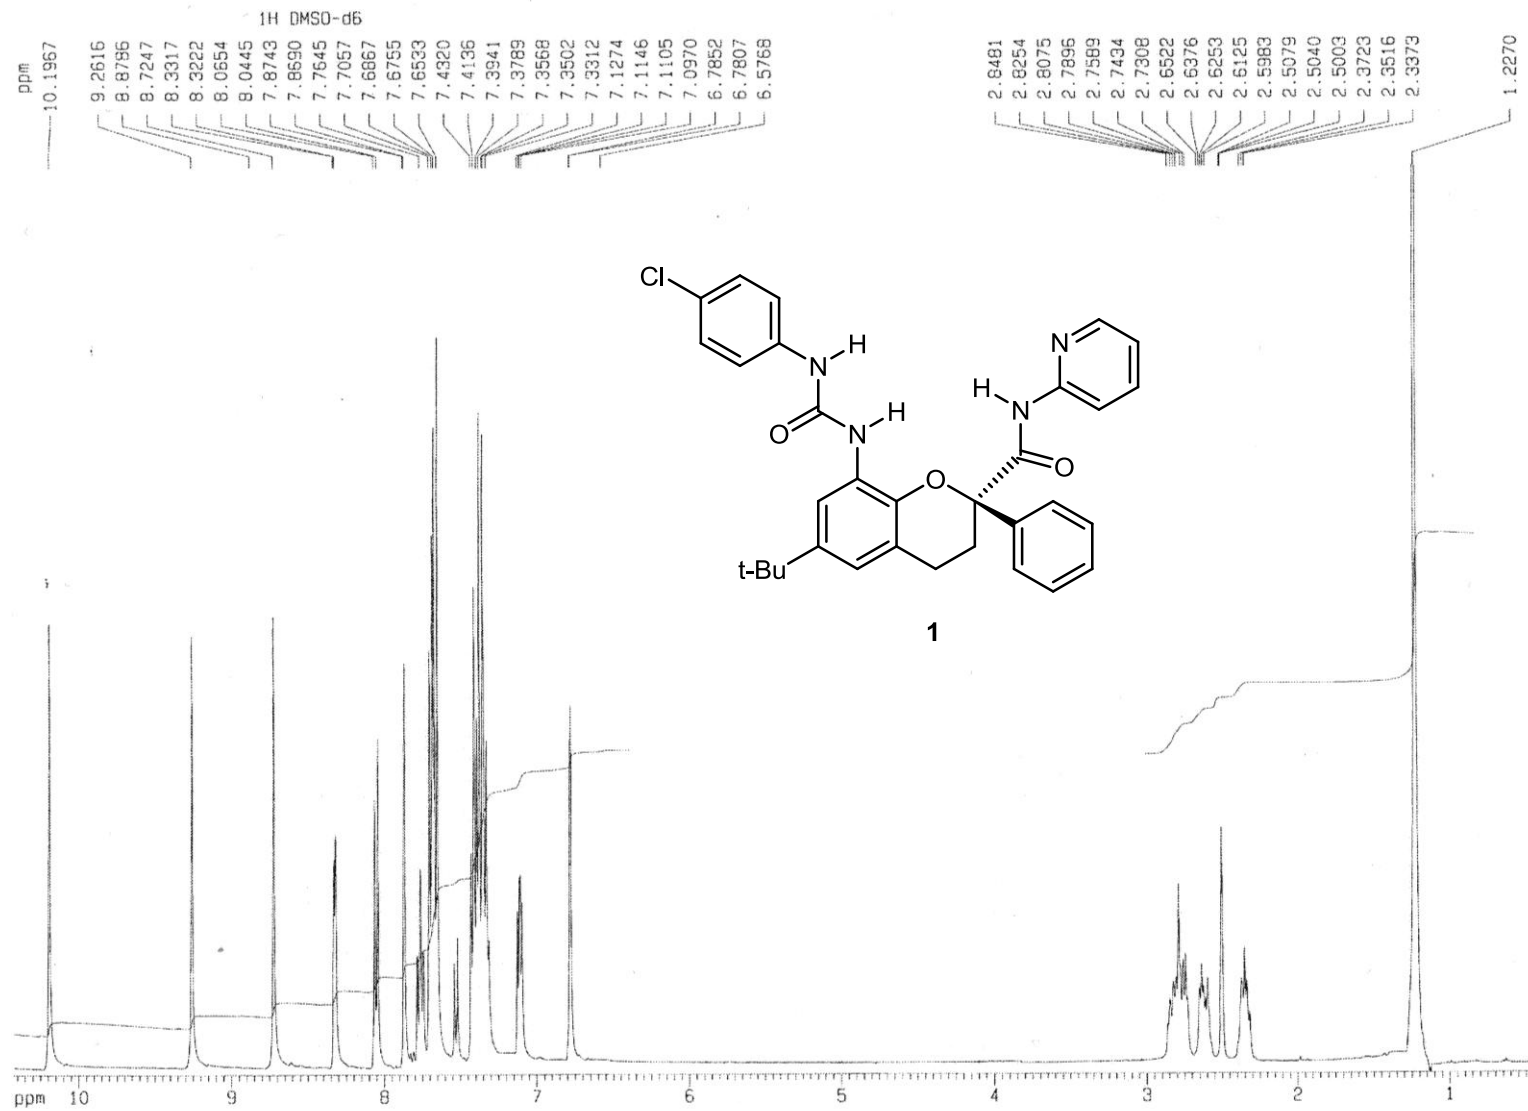

Figure S19.  $^{13}\text{C}$  NMR spectrum of receptor 1. (100 MHz,  $\text{DMSO-}d_6$ ).

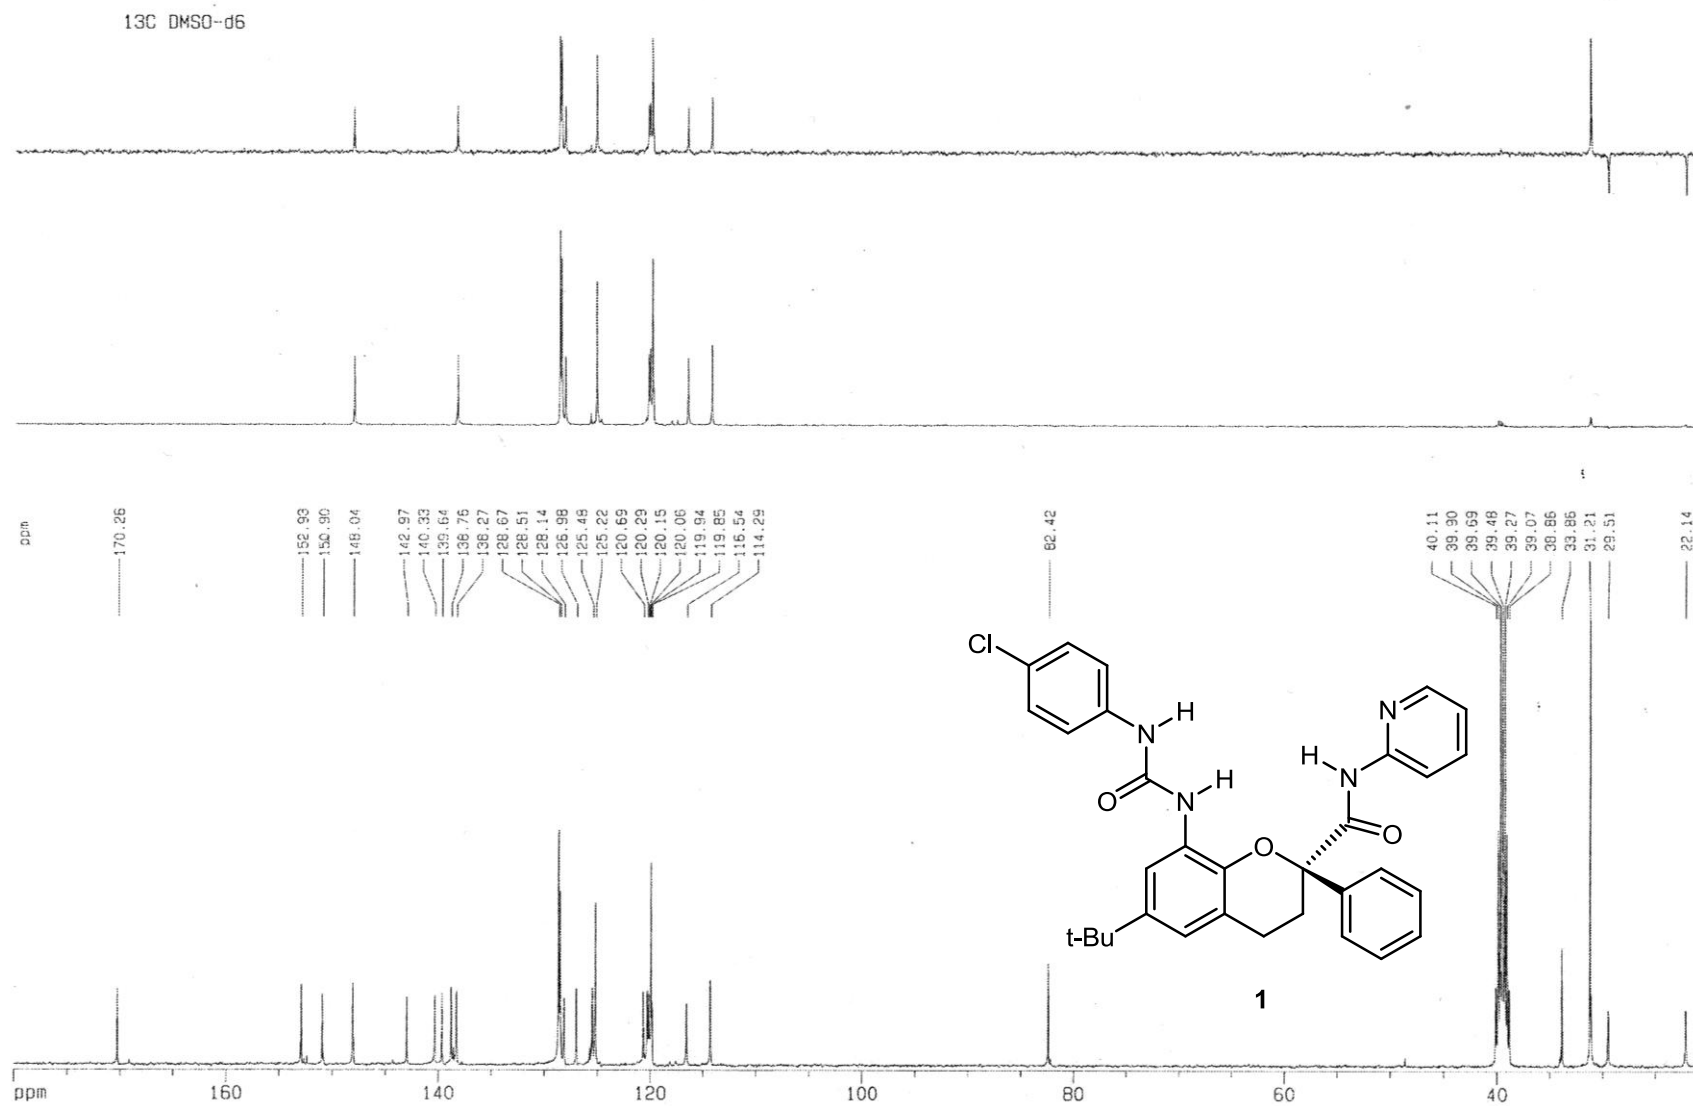

Figure S20. ROESY spectrum of receptor 1 (DMSO- $d_6$ ).

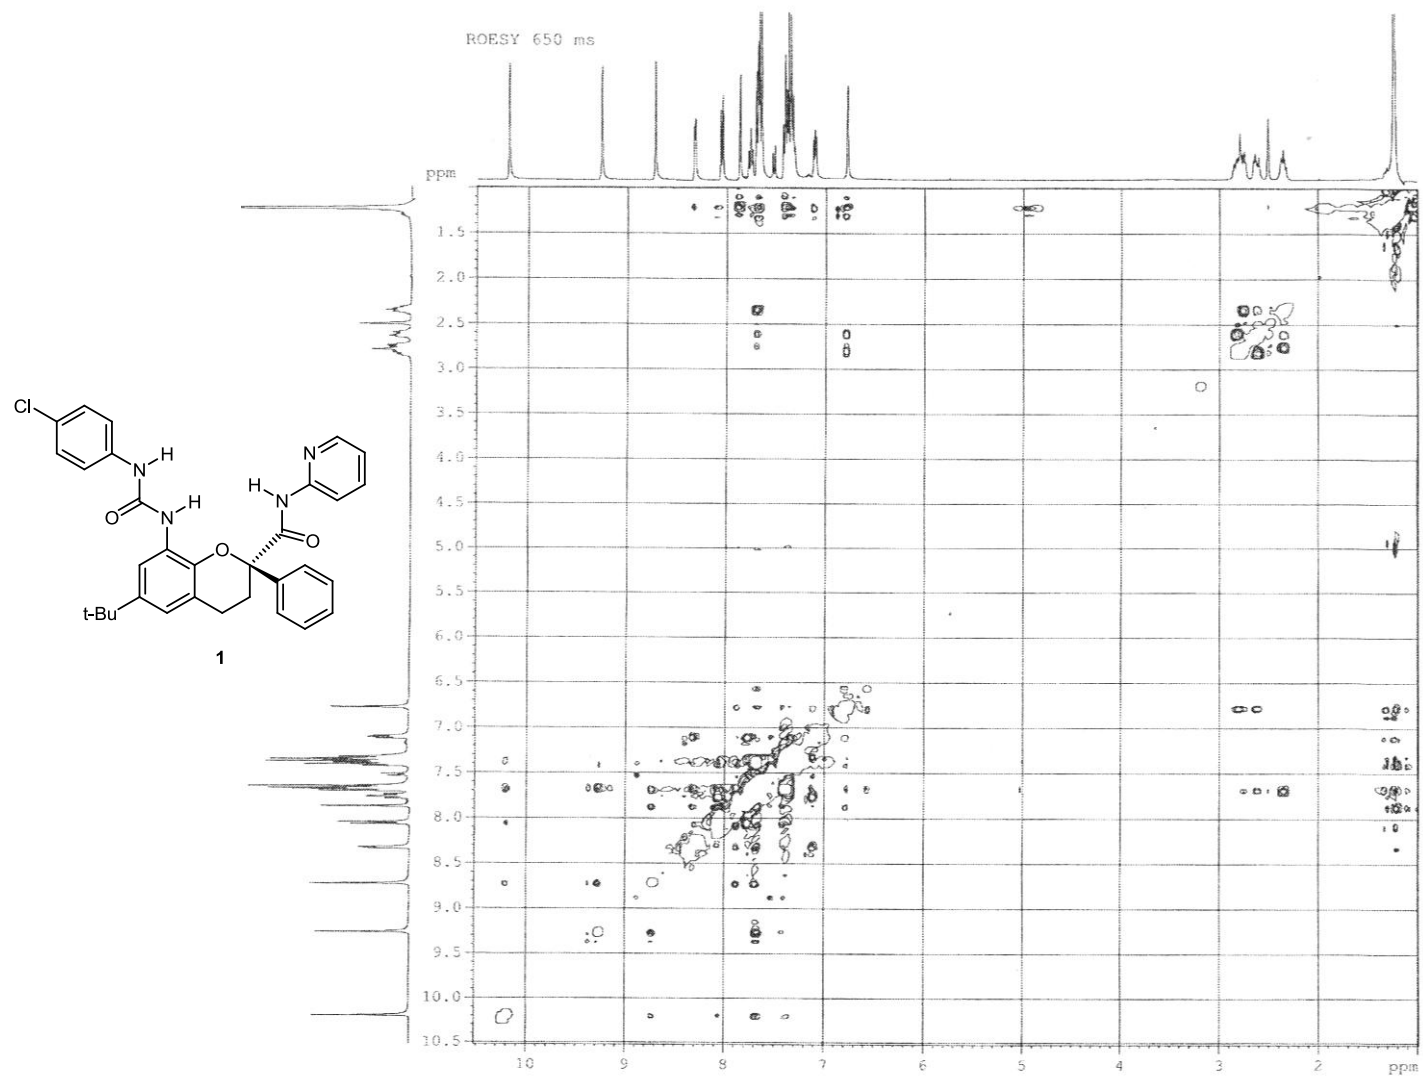

Figure S21. COSY spectrum of receptor 1 (DMSO-*d*<sub>6</sub>).

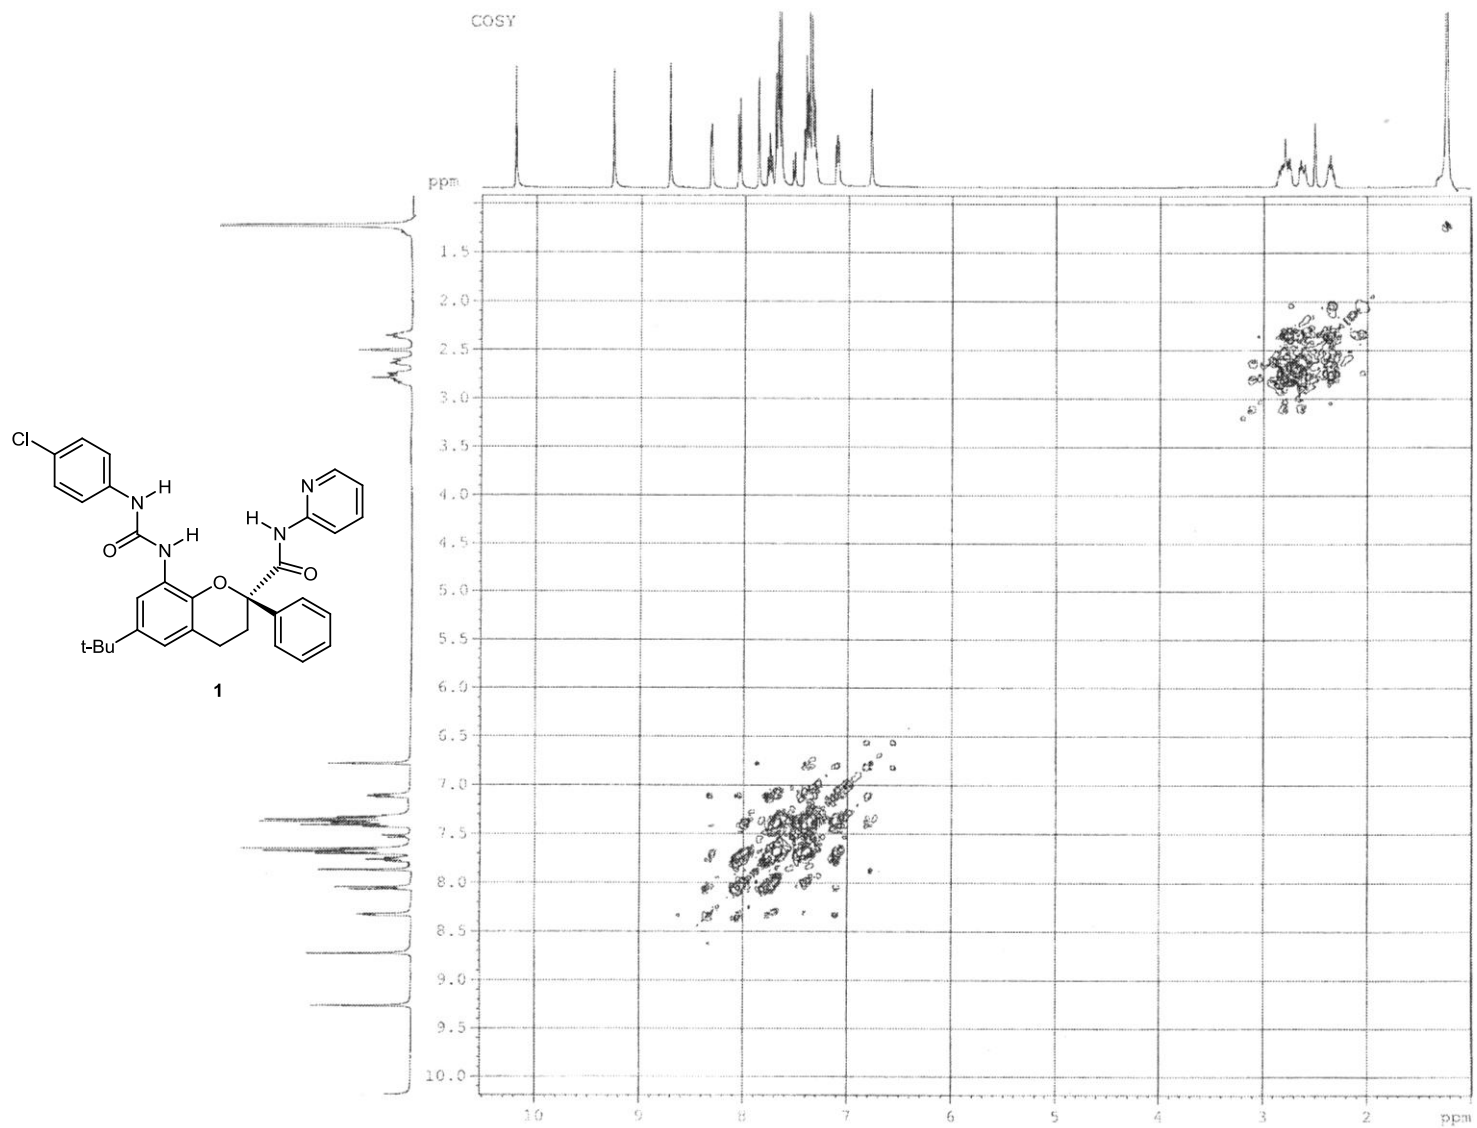



**Figure S22. HMQC spectrum of receptor 1 (DMSO-*d*<sub>6</sub>).**

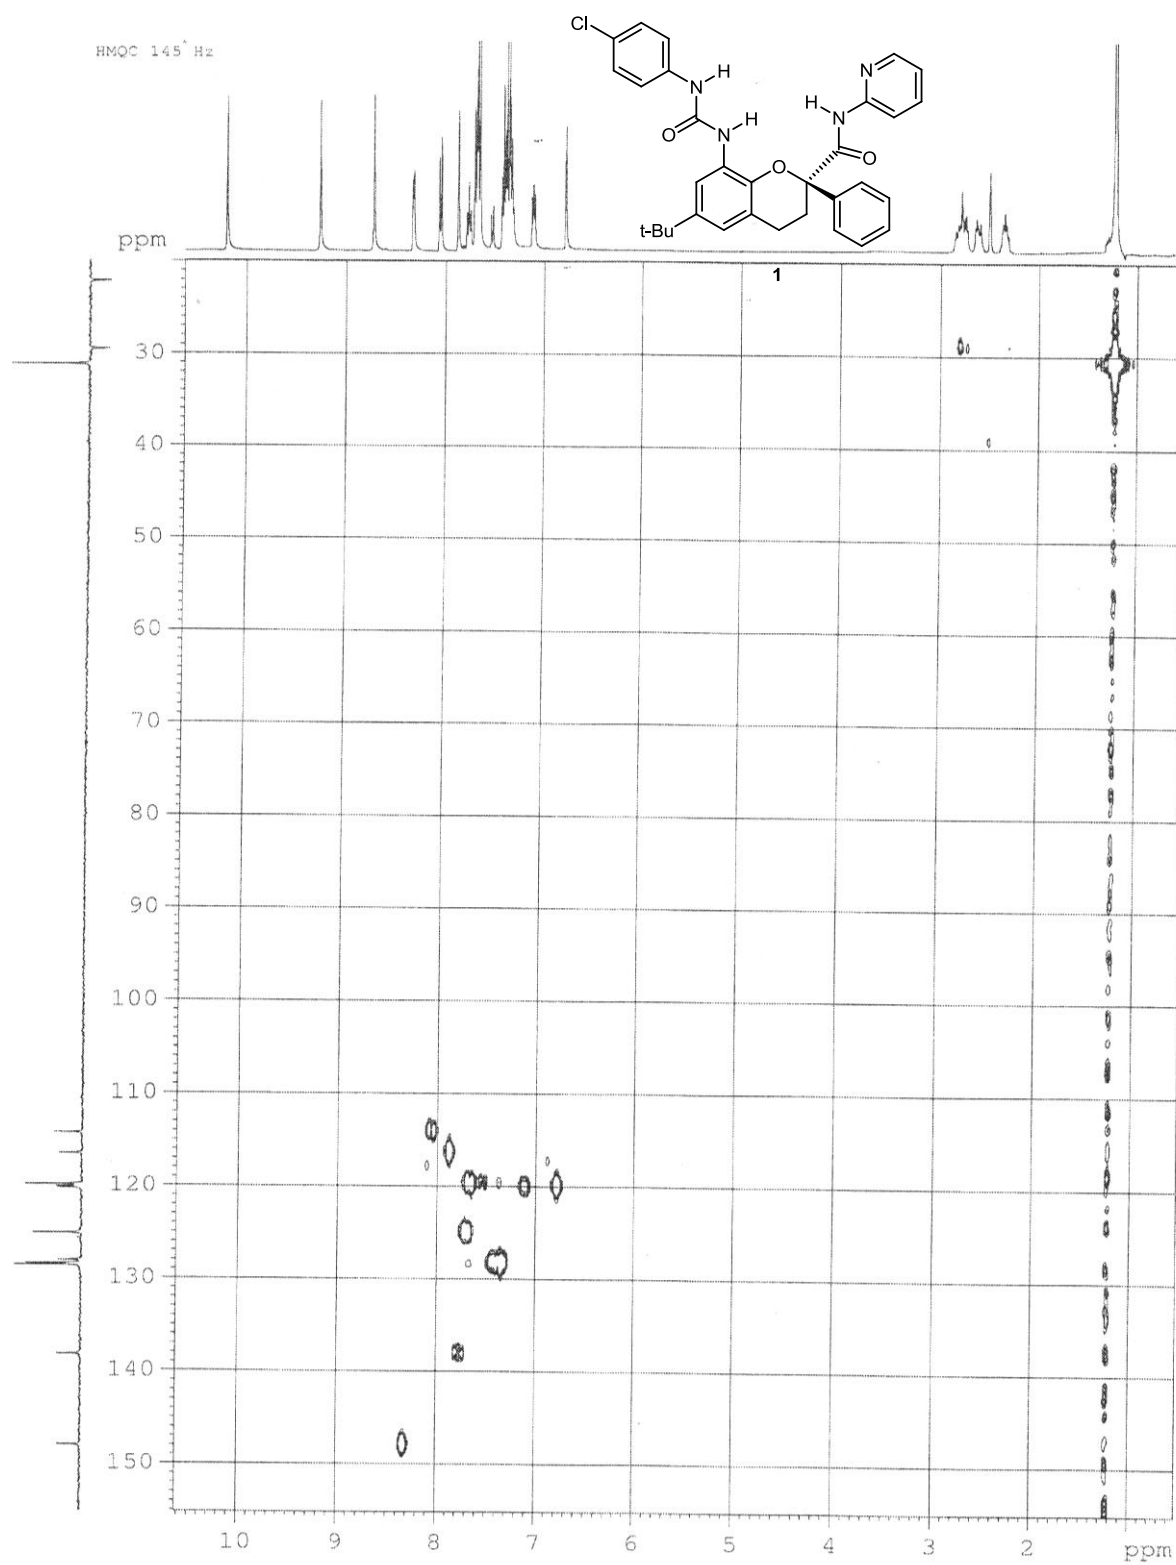

**Figure S23. HMBC spectrum of receptor 1 (DMSO-*d*<sub>6</sub>).**

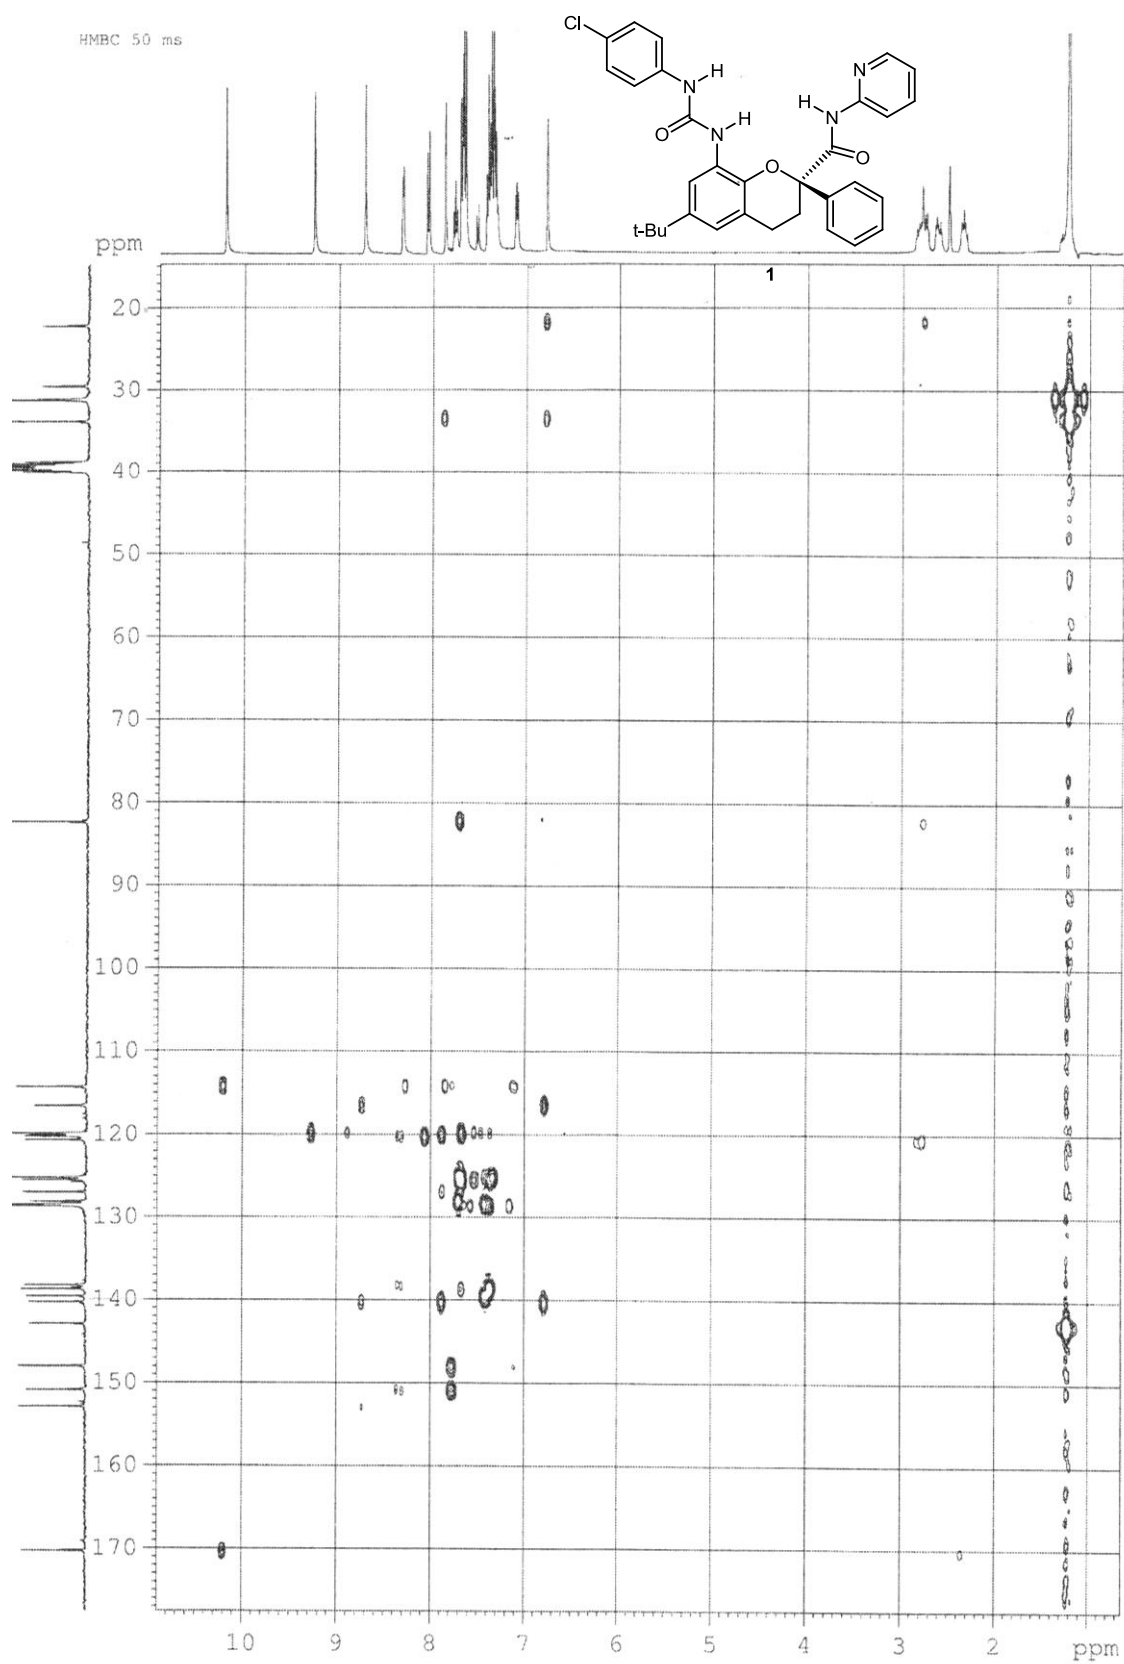

Figure S24. IR spectrum of receptor 1 (nujol).

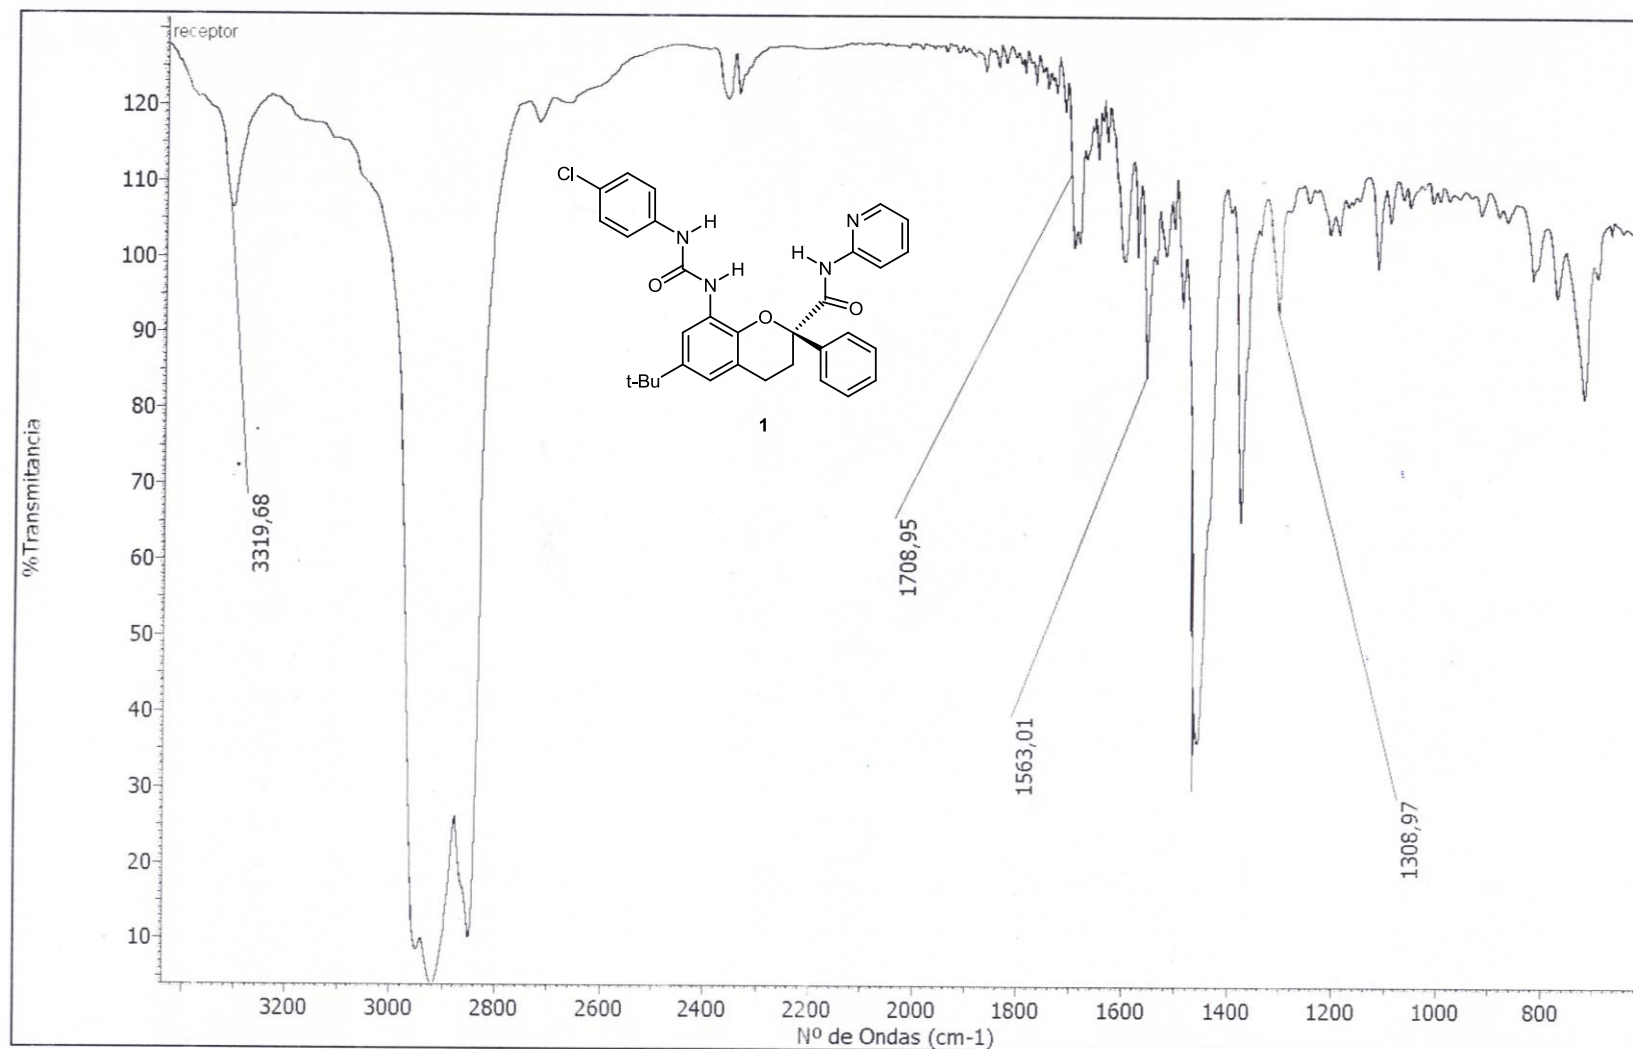

Figure S25. HRM spectrum receptor 1 (ESI-QTOF).

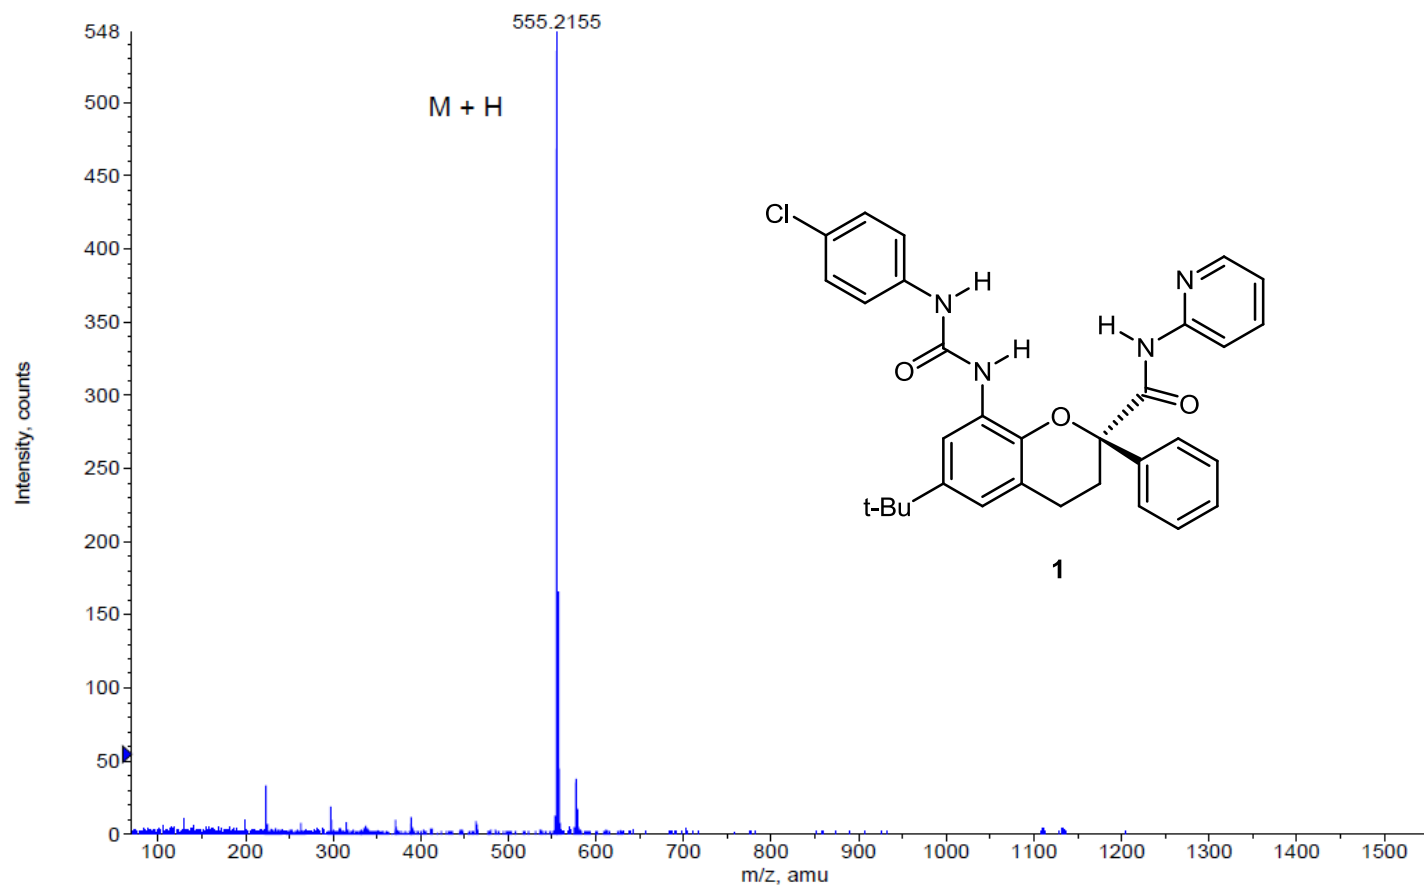

Figure S26. ORTEP diagram and X-ray crystal structure data of receptor 1 with ethyl acetate.

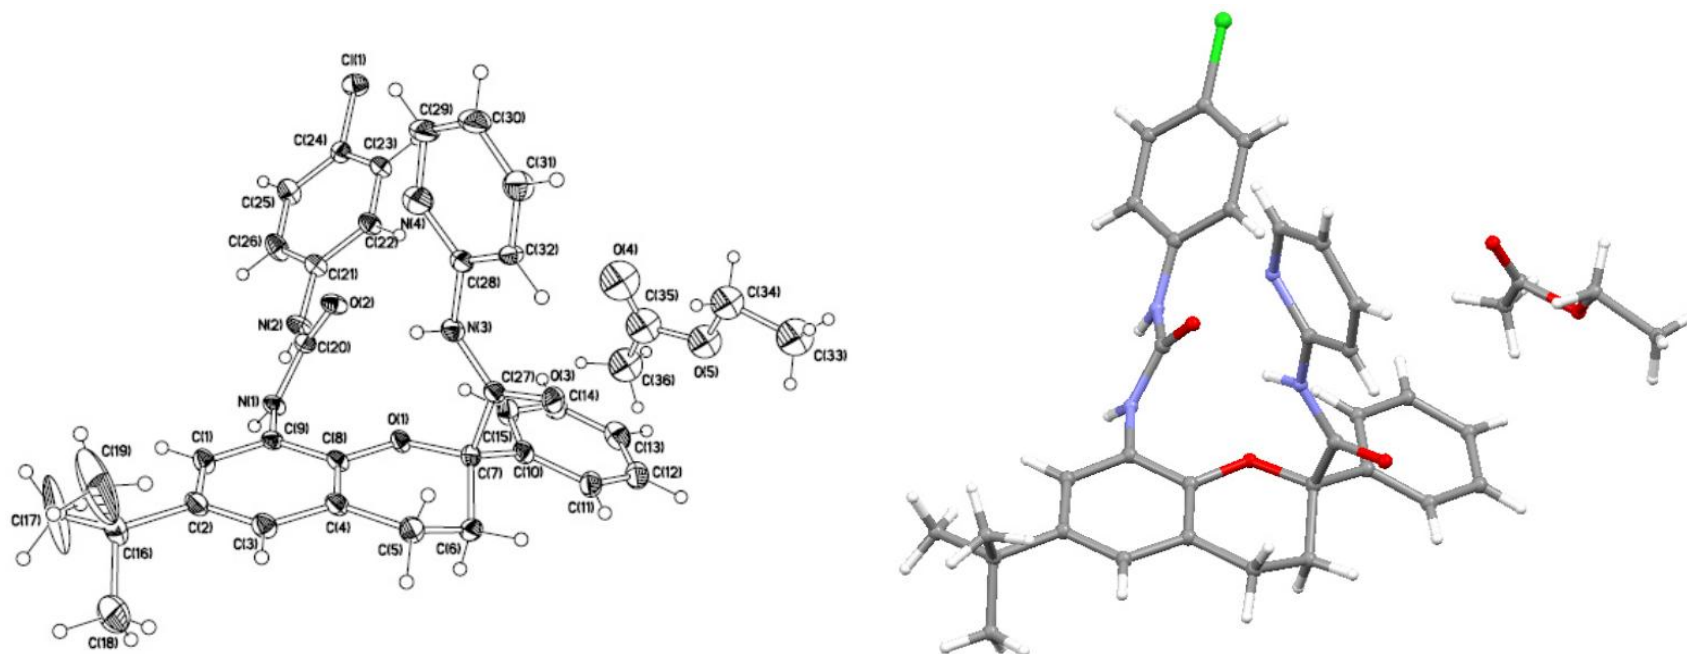

**Crystal data:**  $C_{32}H_{31}ClN_4O_3$ ,  $C_4H_8O_2M = 643.16$ , monoclinic, space group  $P21/n$ ,  $a = 11.6441(4) \text{ \AA}$ ,  $b = 19.0040(11) \text{ \AA}$ ,  $c = 15.7545(8) \text{ \AA}$ ,  $\alpha = \gamma = 90^\circ$ ,  $\beta = 104.803(3)$ ,  $V = 3370.5(3) \text{ \AA}^3$ ,  $Z = 4$ ,  $D_C = 1.267 \text{ Mg/m}^3$ ,  $m = (\text{Cu-K}\alpha) = 1.390 \text{ mm}^{-1}$ ,  $F(000) = 1360$ . 14091 reflections were collected at  $3.72 \leq 2\theta \leq 67.20$  and merged to give 5575 unique reflections ( $R_{\text{int}} = 0.0636$ ). Final values are  $R = 0.1032$ ,  $wR = 0.2658$ ,  $\text{GOF} = 1.104$ , max/min residual electron density  $0.409$  and  $-0.447 e. \text{ \AA}^{-3}$ .

Figure S27. ORTEP diagram and X-ray crystal structure data of receptor 1 with water.

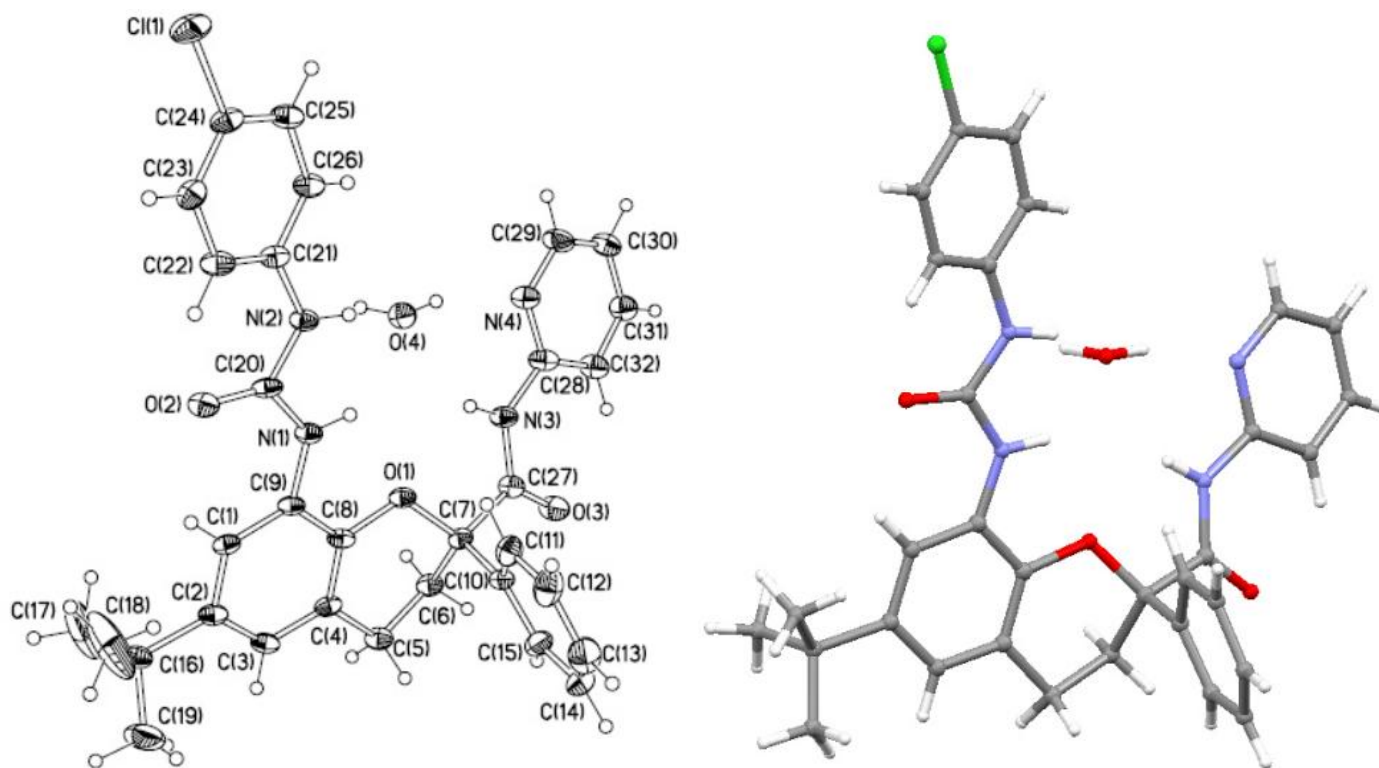

**Crystal data:**  $C_{32}H_{31}ClN_4O_3$ ,  $H_2O$   $M = 573.07$ , Triclinic, space group P-1,  $a = 8.4156(5) \text{ \AA}$ ,  $b = 11.6638(8) \text{ \AA}$ ,  $c = 14.9936(8) \text{ \AA}$ ,  $\alpha = 87.286(5)$ ,  $\beta = 83.220(4)$ ,  $\gamma = 82.716(5)$ ,  $V = 1448.87(15) \text{ \AA}^3$ ,  $Z = 2$ ,  $D_c = 1314 \text{ Mg/m}^3$ ,  $m = (Cu-K\alpha) = 1.525 \text{ mm}^{-1}$ ,  $F(000) = 604$ . 8298 reflections were collected at  $2.97 \leq 2\theta \leq 67.29$  and merged to give 4419 unique reflections ( $R_{int} = 0.0755$ ). Final values are  $R = 0.1298$ ,  $wR = 0.3206$ ,  $GOF = 2.257$ , max/min residual electron density  $0.843 -0.797 \text{ e. \AA}^{-3}$ .

Figure S28.  $^1\text{H}$  NMR spectrum of receptor 1 with tetrabutylammonium acetate (200MHz,  $\text{CDCl}_3$ ).

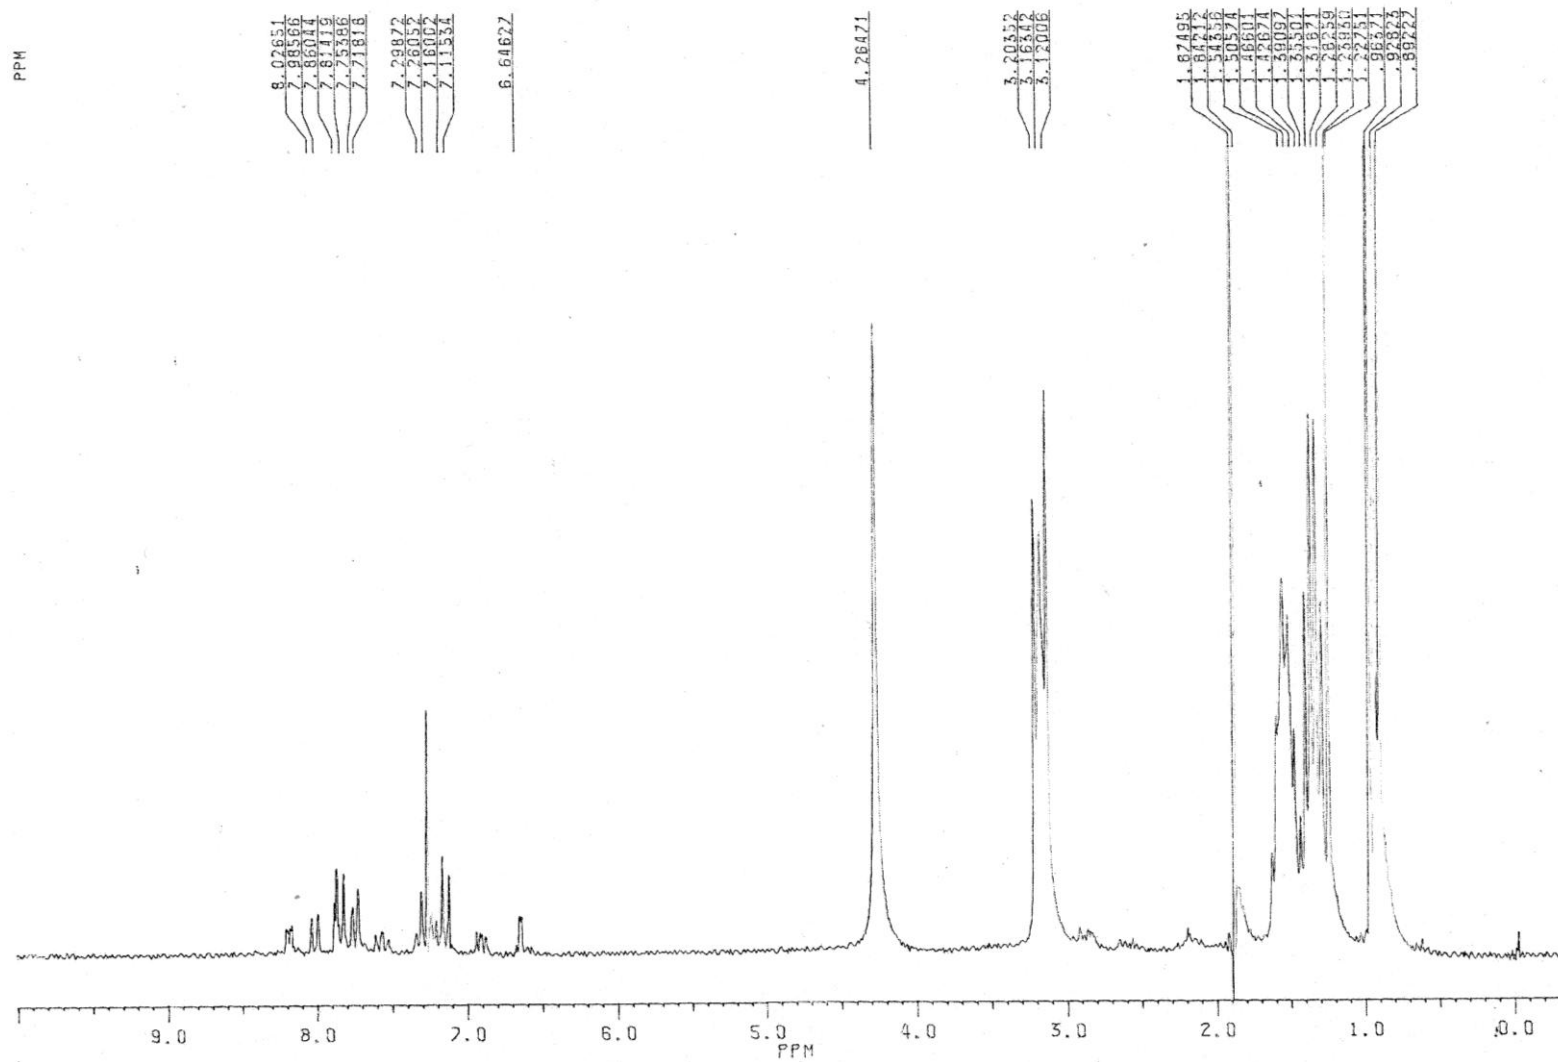

Figure S29.  $^1\text{H}$  NMR spectrum of receptor 1 with *L*-proline (400MHz,  $\text{DMSO-}d_6$ ).

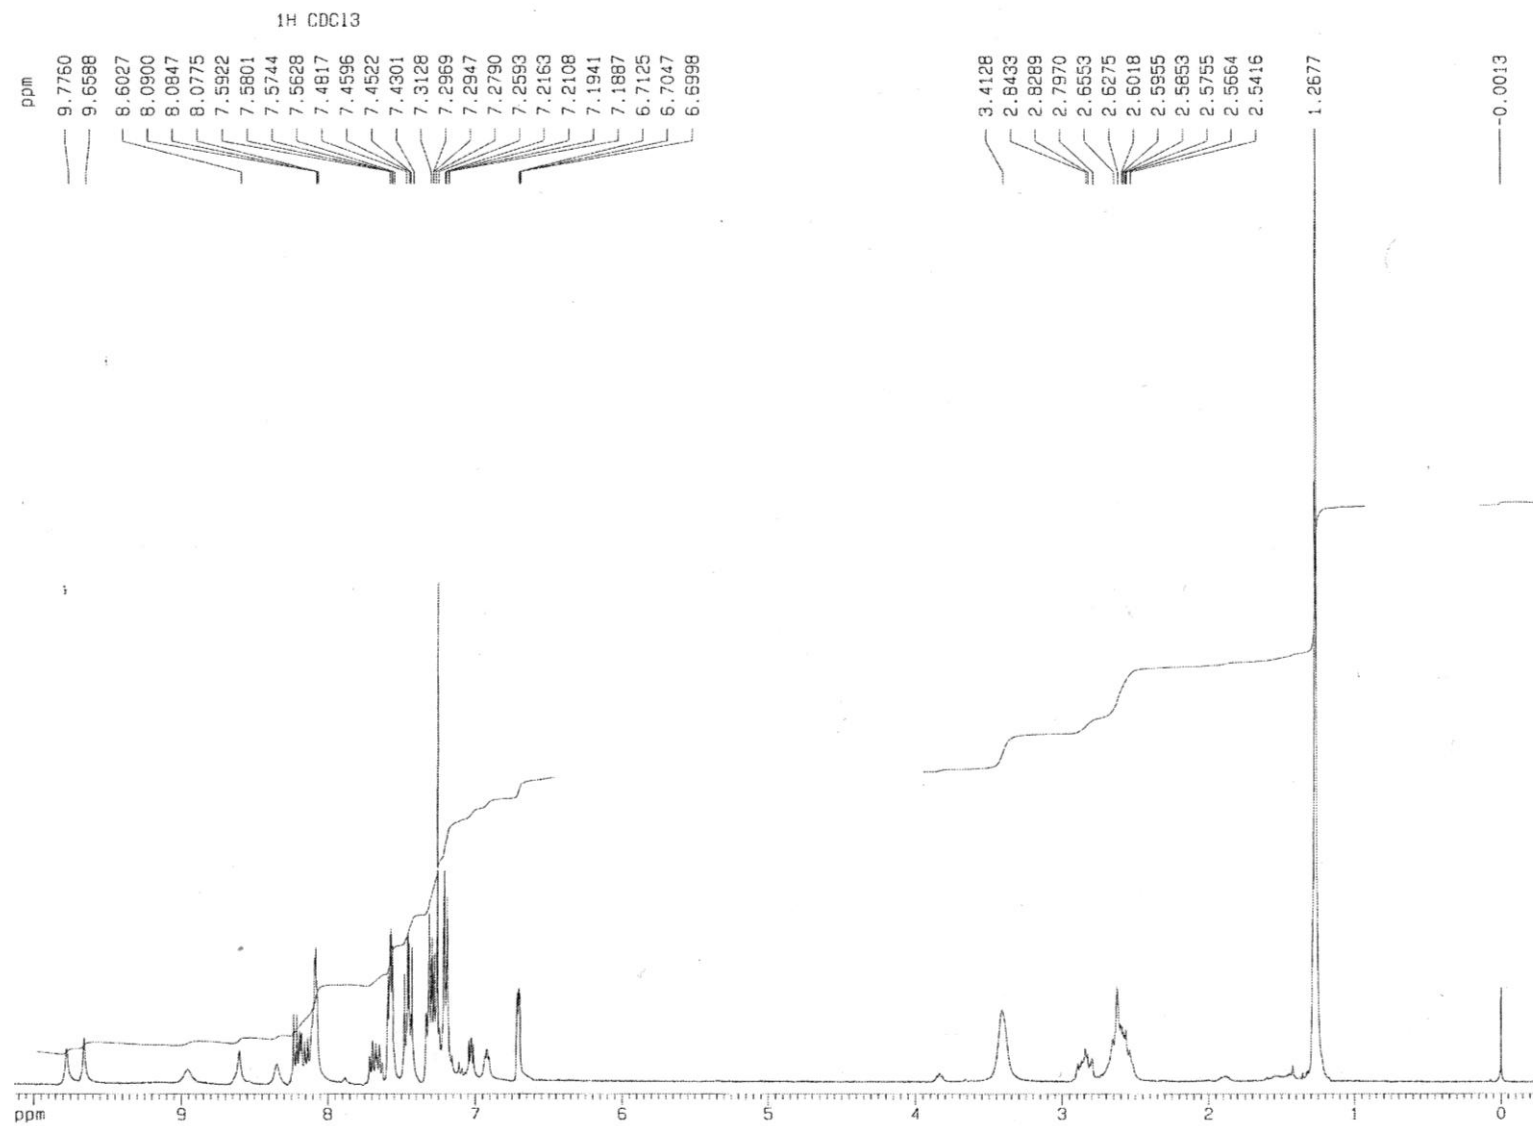



Figure S30. COSY spectrum of receptor 1 with *L*-proline (DMSO- $d_6$ ).

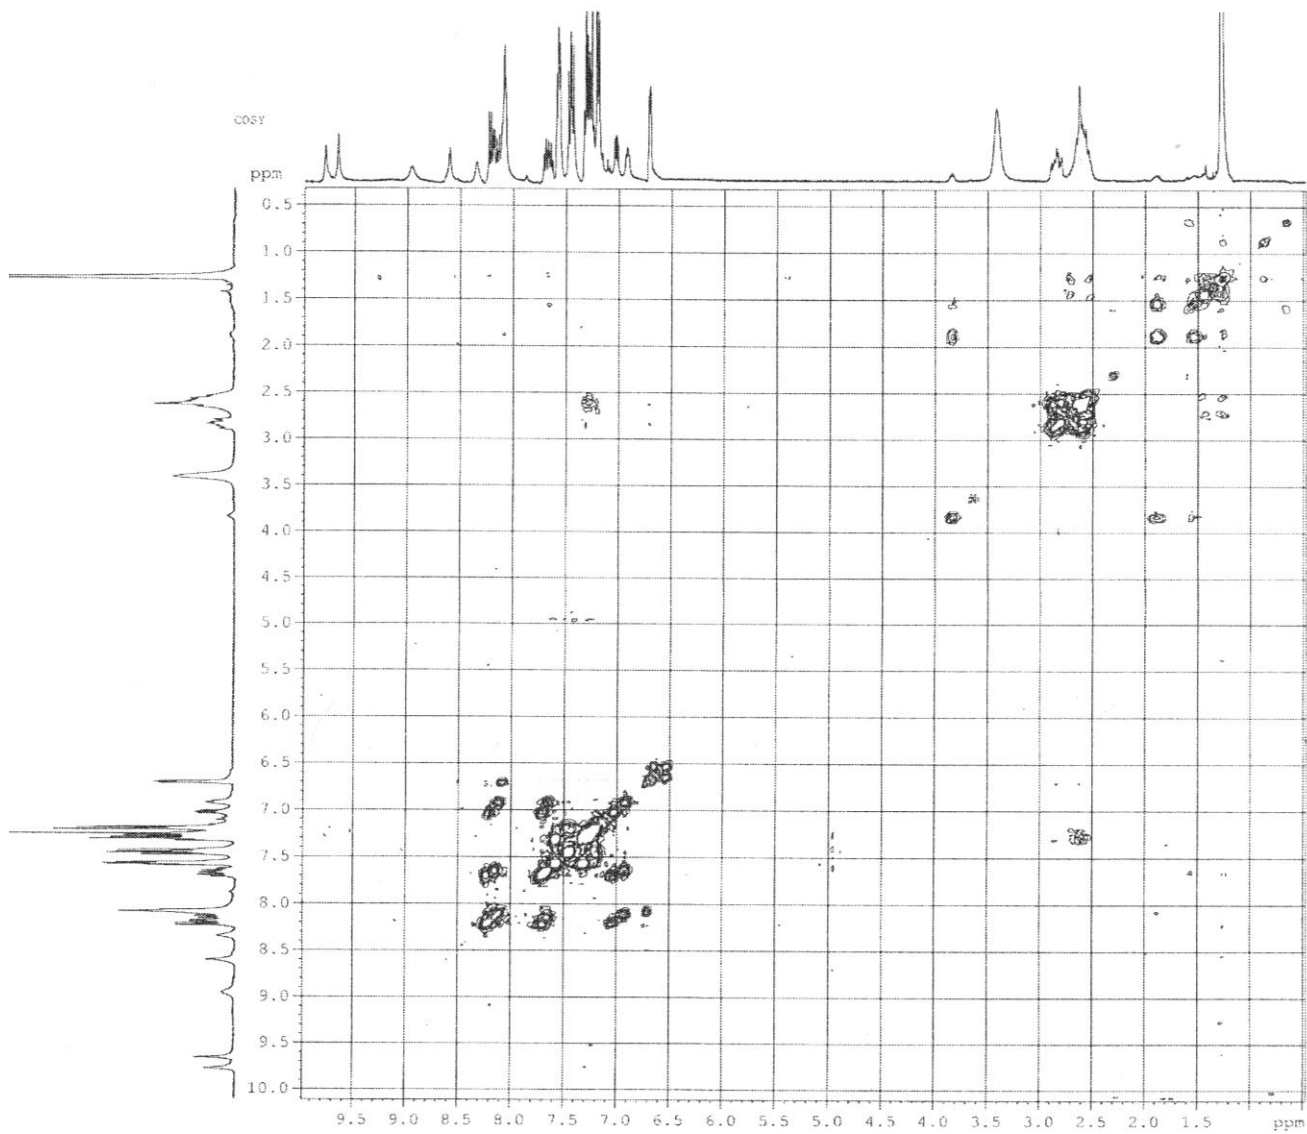

Figure S31. ROESY spectrum of receptor 1 with *L*-proline (DMSO- $d_6$ ).

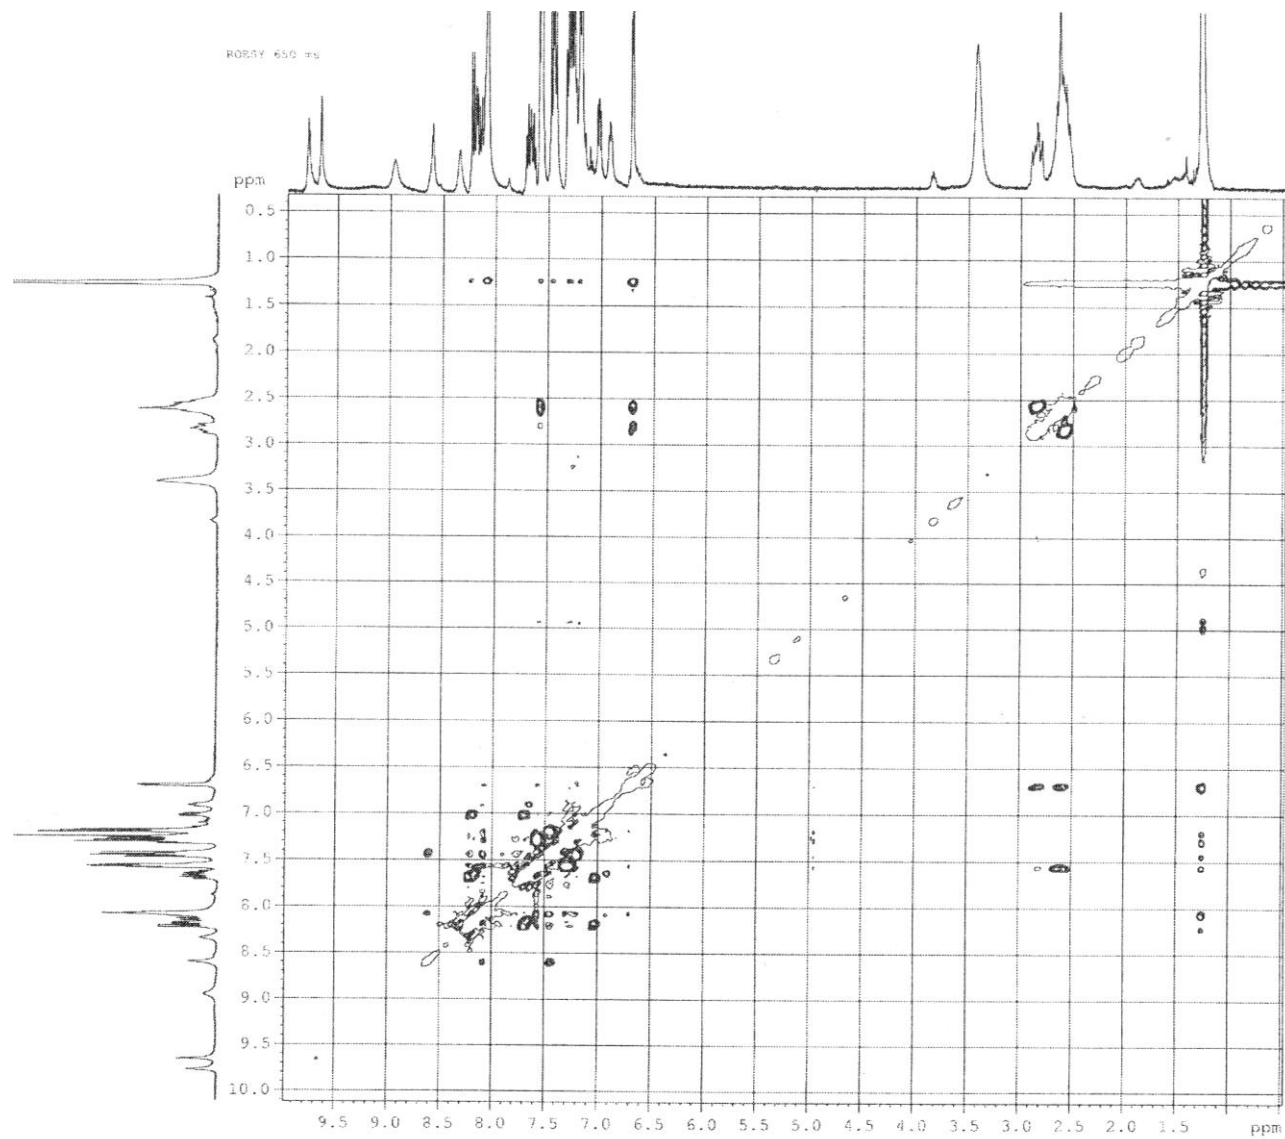

Figure S32.  $^1\text{H}$  NMR spectrum of strong complex of receptor 1 with *L*-proline (200 MHz,  $\text{CDCl}_3$ ).

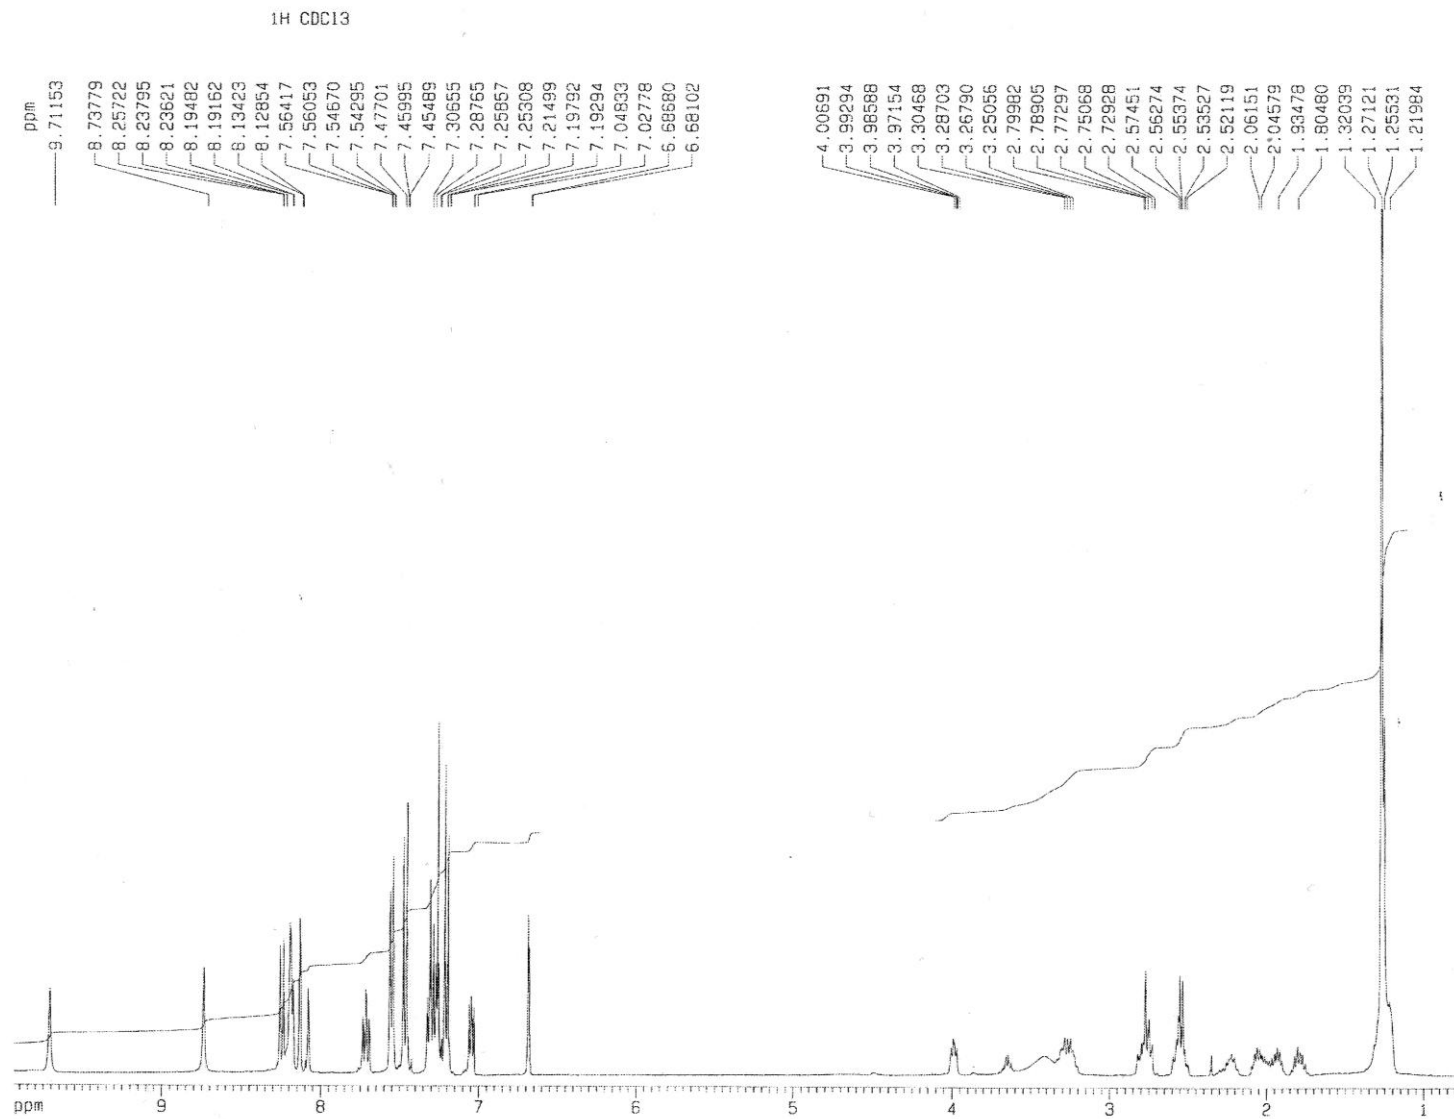

Figure S33. COSY spectrum of strong complex of receptor 1 with *L*-proline (CDCl<sub>3</sub>).

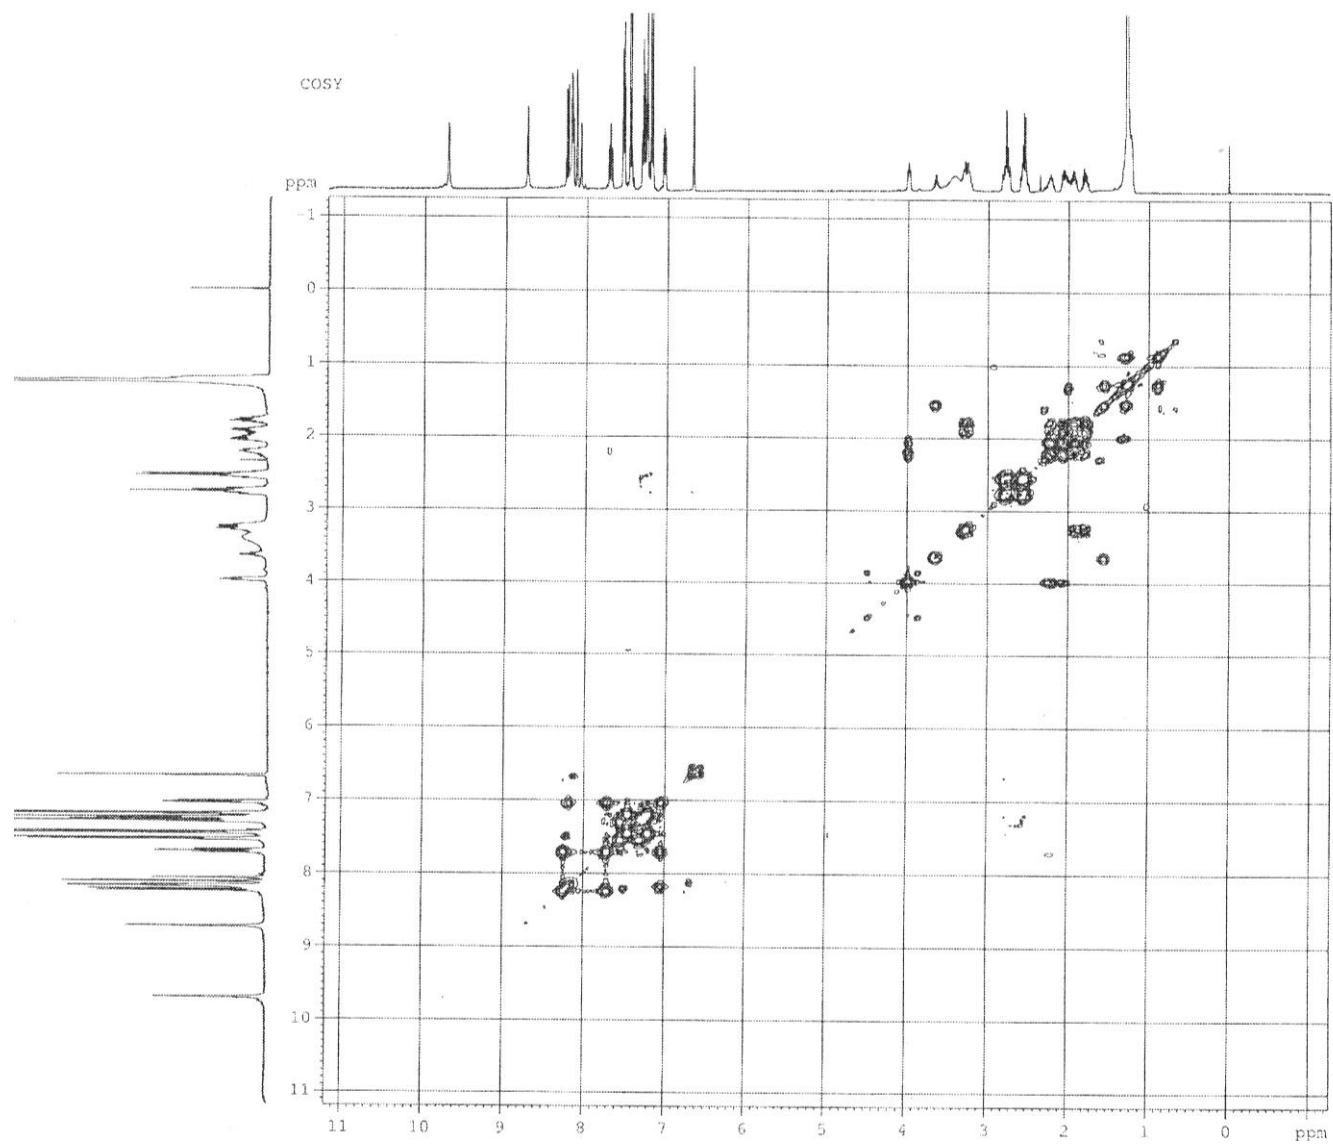

Figure S34. ROESY spectrum of strong complex of receptor 1 with *L*-proline ( $\text{CDCl}_3$ ).

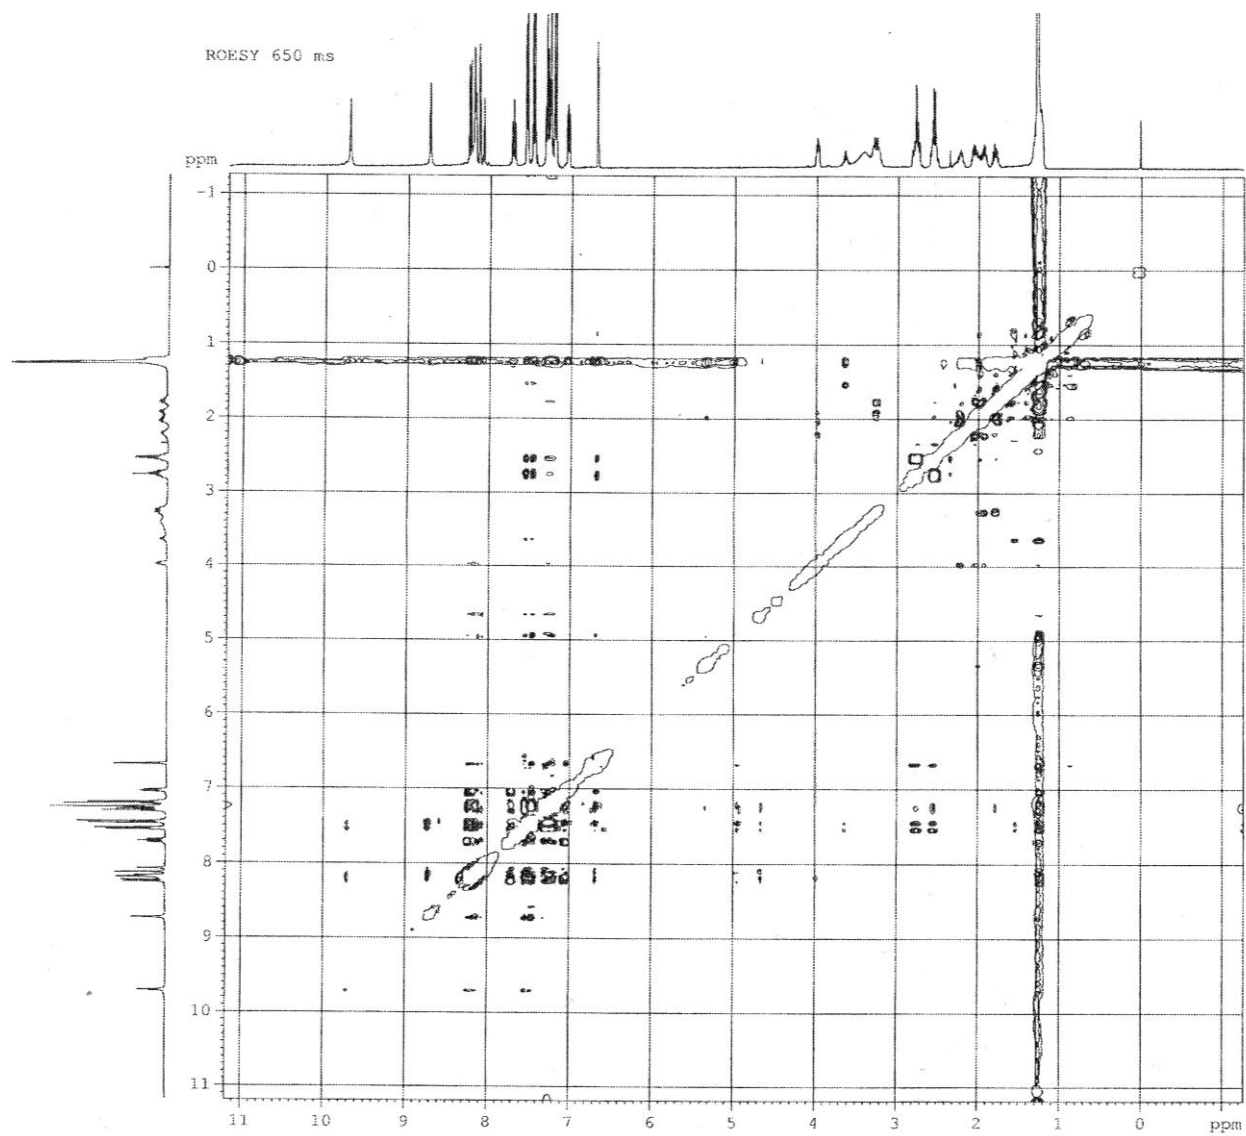

Figure S35.  $^1\text{H}$  NMR spectrum of weak complex of receptor 1 with *L*-proline (400 MHz,  $\text{CDCl}_3$ ).

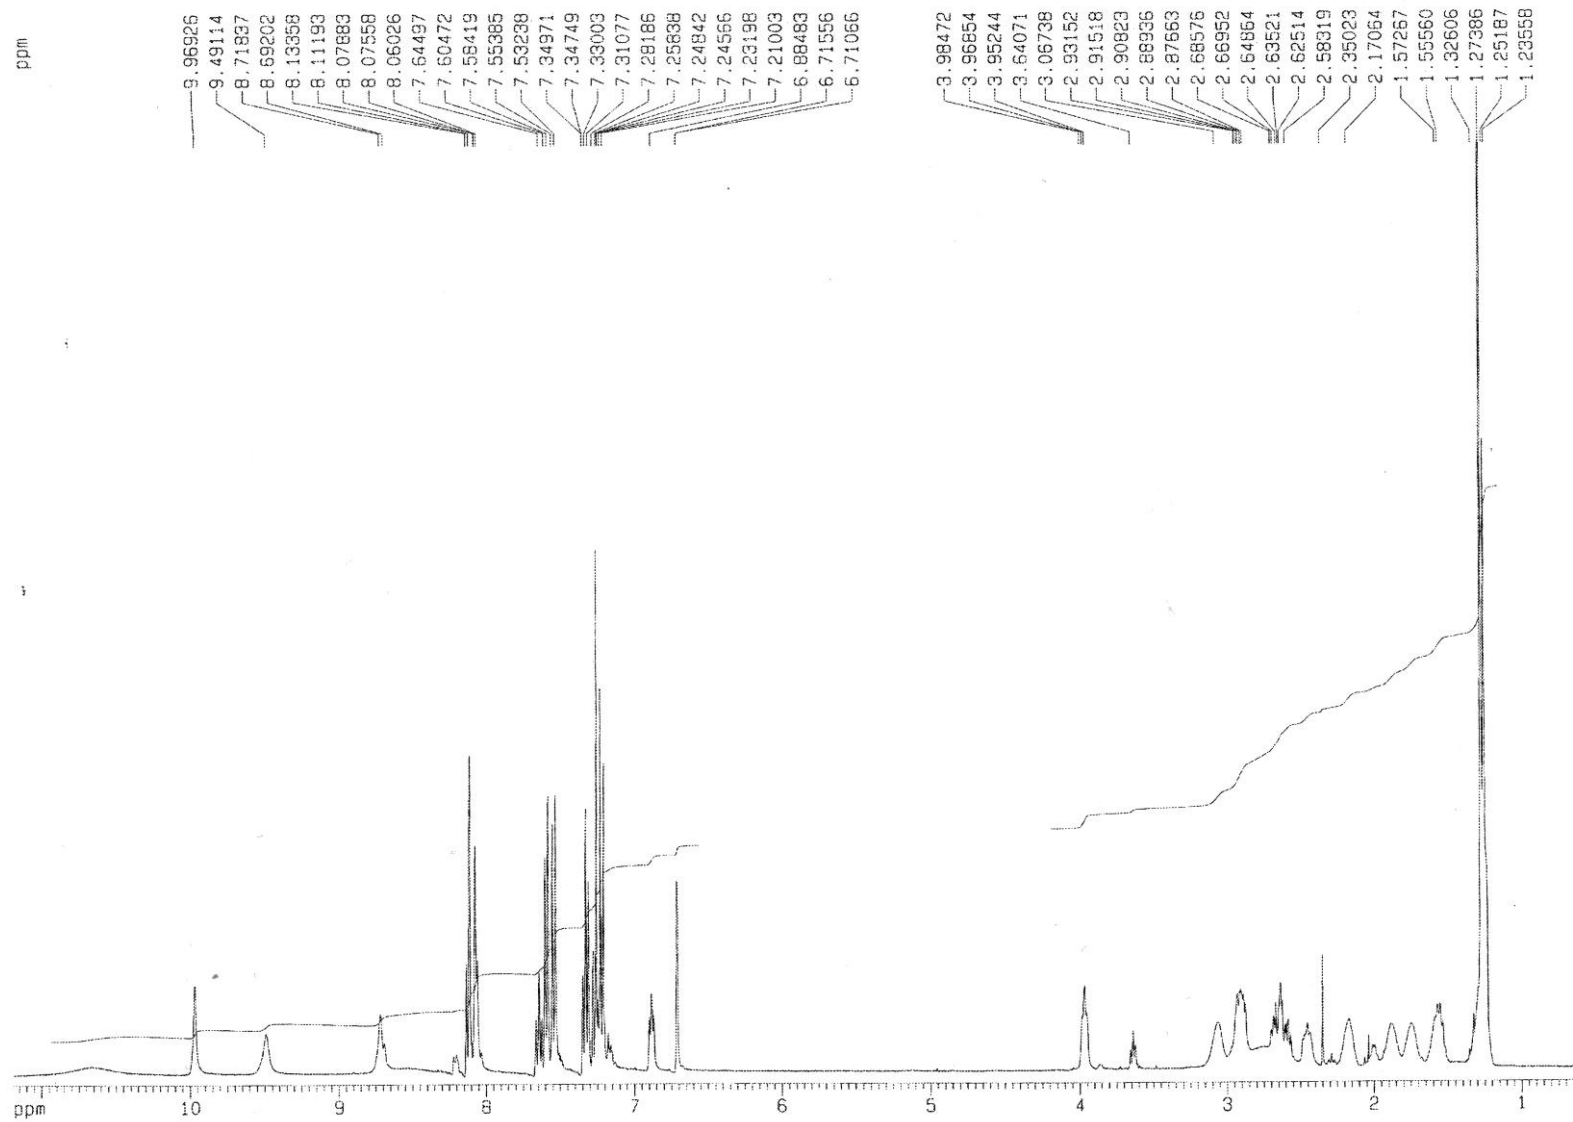

Figure S36. COSY spectrum of the weak complex of receptor 1 with *L*-proline ( $\text{CDCl}_3$ ).

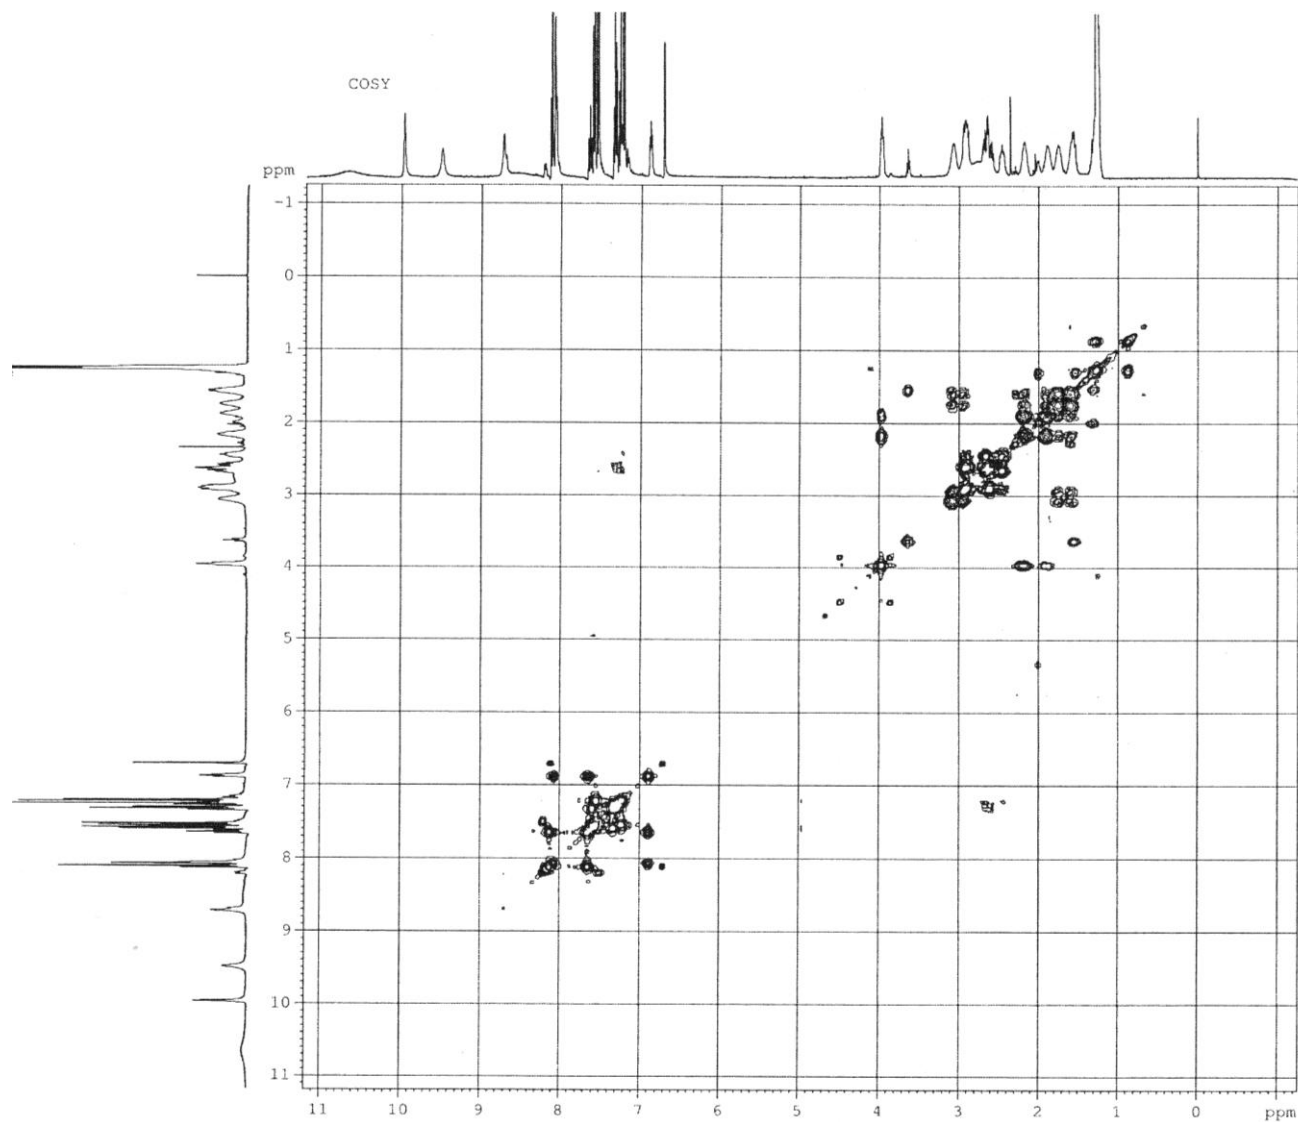

Figure S37. ROESY spectrum of the weak complex of receptor 1 with *L*-proline ( $\text{CDCl}_3$ ).

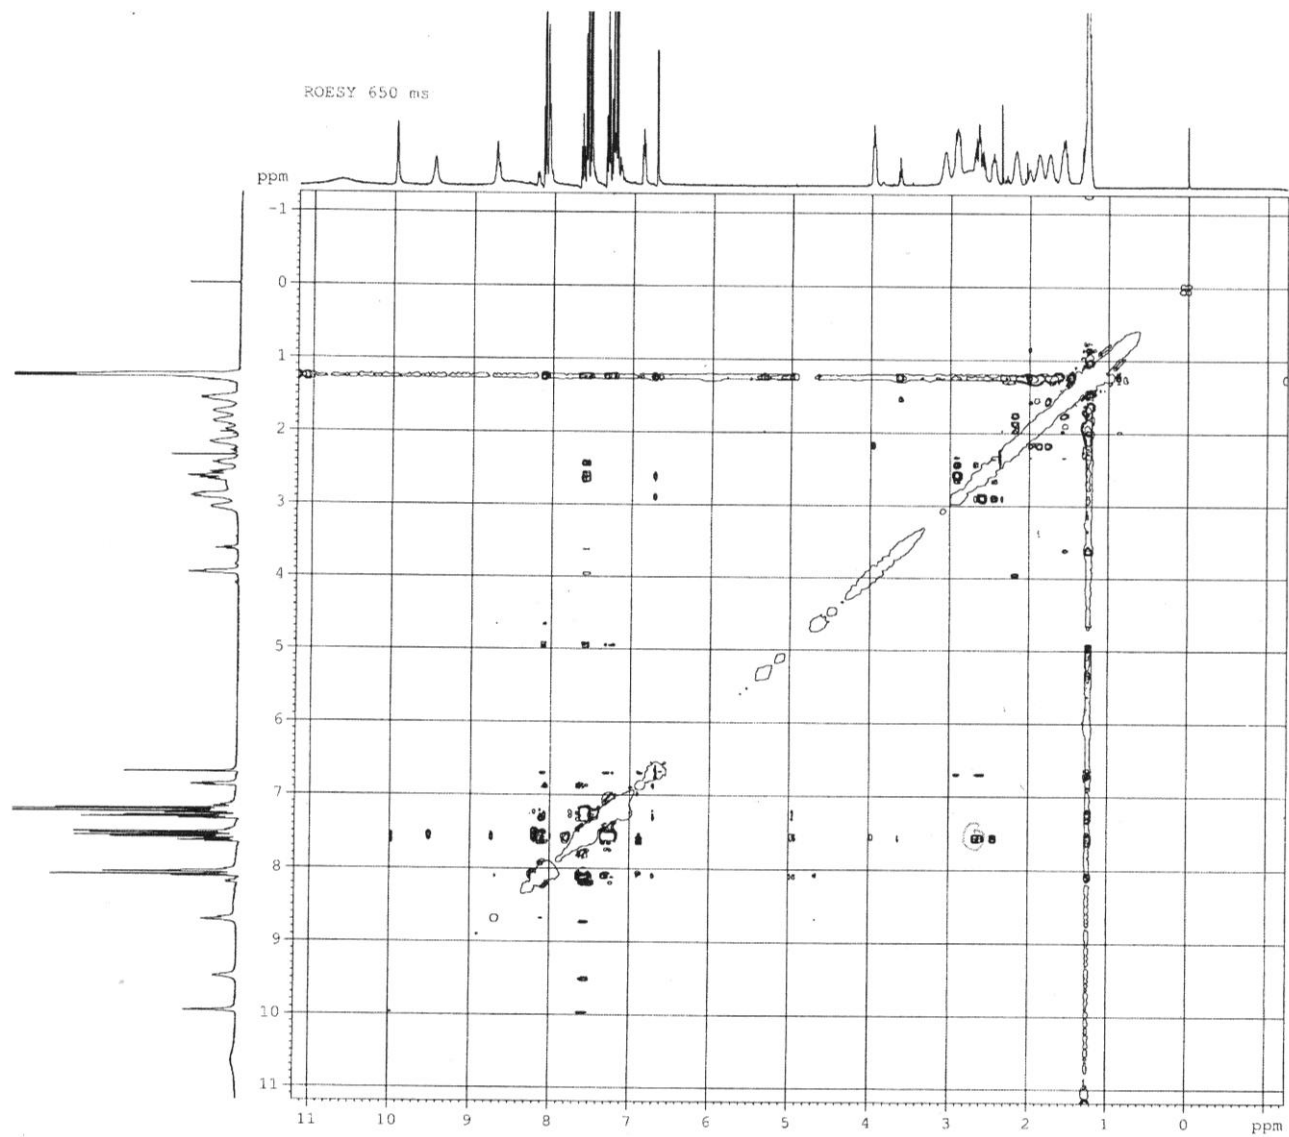



Figure S38.  $^1\text{H}$  NMR spectrum of receptor 1 with *L+D* proline.

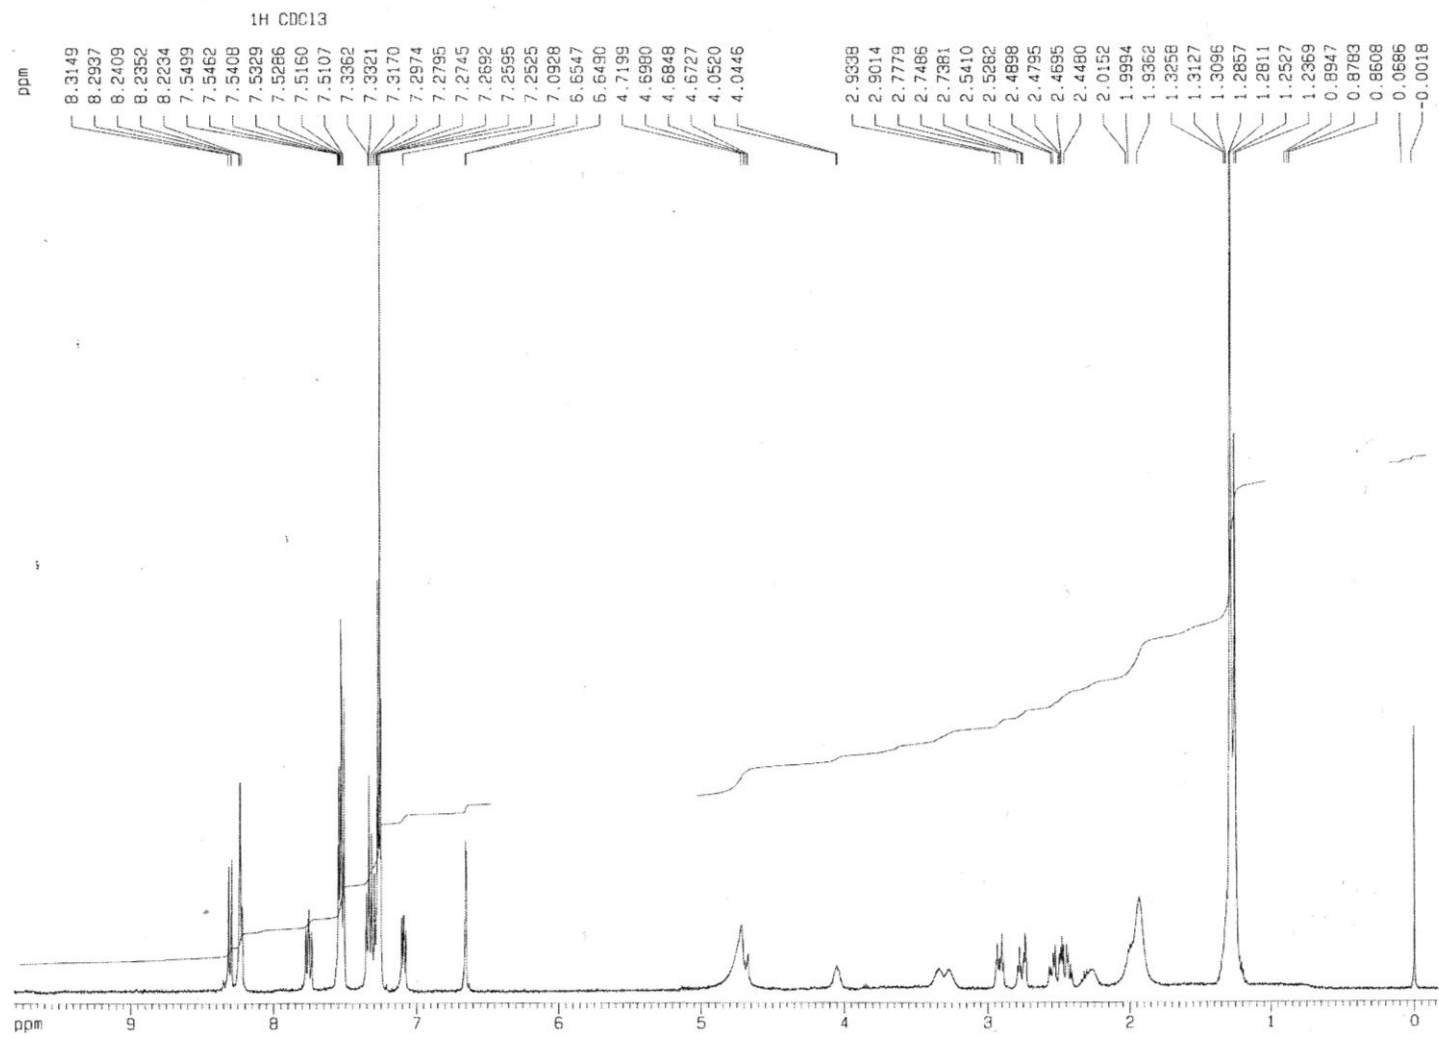

**Figure S39. Movement for the urea and the amide NHs of the receptor 1 by formation of diastereomeric associates with *L*-proline.**

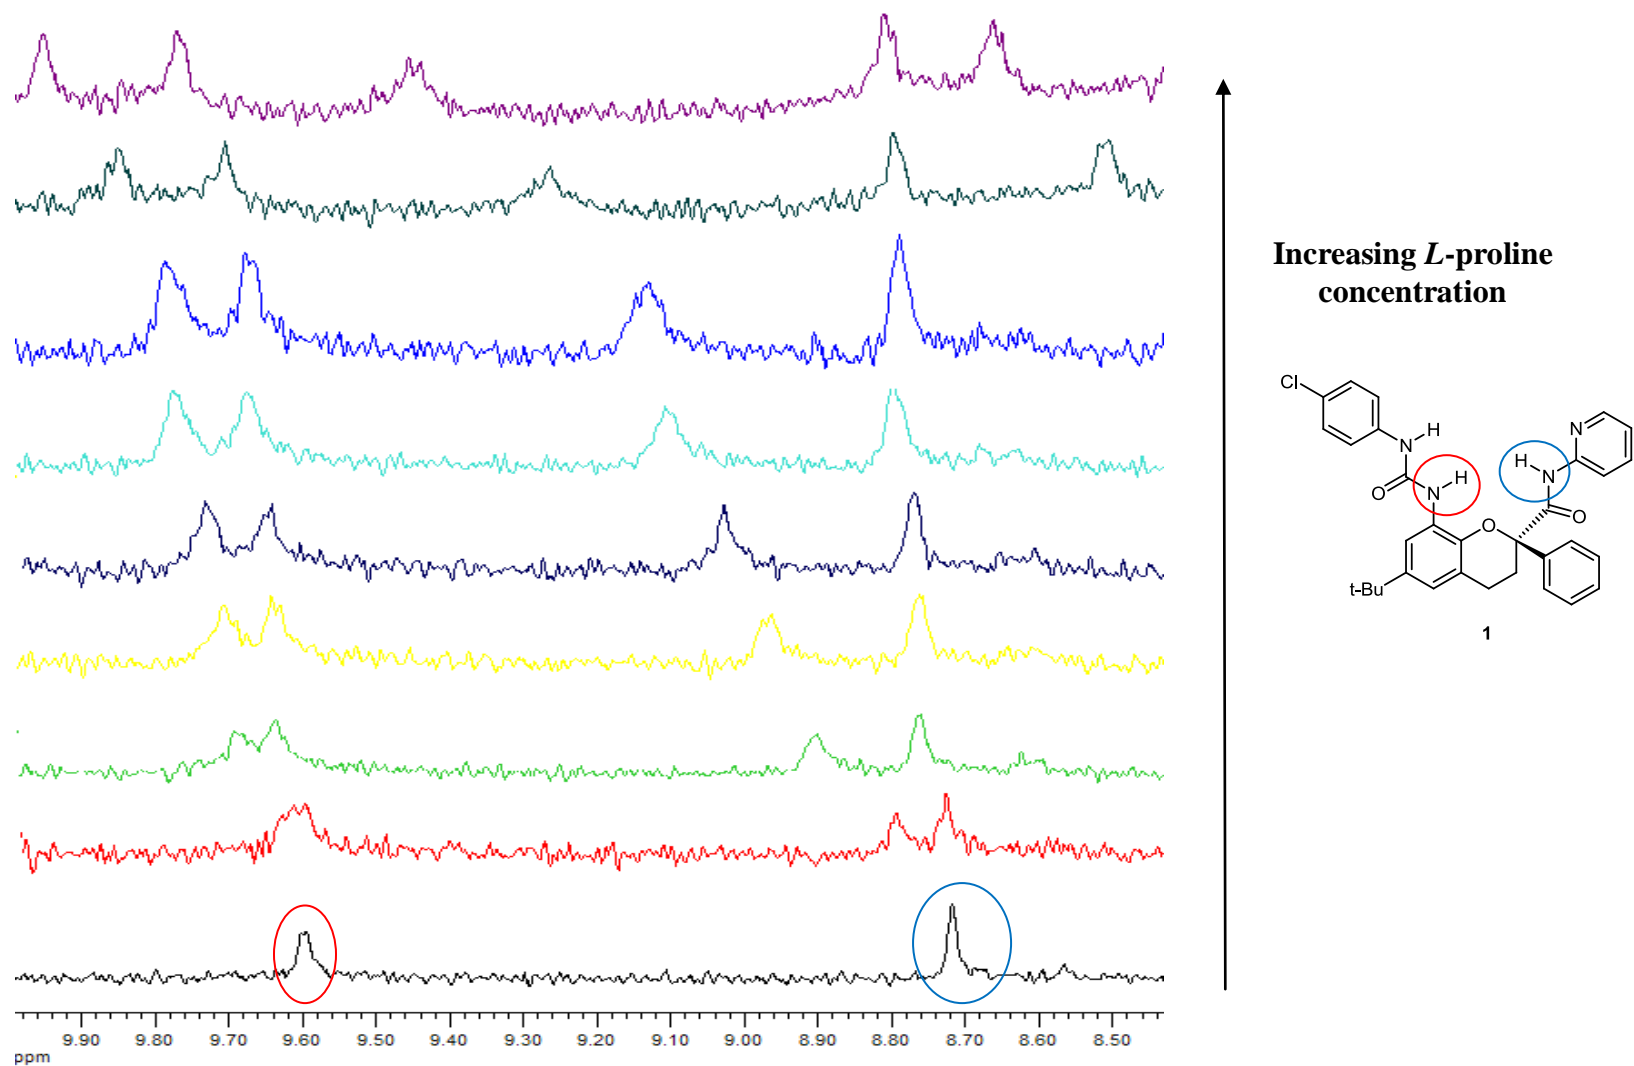

Figure S40. RMN spectrum of racemic receptor 1 and a saturated aqueous solution *D,L*-proline (a) and *L*-proline (b) (200 MHz, CDCl<sub>3</sub>).

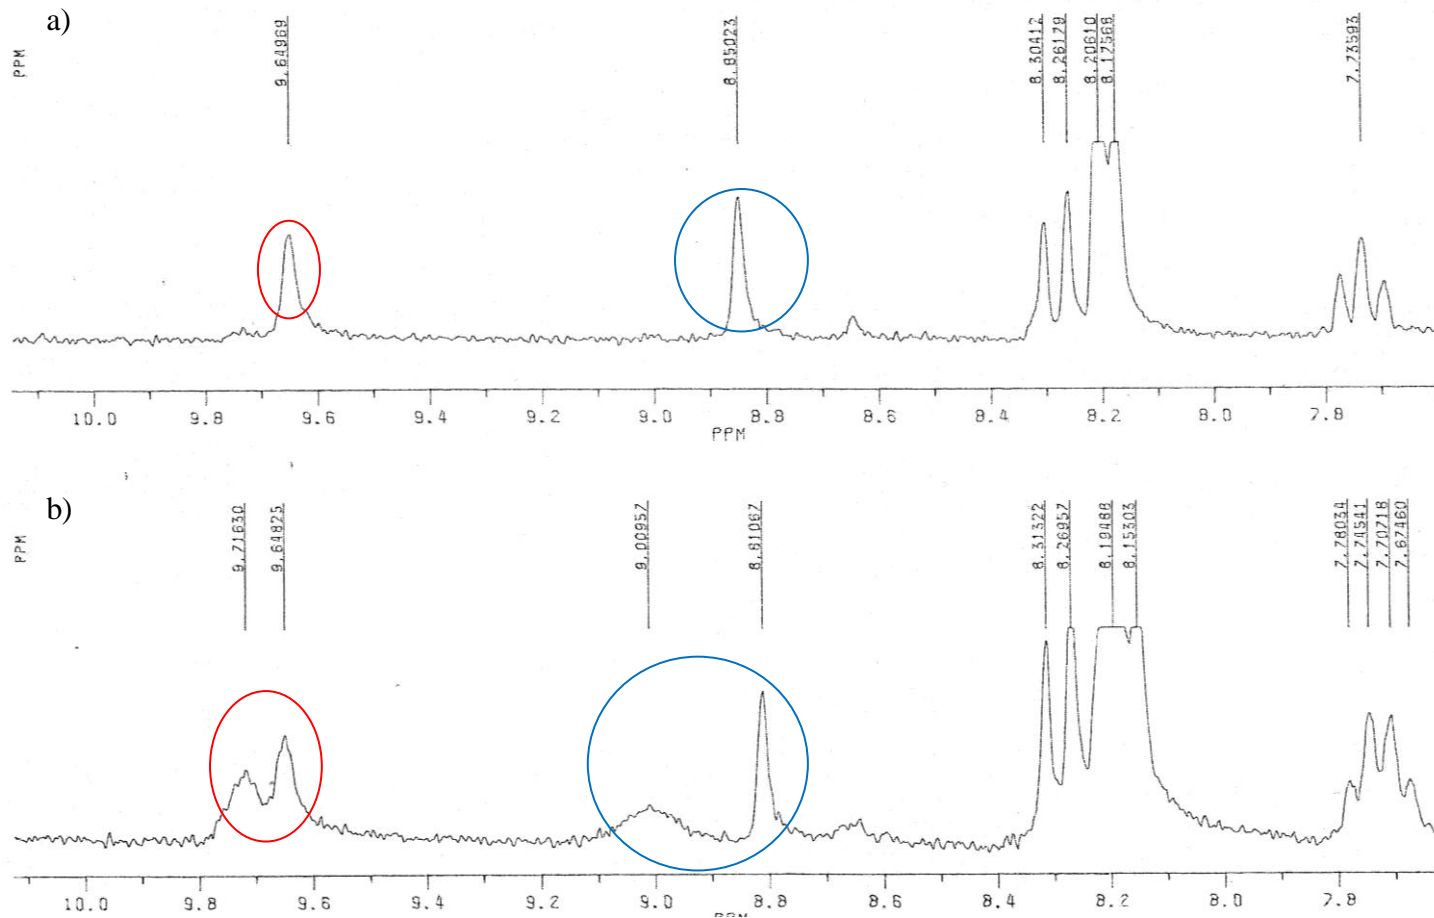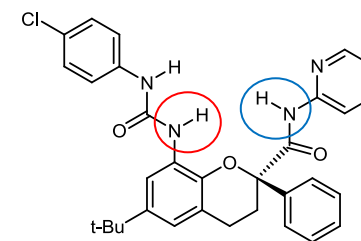

Figure S41. HPLC of extraction of *L*-proline with the receptor 1.

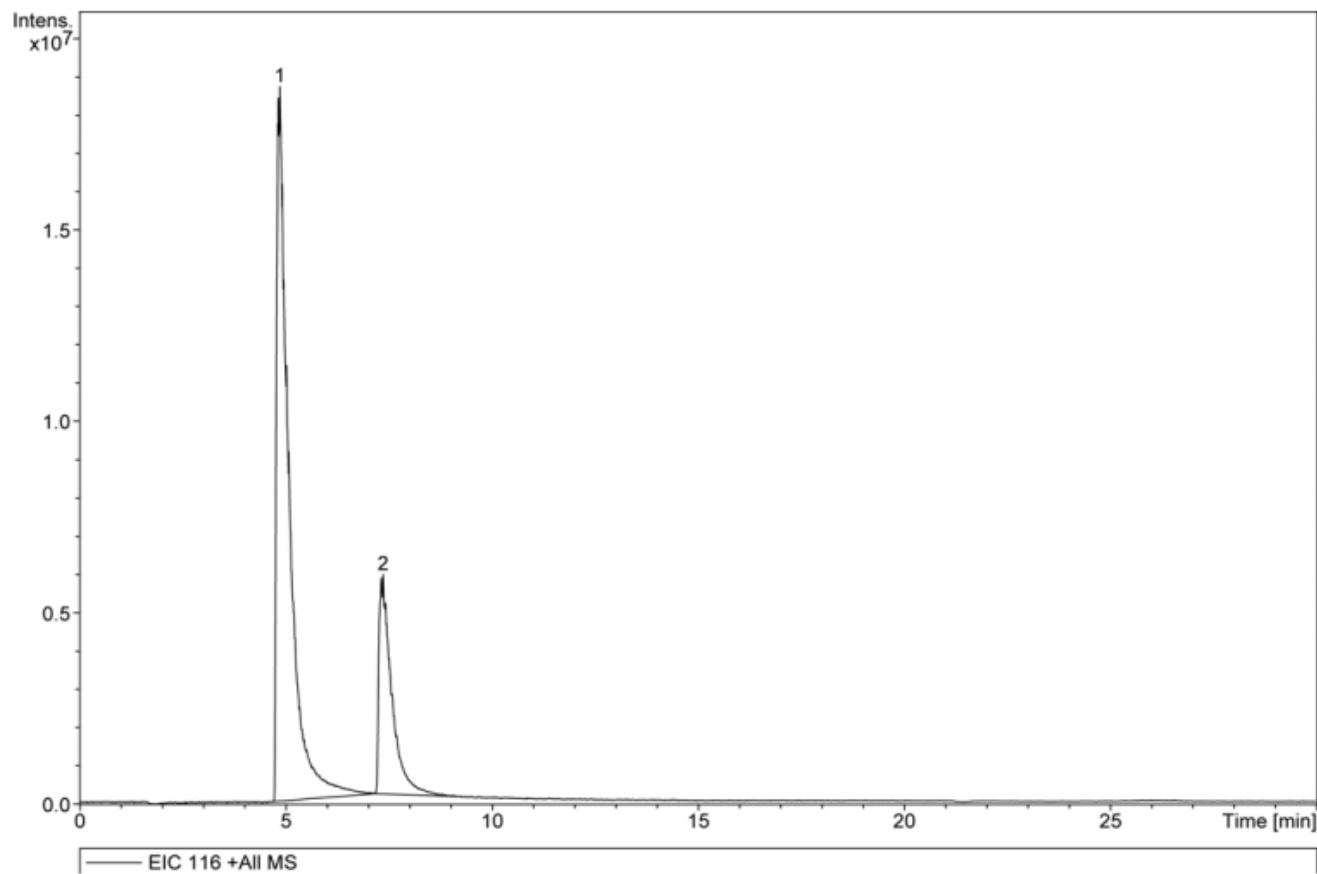

**Compound List:**

| # | RT [min] | Range [min] | Height   | Area      | Area Frac % |
|---|----------|-------------|----------|-----------|-------------|
| 1 | 4.9      | 4.7 - 7.1   | 18659609 | 389976045 | 76.0        |
| 2 | 7.4      | 7.1 - 9.2   | 5739521  | 123230053 | 24.0        |

Figure S.42. HPLC of extraction of a mixture of amino acids (*L*-proline, *L*-alanine, *L*-isoleucine, *L*-leucine, *L*-valine) with the receptor 1.

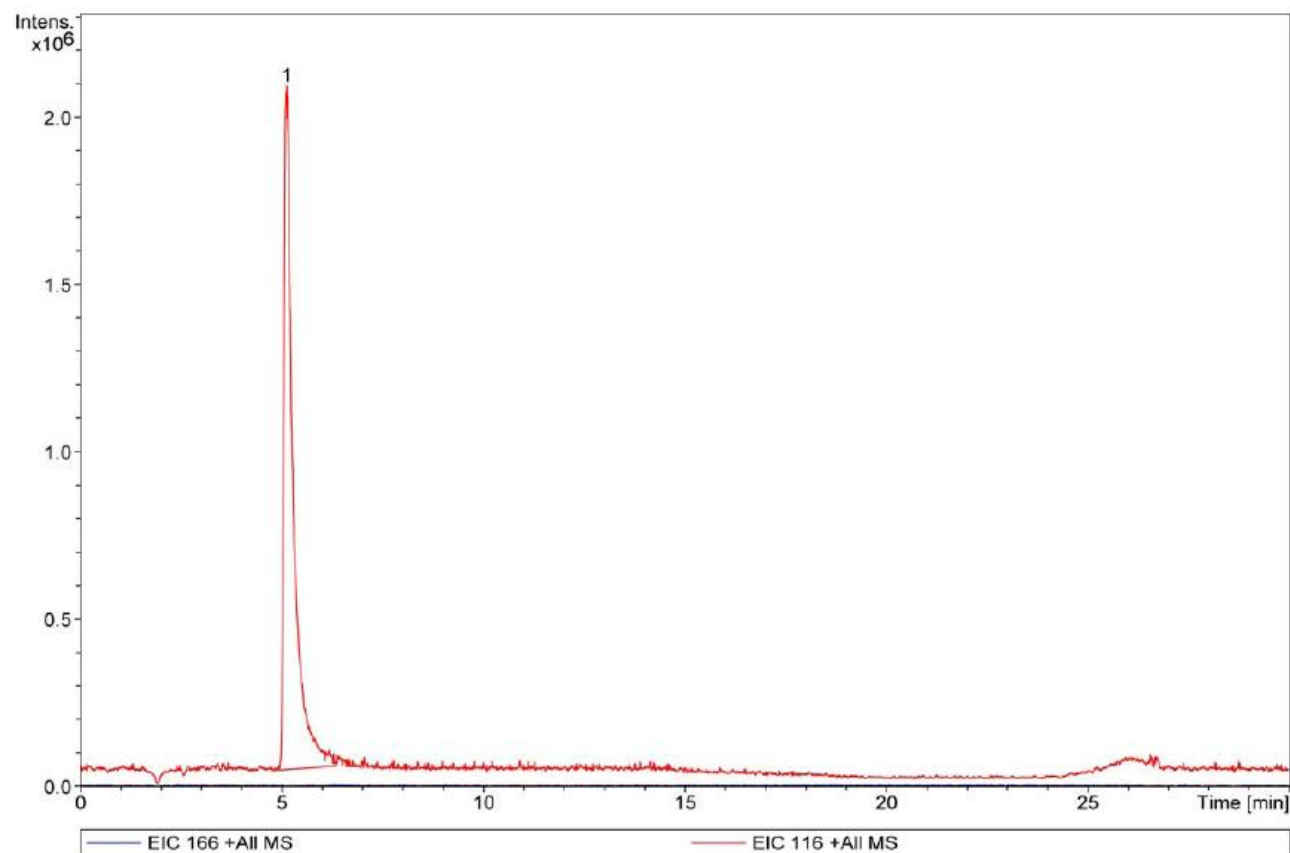

| Compound List: |          |             |         |          |             |
|----------------|----------|-------------|---------|----------|-------------|
| #              | RT [min] | Range [min] | Height  | Area     | Area Frac % |
| 1              | 5.1      | 4.9 - 6.3   | 2042436 | 33307528 | 100.0       |

**Figure S43. Modelling studies of the associates between receptor and *L*-proline.**

All calculations were performed using Gaussian09 software<sup>1</sup>. Geometry optimization were performed using M06-2X DFT functional<sup>2</sup> and 6-31G\*\* basis set<sup>3</sup> in the gas phase. Gibbs free energy correction at 298.15 K was calculated with this method and corrected according to the so-called “quasi-harmonic approach” using a free rotor approximation for vibrational modes below 100 cm<sup>-1</sup> and a rigid rotor approximation above this cutoff<sup>4</sup>. Single point energy was calculated on the optimized structures using M06-2X DFT functional<sup>2</sup> and 6-311+G\*\* basis set. Solvent (chloroform) was modeled in this single-point calculation using SMD solvation model.<sup>5</sup> The Gibbs free energy of each structure is calculated adding to this single point energy the  $\Delta G$  correction term calculated as described above.

Complex between (*R*)-receptor and *L*-proline  
Phenyl group ecuatorial:  $\Delta G$ : 0.00 kcal/mol

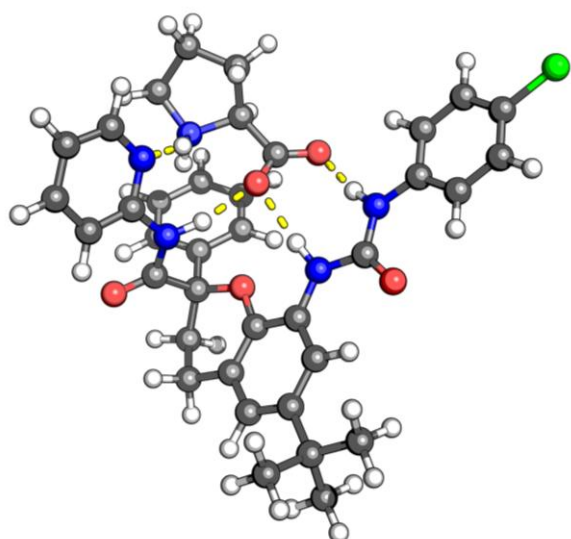

|   |          |          |          |
|---|----------|----------|----------|
| C | 1.69822  | 4.45794  | -0.37370 |
| C | 2.07251  | 3.17246  | -0.76706 |
| C | 1.11538  | 2.16838  | -0.72067 |
| C | -0.20250 | 2.41468  | -0.29776 |
| C | -0.54190 | 3.71410  | 0.08716  |
| C | 0.40192  | 4.74597  | 0.05085  |
| H | 2.44910  | 5.24369  | -0.41859 |
| H | -1.55640 | 3.88949  | 0.40865  |
| C | 2.70853  | 0.47817  | -1.28779 |
| C | 3.50829  | 1.55019  | -2.02793 |
| H | 3.04719  | 1.66510  | -3.01448 |
| H | 4.53460  | 1.20228  | -2.16367 |
| C | 3.47047  | 2.86566  | -1.25154 |
| C | 3.33717  | 0.18029  | 0.09591  |
| O | 4.50853  | 0.40721  | 0.33993  |
| N | 2.47701  | -0.47170 | 0.93464  |
| H | 1.52266  | -0.67329 | 0.60118  |
| C | 2.84701  | -1.07384 | 2.13918  |
| C | 3.82108  | -0.53928 | 2.99081  |
| C | 2.44250  | -2.82807 | 3.56866  |
| C | 4.08381  | -1.21151 | 4.17310  |
| H | 4.33887  | 0.36755  | 2.71168  |
| C | 3.37895  | -2.37457 | 4.48387  |
| H | 4.82838  | -0.82178 | 4.85960  |
| H | 3.55287  | -2.91433 | 5.40675  |

|    |          |          |          |
|----|----------|----------|----------|
| N  | 2.18767  | -2.20605 | 2.41212  |
| N  | -1.06998 | 1.32081  | -0.30381 |
| C  | -2.44000 | 1.35885  | -0.12373 |
| H  | -0.63441 | 0.39768  | -0.33457 |
| O  | -3.06925 | 2.36789  | 0.15828  |
| N  | -3.00371 | 0.11606  | -0.31265 |
| H  | -2.41637 | -0.62614 | -0.69935 |
| C  | -4.34368 | -0.23377 | -0.12570 |
| C  | -5.33011 | 0.63661  | 0.35765  |
| C  | -4.69483 | -1.55744 | -0.43578 |
| C  | -6.63373 | 0.18061  | 0.52598  |
| H  | -5.07378 | 1.65951  | 0.59050  |
| C  | -5.99624 | -2.00517 | -0.26872 |
| H  | -3.92770 | -2.22799 | -0.81317 |
| C  | -6.96284 | -1.13110 | 0.21522  |
| C  | 0.04330  | 6.17879  | 0.46081  |
| C  | 0.28351  | 7.12395  | -0.72811 |
| H  | 1.33006  | 7.11398  | -1.04609 |
| H  | -0.33254 | 6.83097  | -1.58346 |
| H  | 0.02539  | 8.15237  | -0.45269 |
| C  | -1.42201 | 6.30855  | 0.88762  |
| H  | -2.10303 | 6.02926  | 0.07825  |
| H  | -1.64647 | 5.67980  | 1.75429  |
| H  | -1.63069 | 7.34733  | 1.16182  |
| C  | 0.93120  | 6.60913  | 1.64015  |
| H  | 0.77663  | 5.94932  | 2.49934  |
| H  | 1.99248  | 6.57782  | 1.37679  |
| H  | 0.68871  | 7.63348  | 1.94354  |
| C  | 2.67645  | -0.84698 | -2.04396 |
| C  | 3.81903  | -1.65568 | -2.08232 |
| C  | 1.50654  | -1.27899 | -2.67309 |
| C  | 3.78636  | -2.88741 | -2.73437 |
| H  | 4.72682  | -1.32369 | -1.58398 |
| C  | 1.48014  | -2.50852 | -3.33116 |
| H  | 0.61228  | -0.66861 | -2.62067 |
| C  | 2.61437  | -3.31912 | -3.35898 |
| H  | 4.67743  | -3.50695 | -2.75726 |
| H  | 0.55792  | -2.83273 | -3.80402 |
| H  | 2.59024  | -4.27589 | -3.87147 |
| H  | -7.39766 | 0.85325  | 0.90042  |
| H  | -6.26308 | -3.02760 | -0.51284 |
| Cl | -8.60753 | -1.69428 | 0.43162  |
| O  | -0.06190 | -1.39487 | 0.13971  |
| C  | -0.55706 | -2.29045 | -0.59365 |
| O  | -1.54580 | -2.23170 | -1.33535 |
| C  | 0.15683  | -3.65466 | -0.52267 |
| H  | 0.17438  | -4.13166 | -1.50581 |
| C  | 0.81533  | -5.57113 | 0.80268  |
| C  | 2.07763  | -4.81245 | 0.33003  |
| H  | 1.54980  | -2.85233 | 0.78031  |
| H  | 2.15164  | -3.00659 | -0.78169 |

|   |          |          |          |
|---|----------|----------|----------|
| H | 0.89240  | -5.86033 | 1.85208  |
| H | 0.69387  | -6.48549 | 0.21850  |
| H | 2.83575  | -4.67633 | 1.10266  |
| H | 2.53648  | -5.27209 | -0.54708 |
| O | 1.36251  | 0.86834  | -1.12455 |
| H | 1.86909  | -3.73287 | 3.75834  |
| N | 1.56940  | -3.46849 | -0.07288 |
| C | -0.36006 | -4.59995 | 0.55950  |
| H | -0.57427 | -4.01178 | 1.45848  |
| H | -1.27813 | -5.09912 | 0.25056  |
| H | 4.15859  | 2.79961  | -0.40205 |
| H | 3.82383  | 3.68297  | -1.88750 |

Complex between (*R*)-receptor and *L*-proline  
Phenyl group axial:  $\Delta G$ : 1.2 kcal/mol

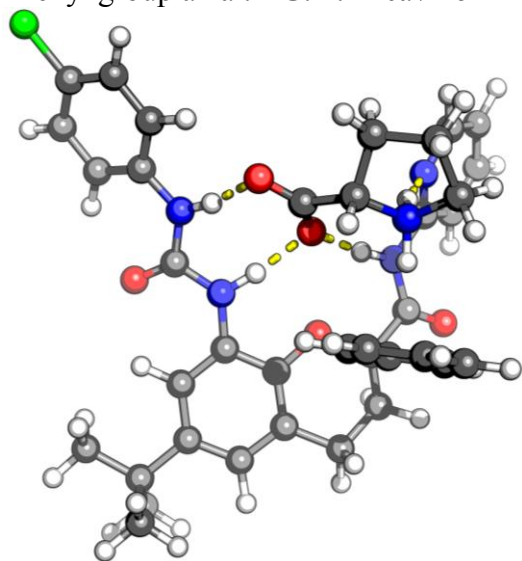

|   |          |          |          |
|---|----------|----------|----------|
| C | -0.18328 | 4.85405  | -0.19531 |
| C | -1.02262 | 3.76943  | -0.44130 |
| C | -0.45563 | 2.50676  | -0.57926 |
| C | 0.92183  | 2.30023  | -0.39343 |
| C | 1.73503  | 3.41286  | -0.15562 |
| C | 1.19724  | 4.69861  | -0.06775 |
| H | -0.63543 | 5.83922  | -0.10745 |
| H | 2.79475  | 3.23997  | -0.04587 |
| C | -2.60017 | 1.44483  | -0.78121 |
| C | -3.13627 | 2.77585  | -1.30932 |
| H | -4.22635 | 2.77246  | -1.24799 |
| H | -2.87136 | 2.83554  | -2.36951 |
| C | -2.51929 | 3.93173  | -0.53518 |
| C | -3.15687 | 0.29595  | -1.64976 |
| O | -4.14830 | 0.44036  | -2.34007 |
| N | -2.50040 | -0.88764 | -1.46808 |
| H | -1.68322 | -0.91681 | -0.83234 |
| C | -2.91365 | -2.11127 | -1.99363 |
| C | -3.55121 | -2.24206 | -3.23377 |
| C | -2.95408 | -4.38887 | -1.64653 |
| C | -3.88132 | -3.51783 | -3.65973 |
| H | -3.77030 | -1.36000 | -3.81858 |
| C | -3.57174 | -4.62189 | -2.86370 |
| H | -4.36884 | -3.65430 | -4.61960 |
| H | -3.80727 | -5.63199 | -3.17575 |
| N | -2.64205 | -3.16314 | -1.21032 |
| N | 1.37674  | 0.98074  | -0.38697 |
| C | 2.70256  | 0.58726  | -0.45965 |
| H | 0.67189  | 0.24759  | -0.29667 |
| O | 3.61532  | 1.32961  | -0.78669 |
| N | 2.85637  | -0.74059 | -0.12597 |

|    |          |          |          |
|----|----------|----------|----------|
| H  | 2.09455  | -1.19588 | 0.37906  |
| C  | 4.05343  | -1.46541 | -0.15047 |
| C  | 5.21824  | -1.03876 | -0.80130 |
| C  | 4.04856  | -2.70958 | 0.49720  |
| C  | 6.34980  | -1.84847 | -0.79496 |
| H  | 5.23683  | -0.07829 | -1.29534 |
| C  | 5.17872  | -3.51358 | 0.49852  |
| H  | 3.14521  | -3.03003 | 1.00780  |
| C  | 6.32784  | -3.07690 | -0.14983 |
| C  | 2.07798  | 5.92854  | 0.17539  |
| C  | 1.64676  | 6.61827  | 1.48013  |
| H  | 0.60435  | 6.94737  | 1.43707  |
| H  | 1.75100  | 5.93605  | 2.32933  |
| H  | 2.27011  | 7.49936  | 1.66760  |
| C  | 3.56094  | 5.56272  | 0.29027  |
| H  | 3.74578  | 4.89214  | 1.13489  |
| H  | 3.92667  | 5.07535  | -0.61835 |
| H  | 4.14986  | 6.47158  | 0.44827  |
| C  | 1.91132  | 6.90969  | -0.99694 |
| H  | 2.20986  | 6.43922  | -1.93846 |
| H  | 0.87392  | 7.24167  | -1.09875 |
| H  | 2.53540  | 7.79638  | -0.84055 |
| C  | -3.03160 | 1.15183  | 0.65942  |
| C  | -4.37976 | 0.89185  | 0.93432  |
| C  | -2.09377 | 1.06893  | 1.69262  |
| C  | -4.78521 | 0.54872  | 2.22203  |
| H  | -5.10525 | 0.93351  | 0.12504  |
| C  | -2.50676 | 0.74498  | 2.98613  |
| H  | -1.04284 | 1.22875  | 1.48134  |
| C  | -3.84846 | 0.47738  | 3.25410  |
| H  | -5.83240 | 0.34305  | 2.42057  |
| H  | -1.77160 | 0.69918  | 3.78401  |
| H  | -4.16411 | 0.22390  | 4.26143  |
| H  | 7.25370  | -1.52037 | -1.29652 |
| H  | 5.17161  | -4.47325 | -1.00345 |
| Cl | 7.75919  | -4.08439 | -0.14988 |
| O  | -0.42498 | -1.20027 | 0.30823  |
| C  | -0.10880 | -1.91275 | 1.30129  |
| O  | 1.01523  | -2.21573 | 1.70901  |
| C  | -1.28616 | -2.45628 | 2.13211  |
| H  | -1.34190 | -1.91728 | 3.08477  |
| C  | -2.77137 | -4.24980 | 2.74700  |
| C  | -3.59898 | -3.12013 | 2.08706  |
| H  | -2.45770 | -2.57483 | 0.42141  |
| H  | -2.84775 | -1.25384 | 1.39231  |
| H  | -3.10342 | -5.23550 | 2.41745  |
| H  | -2.89303 | -4.20747 | 3.83163  |
| H  | -4.29681 | -3.46978 | 1.32395  |
| H  | -4.14291 | -2.51658 | 2.81526  |
| O  | -1.19040 | 1.37309  | -0.88862 |
| H  | -2.69912 | -5.20963 | -0.98032 |
| N  | -2.58513 | -2.24523 | 1.42382  |
| C  | -1.30915 | -3.96250 | 2.35650  |
| H  | -1.04227 | -4.46504 | 1.42007  |
| H  | -0.58437 | -4.26246 | 3.11223  |
| H  | -2.76292 | 4.88242  | -1.01858 |
| H  | -2.94875 | 3.97145  | 0.47495  |

Complex between (*S*)-receptor and *L*-proline  
 Phenyl group ecuatorial:  $\Delta G$ : 0.5 kcal/mol

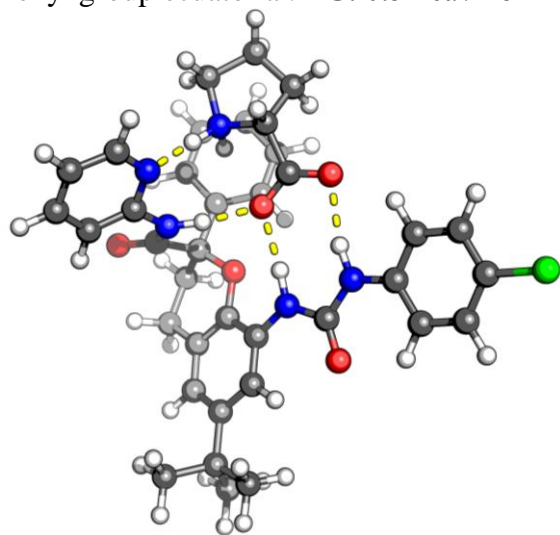

|   |          |          |          |
|---|----------|----------|----------|
| C | 1.20116  | 4.49175  | -0.64261 |
| C | 1.69882  | 3.23941  | -1.00252 |
| C | 0.86028  | 2.13764  | -0.88679 |
| C | -0.46559 | 2.26060  | -0.43480 |
| C | -0.92673 | 3.53123  | -0.07901 |
| C | -0.10252 | 4.65569  | -0.17802 |
| H | 1.86183  | 5.35053  | -0.74045 |
| H | -1.94454 | 3.61251  | 0.26710  |
| C | 2.64209  | 0.62079  | -1.31794 |
| C | 3.32531  | 1.70651  | -2.15147 |
| H | 2.87452  | 1.66145  | -3.14846 |
| H | 4.38927  | 1.47777  | -2.24401 |
| C | 3.11199  | 3.07837  | -1.51375 |
| C | 3.25055  | 0.55855  | 0.10408  |
| O | 4.35941  | 0.93350  | 0.35541  |
| N | 2.47155  | -0.13751 | 0.98896  |
| H | 1.57734  | -0.53531 | 0.65701  |
| C | 2.88610  | -0.49298 | 2.27371  |
| C | 3.65001  | 0.35668  | 3.08269  |
| C | 2.80719  | -2.10745 | 3.91443  |
| C | 3.98263  | -0.08242 | 4.35258  |
| H | 3.96019  | 1.32007  | 2.70284  |
| C | 3.54781  | -1.33399 | 4.79166  |
| H | 4.57023  | 0.55438  | 5.00580  |
| H | 3.78103  | -1.70083 | 5.78374  |
| N | 2.49242  | -1.70788 | 2.67573  |
| N | -1.22147 | 1.08754  | -0.35352 |
| C | -2.59672 | 1.02753  | -0.22544 |
| H | -0.70146 | 0.20786  | -0.36788 |
| O | -3.31671 | 2.01438  | -0.17538 |
| N | -3.06195 | -0.26824 | -0.16753 |
| H | -2.39669 | -1.04027 | -0.23199 |
| C | -4.39979 | -0.66508 | -0.03044 |
| C | -5.48848 | 0.21697  | 0.01784  |
| C | -4.63877 | -2.04559 | 0.06011  |
| C | -6.78024 | -0.28278 | 0.15493  |
| H | -5.32049 | 1.28092  | -0.05151 |
| C | -5.92838 | -2.53675 | 0.19559  |
| H | -3.79643 | -2.72846 | 0.02249  |
| C | -6.99705 | -1.64994 | 0.24303  |
| C | -0.59735 | 6.05447  | 0.20470  |
| C | -0.53680 | 6.96955  | -1.02966 |
| H | 0.48232  | 7.05301  | -1.41846 |
| H | -1.17272 | 6.57895  | -1.82967 |
| H | -0.88426 | 7.97615  | -0.77243 |
| C | -2.03933 | 6.03617  | 0.72161  |

|    |          |          |          |
|----|----------|----------|----------|
| H  | -2.73373 | 5.65113  | -0.03074 |
| H  | -2.13468 | 5.41954  | 1.62062  |
| H  | -2.34796 | 7.05456  | 0.97772  |
| C  | 0.30379  | 6.63101  | 1.30919  |
| H  | 0.28091  | 5.99269  | 2.19772  |
| H  | 1.34328  | 6.71331  | 0.97890  |
| H  | -0.03948 | 7.63143  | 1.59431  |
| C  | 2.81955  | -0.76052 | -1.93970 |
| C  | 4.06169  | -1.39998 | -1.85958 |
| C  | 1.75910  | -1.39395 | -2.59237 |
| C  | 4.24372  | -2.65811 | -2.42934 |
| H  | 4.88499  | -0.90676 | -1.34816 |
| C  | 1.94679  | -2.65415 | -3.16158 |
| H  | 0.79300  | -0.90469 | -2.62861 |
| C  | 3.18466  | -3.29022 | -3.08148 |
| H  | 5.21530  | -3.13968 | -2.37103 |
| H  | 1.12105  | -3.13360 | -3.67862 |
| H  | 3.32880  | -4.26393 | -3.54000 |
| H  | -7.62252 | 0.39959  | 0.19110  |
| H  | -6.10569 | -3.60435 | 0.26504  |
| Cl | -8.62761 | -2.26686 | 0.41338  |
| O  | 0.16371  | -1.41969 | 0.06022  |
| C  | -0.38235 | -2.55821 | 0.05366  |
| O  | -1.55081 | -2.85319 | -0.20702 |
| C  | 0.55217  | -3.73484 | 0.39100  |
| H  | 0.32358  | -4.11286 | 1.39339  |
| C  | 2.82772  | -4.48369 | 0.28911  |
| H  | 2.15769  | -2.70352 | 1.29743  |
| H  | 2.09576  | -2.62392 | -0.37714 |
| C  | 1.97916  | -5.49434 | -0.51395 |
| H  | 0.43211  | -4.42984 | -1.63441 |
| H  | -0.23696 | -5.56541 | -0.46836 |
| H  | 3.76652  | -4.20643 | -0.19028 |
| H  | 3.03459  | -4.83702 | 1.30173  |
| H  | 2.41901  | -5.67415 | -1.49664 |
| H  | 1.94404  | -6.45016 | 0.01228  |
| N  | 1.97297  | -3.26910 | 0.41586  |
| C  | 0.57574  | -4.86055 | -0.64013 |
| O  | 1.25292  | 0.85605  | -1.23398 |
| H  | 2.45191  | -3.09373 | 4.20119  |
| H  | 3.82207  | 3.20530  | -0.69028 |
| H  | 3.32531  | 3.86402  | -2.24525 |



Complex between (*S*)-receptor and *L*-proline  
 Phenyl group axial:  $\Delta G$ : 1.8 kcal/mol

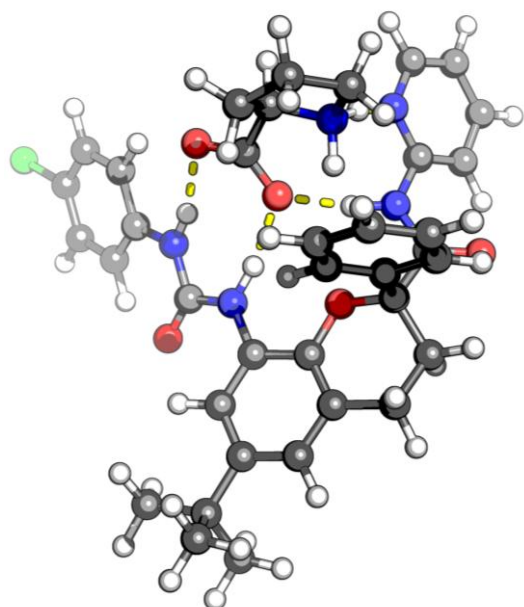

|   |          |          |          |
|---|----------|----------|----------|
| C | -0.93296 | 4.62593  | -0.46795 |
| C | -1.55852 | 3.40367  | -0.70498 |
| C | -0.79299 | 2.24148  | -0.66556 |
| C | 0.57445  | 2.28457  | -0.34504 |
| C | 1.16803  | 3.52906  | -0.11351 |
| C | 0.42974  | 4.71142  | -0.18212 |
| H | -1.54024 | 5.52666  | -0.52066 |
| H | 2.22375  | 3.54072  | 0.11093  |
| C | -2.71398 | 0.84618  | -1.01553 |
| C | -3.34374 | 2.02981  | -1.75352 |
| H | -4.41593 | 1.85973  | -1.86176 |
| H | -2.91370 | 2.05389  | -2.76014 |
| C | -3.03352 | 3.31948  | -1.00840 |
| C | -2.99980 | -0.44719 | -1.80409 |
| O | -3.96002 | -0.53190 | -2.54668 |
| N | -2.16504 | -1.48776 | -1.50363 |
| H | -1.37841 | -1.33291 | -0.85375 |
| C | -2.34295 | -2.78522 | -1.99815 |
| C | -2.77412 | -3.04028 | -3.30491 |
| C | -2.15370 | -5.03493 | -1.54323 |
| C | -2.88336 | -4.36065 | -3.70755 |
| H | -3.01114 | -2.21375 | -3.95999 |
| C | -2.55730 | -5.38653 | -2.81981 |
| H | -3.20866 | -4.59094 | -4.71685 |
| H | -2.61904 | -6.42883 | -3.10800 |
| N | -2.06186 | -3.76447 | -1.13051 |
| N | 1.25166  | 1.07077  | -0.21801 |
| C | 2.62336  | 0.91180  | -0.29857 |
| H | 0.68171  | 0.23153  | -0.09528 |
| O | 3.39040  | 1.79499  | -0.65024 |
| N | 3.01077  | -0.36224 | 0.05833  |
| H | 2.33458  | -0.95717 | 0.53976  |
| C | 4.31048  | -0.87882 | 0.00493  |
| C | 5.38497  | -0.24020 | -0.62863 |
| C | 4.51755  | -2.13080 | 0.60429  |
| C | 6.63496  | -0.84975 | -0.65467 |
| H | 5.23938  | 0.72729  | -1.08564 |
| C | 5.76591  | -2.73396 | 0.57472  |
| H | 3.68343  | -2.62100 | 1.09733  |
| C | 6.82221  | -2.08813 | -0.05697 |
| C | 1.07436  | 6.08259  | 0.04428  |
| C | 0.37100  | 6.79694  | 1.21004  |

|    |          |          |          |
|----|----------|----------|----------|
| H  | -0.69169 | 6.95564  | 1.00480  |
| H  | 0.45368  | 6.20944  | 2.12953  |
| H  | 0.82904  | 7.77656  | 1.38457  |
| C  | 2.56566  | 5.96995  | 0.37611  |
| H  | 2.73067  | 5.40346  | 1.29776  |
| H  | 3.12150  | 5.48106  | -0.42942 |
| H  | 2.98460  | 6.97105  | 0.51731  |
| C  | 0.92669  | 6.92636  | -1.23281 |
| H  | 1.41941  | 6.43519  | -2.07706 |
| H  | -0.12464 | 7.07650  | -1.49525 |
| H  | 1.38387  | 7.91180  | -1.09121 |
| C  | -3.31059 | 0.65002  | 0.38284  |
| C  | -4.67519 | 0.37013  | 0.51788  |
| C  | -2.51140 | 0.73395  | 1.52665  |
| C  | -5.23939 | 0.20034  | 1.77892  |
| H  | -5.29043 | 0.27630  | -0.37353 |
| C  | -3.08315 | 0.56451  | 2.78983  |
| H  | -1.44664 | 0.91551  | 1.42493  |
| C  | -4.44549 | 0.30544  | 2.92092  |
| H  | -6.30094 | -0.00729 | 1.87008  |
| H  | -2.46075 | 0.65892  | 3.67523  |
| H  | -4.88775 | 0.19051  | 3.90593  |
| H  | 7.46740  | -0.35686 | -1.14496 |
| H  | 5.92140  | -3.70088 | 1.04049  |
| C1 | 8.40135  | -2.84563 | -0.09781 |
| O  | -0.22594 | -1.26422 | 0.51143  |
| C  | 0.23577  | -2.09331 | 1.35084  |
| O  | 1.40282  | -2.28503 | 1.69088  |
| C  | -0.84143 | -2.91248 | 2.08957  |
| H  | -0.61897 | -3.98211 | 2.03870  |
| C  | -3.22478 | -3.03807 | 2.43212  |
| H  | -2.20256 | -3.18352 | 0.51106  |
| H  | -2.18286 | -1.67522 | 1.21396  |
| C  | -2.55591 | -2.85727 | 3.81460  |
| H  | -0.98964 | -1.35831 | 3.55897  |
| H  | -0.37534 | -2.87686 | 4.21636  |
| H  | -4.08595 | -2.38898 | 2.26945  |
| H  | -3.51556 | -4.07371 | 2.24760  |
| H  | -3.07514 | -2.09629 | 4.40058  |
| H  | -2.59718 | -3.79431 | 4.37350  |
| N  | -2.16659 | -2.68048 | 1.44374  |
| C  | -1.09768 | -2.44741 | 3.52289  |
| O  | -1.30671 | 0.98173  | -0.93901 |
| H  | -1.89981 | -5.79358 | -0.80757 |
| H  | -3.34039 | 4.18452  | -1.60344 |
| H  | -3.61011 | 3.35482  | -0.07459 |

## Determination of the absolute configuration of the receptor by simulation of ECD spectra.

All calculations were performed using Gaussian09 software<sup>1</sup>. 16 different conformations corresponding for the structure of the R receptor shown were optimized using M06-2X DFT functional<sup>2</sup> and 6-31G\*\* basis set.<sup>3</sup> Gibbs free energy at 298.15 K was calculated for each structure from the Gaussian output files, corrected according to the so-called “quasi-harmonic approach” using a free-rotor approximation for vibrational modes below 100 cm<sup>-1</sup> and a rigid rotor approximation above this cutoff<sup>4</sup>. For the optimized structures a time-dependent DFT calculation, including the 50 more stable singlet excited states, was performed using B98 functional<sup>6</sup> and 6-31G\*\*. This functional was chosen after considering its performance in the Truhlar benchmark database VES21 for electronic excitation energies involving valence excited states.<sup>2</sup> For each structure, the ECD spectra was simulated using a value of  $\eta=0.4$  using Gausssum software<sup>7</sup>, and the absorbance was averaged considering the Maxwell-Boltzmann relative population of each structure from the Gibbs free energy calculated as described above at 298.15 K.

Simulated ECD:

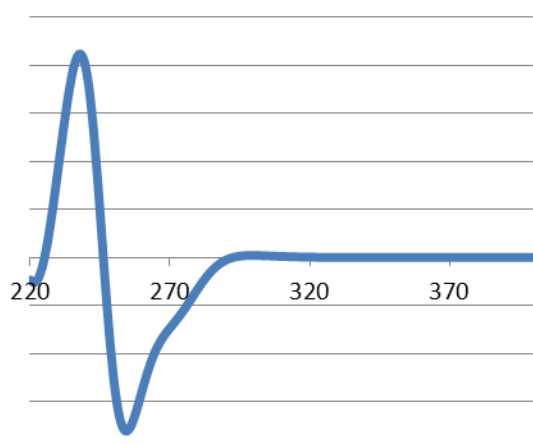

Experimental ECD:

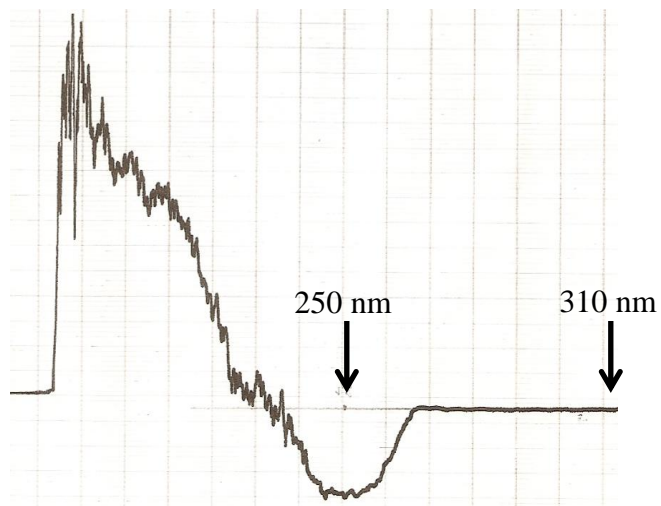

### Conformation 1: $\Delta G$ : 0.559606697

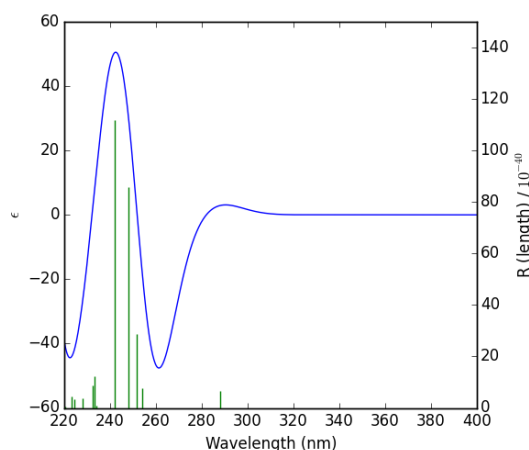

|    |          |          |          |
|----|----------|----------|----------|
| H  | 1.76146  | 5.36706  | -1.73939 |
| H  | 1.95998  | 6.55796  | -0.44683 |
| C  | 4.21831  | 5.07198  | -0.55183 |
| H  | 4.26741  | 4.89089  | -1.62982 |
| H  | 5.03710  | 4.52201  | -0.07916 |
| H  | 4.38342  | 6.13986  | -0.37353 |
| H  | -5.86458 | 2.37824  | -0.51883 |
| H  | -5.80925 | -1.90607 | -0.63091 |
| C1 | -7.61474 | 0.19856  | 0.05951  |
| C  | 2.39632  | -3.24470 | -0.55130 |
| C  | 2.22322  | -3.45582 | -1.91898 |
| C  | 2.43364  | -4.33951 | 0.31602  |
| C  | 2.07668  | -4.75007 | -2.41241 |
| H  | 2.21252  | -2.60732 | -2.59347 |
| C  | 2.28789  | -5.62981 | -0.18209 |
| H  | 2.56949  | -4.17464 | 1.38132  |
| C  | 2.10617  | -5.83885 | -1.54707 |
| H  | 1.94209  | -4.90592 | -3.47819 |
| H  | 2.31345  | -6.47389 | 0.49940  |
| H  | 1.99070  | -6.84597 | -1.93422 |
| H  | -3.59520 | 0.14208  | 1.36086  |
| O  | 2.12961  | -0.92370 | -0.98965 |
| H  | 5.36229  | 0.13771  | 0.62340  |
| H  | 4.11573  | -0.10387 | 1.84290  |

|   |          |          |          |
|---|----------|----------|----------|
| C | 3.54157  | 2.22544  | 0.28559  |
| C | 3.40780  | 0.85243  | 0.08120  |
| C | 2.34034  | 0.41105  | -0.69152 |
| C | 1.37912  | 1.30504  | -1.17515 |
| C | 1.54987  | 2.67148  | -0.97489 |
| C | 2.64078  | 3.15121  | -0.24479 |
| H | 4.37774  | 2.56740  | 0.89159  |
| H | 0.79493  | 3.33722  | -1.36590 |
| C | 2.60287  | -1.84076 | -0.00254 |
| C | 4.08453  | -1.57313 | 0.27191  |
| H | 4.44637  | -2.29995 | 1.00199  |
| H | 4.60520  | -1.75262 | -0.67435 |
| C | 4.31447  | -0.14450 | 0.76599  |
| C | 1.74737  | -1.66934 | 1.27788  |
| O | 2.19378  | -1.91877 | 2.38406  |
| N | 0.47237  | -1.28381 | 1.00095  |
| H | 0.26251  | -1.06328 | 0.03590  |
| C | -0.58924 | -0.98842 | 1.86456  |
| C | -0.52259 | -1.13868 | 3.25231  |
| C | -2.73869 | -0.21780 | 1.92823  |
| C | -1.65576 | -0.79129 | 3.97558  |
| H | 0.38202  | -1.50535 | 3.71693  |
| C | -2.78659 | -0.31958 | 3.31443  |
| H | -1.65176 | -0.88875 | 5.05672  |
| H | -3.68311 | -0.03872 | 3.85397  |
| N | -1.66519 | -0.54816 | 1.20910  |
| N | 0.24344  | 0.75553  | -1.81133 |
| C | -1.04610 | 1.18379  | -1.51798 |
| H | 0.37232  | -0.18772 | -2.14938 |
| O | -1.29537 | 2.25891  | -1.01647 |
| N | -2.01248 | 0.26319  | -1.90448 |
| H | -1.67963 | -0.67504 | -2.07542 |
| C | -3.34024 | 0.29969  | -1.43970 |
| C | -4.02335 | 1.49424  | -1.18886 |
| C | -3.99635 | -0.91924 | -1.24132 |
| C | -5.33356 | 1.45517  | -0.72303 |
| H | -3.52345 | 2.44066  | -1.33582 |
| C | -5.30786 | -0.95822 | -0.78952 |
| H | -3.46589 | -1.85102 | -1.41735 |
| C | -5.96939 | 0.23546  | -0.52485 |
| C | 2.85230  | 4.64640  | 0.01064  |
| C | 2.81828  | 4.91177  | 1.52510  |
| H | 3.61105  | 4.36834  | 2.04720  |
| H | 1.85899  | 4.60123  | 1.94951  |
| H | 2.95563  | 5.97989  | 1.72418  |
| C | 1.76784  | 5.50078  | -0.65310 |
| H | 0.77224  | 5.25774  | -0.26943 |

### Conformation 2: $\Delta G$ : 0.502522158

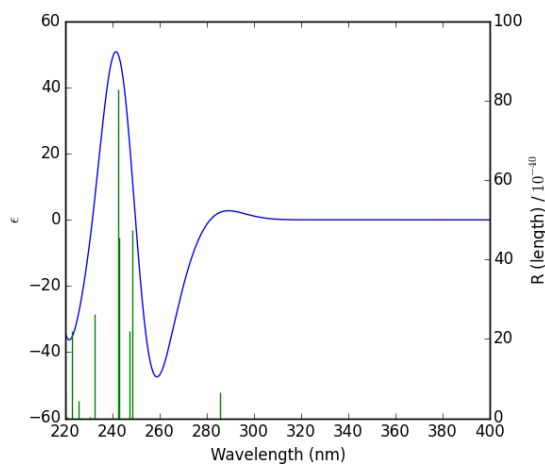

|   |          |          |          |
|---|----------|----------|----------|
| C | 3.49872  | 2.30268  | 0.30138  |
| C | 3.39952  | 0.92286  | 0.08273  |
| C | 2.34841  | 0.45735  | -0.69016 |
| C | 1.36004  | 1.32979  | -1.17203 |
| C | 1.49616  | 2.69265  | -0.96098 |
| C | 2.57400  | 3.20103  | -0.22068 |
| H | 4.32626  | 2.65420  | 0.90939  |
| H | 0.72585  | 3.34805  | -1.34510 |
| C | 2.66567  | -1.78670 | -0.00523 |
| C | 4.14131  | -1.48419 | 0.26494  |
| H | 4.52273  | -2.20228 | 0.99366  |
| H | 4.66298  | -1.65114 | -0.68303 |
| C | 4.33848  | -0.05017 | 0.75799  |
| C | 1.81020  | -1.63176 | 1.27751  |
| O | 2.26676  | -1.86166 | 2.38367  |
| N | 0.52399  | -1.28312 | 1.00233  |
| H | 0.30642  | -1.07441 | 0.03645  |
| C | -0.53936 | -0.99961 | 1.86766  |
| C | -0.46381 | -1.13469 | 3.25652  |
| C | -2.70219 | -0.26740 | 1.93369  |
| H | -1.59967 | -0.80009 | 3.98160  |
| H | 0.44939  | -1.48024 | 3.72064  |
| C | -2.74180 | -0.35538 | 3.32107  |
| H | -1.58895 | -0.88630 | 5.06365  |

|    |          |          |          |
|----|----------|----------|----------|
| H  | -3.64057 | -0.08462 | 3.86198  |
| N  | -1.62625 | -0.58586 | 1.21282  |
| N  | 0.23802  | 0.75167  | -1.80551 |
| C  | -1.06082 | 1.15403  | -1.51671 |
| H  | 0.38809  | -0.18918 | -2.14152 |
| O  | -1.33402 | 2.22743  | -1.02371 |
| N  | -2.00634 | 0.20987  | -1.89725 |
| H  | -1.65243 | -0.72248 | -2.05798 |
| C  | -3.33501 | 0.21990  | -1.43348 |
| C  | -4.04524 | 1.40002  | -1.19026 |
| C  | -3.96348 | -1.01250 | -1.22851 |
| C  | -5.35492 | 1.33382  | -0.72575 |
| H  | -3.56661 | 2.35663  | -1.34174 |
| C  | -5.27440 | -1.07869 | -0.77821 |
| H  | -3.41195 | -1.93299 | -1.39913 |
| C  | -5.96325 | 0.10118  | -0.52139 |
| C  | 2.65931  | 4.71245  | 0.00548  |
| C  | 3.89508  | 5.10558  | 0.82029  |
| H  | 4.82069  | 4.80628  | 0.31801  |
| H  | 3.87986  | 4.65527  | 1.81787  |
| H  | 3.91865  | 6.19209  | 0.94610  |
| C  | 1.40538  | 5.17798  | 0.76477  |
| H  | 1.34756  | 4.69490  | 1.74482  |
| H  | 0.48950  | 4.93519  | 0.21884  |
| H  | 1.43654  | 6.26240  | 0.91545  |
| C  | 2.72895  | 5.42670  | -1.35447 |
| H  | 1.84777  | 5.21258  | -1.96508 |
| H  | 3.61425  | 5.10993  | -1.91442 |
| H  | 2.78248  | 6.51079  | -1.20882 |
| H  | -5.90669 | 2.24579  | -0.52661 |
| H  | -5.75463 | -2.03668 | -0.61511 |
| Cl | -7.60767 | 0.03029  | 0.06161  |
| C  | 2.48832  | -3.19556 | -0.55116 |
| C  | 2.31622  | -3.41301 | -1.91798 |
| C  | 2.54972  | -4.28756 | 0.31829  |
| C  | 2.19385  | -4.71092 | -2.40835 |
| H  | 2.28699  | -2.56625 | -2.59418 |
| C  | 2.42815  | -5.58153 | -0.17672 |
| H  | 2.68478  | -4.11774 | 1.38295  |
| C  | 2.24689  | -5.79704 | -1.54078 |
| H  | 2.05950  | -4.87167 | -3.47343 |
| H  | 2.47194  | -6.42342 | 0.50659  |
| H  | 2.14978  | -6.80709 | -1.92536 |
| H  | -3.56761 | 0.07100  | 1.36671  |
| O  | 2.16867  | -0.88128 | -0.99166 |
| H  | 5.37712  | 0.25933  | 0.60424  |
| H  | 4.15081  | -0.01416 | 1.83708  |

### Conformation 3: $\Delta G$ : 4.687703043

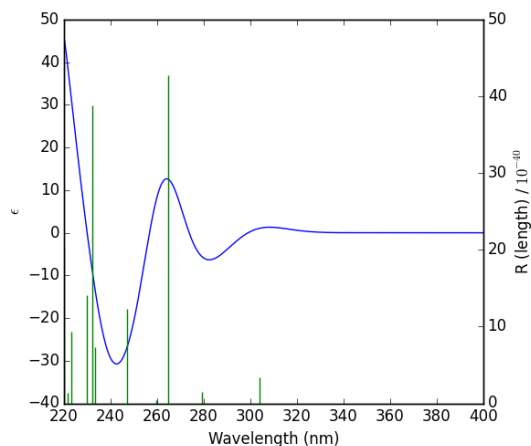

|   |          |          |          |
|---|----------|----------|----------|
| C | -0.66960 | 3.98286  | -0.75135 |
| H | -1.34788 | 2.76427  | -0.73774 |
| H | -0.60817 | 1.60549  | -0.54989 |
| H | 0.78712  | 1.64261  | -0.41172 |
| C | 1.43994  | 2.87374  | -0.42793 |
| H | 0.71376  | 4.05940  | -0.59042 |
| H | -1.25186 | 4.88962  | -0.89845 |
| H | 2.51223  | 2.88202  | -0.31058 |
| H | -2.55329 | 0.26172  | -0.29018 |
| H | -3.26444 | 1.23666  | -1.24467 |
| C | -4.34918 | 1.11305  | -1.19020 |
| C | -2.95337 | 0.95614  | -2.25645 |
| C | -2.84291 | 2.67293  | -0.93221 |
| C | -2.89880 | -1.18953 | -0.72009 |
| C | -2.17380 | -1.80546 | -1.47378 |
| H | -4.09481 | -1.64655 | -0.24425 |
| H | -4.57674 | -1.11158 | 0.46800  |
| H | -4.73957 | -2.85686 | -0.54301 |
| C | -4.23259 | -3.80609 | -3.43886 |
| H | -6.59410 | -4.11115 | -0.09882 |
| H | -4.98828 | -4.95192 | -1.64150 |
| H | -3.29033 | -3.63706 | -1.93758 |
| H | -6.19328 | -5.12095 | -0.96534 |
| H | -4.63070 | -5.71236 | -2.32865 |
| H | -6.80416 | -6.00537 | -1.10212 |
| N | -5.89138 | -2.99926 | 0.11397  |
| N | 1.40552  | 0.38716  | -0.28950 |
| C | 2.74645  | 0.13947  | -0.10047 |
| H | 0.77187  | -0.38748 | -0.43547 |
| O | 3.58196  | 1.00345  | 0.09471  |
| N | 3.03459  | -1.21485 | -0.14727 |
| H | 2.28416  | -1.84265 | -0.39359 |
| C | 4.29031  | -1.82383 | 0.00077  |
| C | 5.45327  | -1.13346 | 0.36280  |
| C | 4.35764  | -3.20512 | -0.21928 |
| C | 6.65201  | -1.82591 | 0.49375  |
| H | 5.41505  | -0.06799 | 0.53276  |
| C | 5.55452  | -3.89309 | -0.08529 |
| H | 3.46064  | -3.75060 | -0.50093 |
| C | 6.70212  | -3.19538 | 0.27108  |
| C | 1.40209  | 5.42866  | -0.61264 |
| C | 0.82668  | 6.30721  | 0.51045  |
| H | -0.24914 | 6.46318  | 0.38904  |
| H | 0.99274  | 5.84377  | 1.48752  |
| H | 1.31109  | 7.28961  | 0.50766  |
| C | 2.91604  | 5.31717  | -0.40778 |
| H | 3.15878  | 4.85264  | 0.55277  |
| H | 3.38885  | 4.73079  | -1.20139 |
| H | 3.36043  | 6.31712  | -0.42029 |
| C | 1.14535  | 6.10466  | -1.96978 |

|    |          |          |          |    |          |          |          |
|----|----------|----------|----------|----|----------|----------|----------|
| H  | 1.54098  | 5.49333  | -2.78643 | C  | 2.73637  | 0.12146  | -0.09700 |
| H  | 0.07687  | 6.25640  | -2.14828 | H  | 0.75552  | -0.39120 | -0.42210 |
| H  | 1.63471  | 7.08394  | -2.00359 | O  | 3.57877  | 0.98114  | 0.08754  |
| C  | -2.85237 | 0.51963  | 1.18604  | N  | 3.01417  | -1.23504 | -0.13475 |
| C  | -4.10781 | 0.95995  | 1.61751  | H  | 2.25811  | -1.85893 | -0.37379 |
| C  | -1.85867 | 0.27965  | 2.13801  | C  | 4.26649  | -1.85189 | 0.01062  |
| C  | -4.36874 | 1.14085  | 2.97358  | C  | 5.43432  | -1.16839 | 0.36979  |
| H  | -4.89254 | 1.17723  | 0.89678  | C  | 4.32472  | -3.23375 | -0.20822 |
| C  | -2.11765 | 0.46887  | 3.49129  | C  | 6.62906  | -1.86804 | 0.49884  |
| H  | -0.87648 | -0.04286 | 1.80798  | H  | 5.40310  | -0.10256 | 0.53888  |
| C  | -3.37380 | 0.89570  | 3.91403  | C  | 5.51759  | -3.92898 | -0.07588 |
| H  | -5.34860 | 1.48206  | 3.29095  | H  | 3.42382  | -3.77387 | -0.48775 |
| H  | -1.33312 | 0.28515  | 4.21811  | C  | 6.67020  | -3.23800 | 0.27732  |
| H  | -3.57393 | 1.04259  | 4.97020  | C  | 1.50693  | 5.37807  | -0.61080 |
| H  | 7.55455  | -1.29325 | 0.77182  | C  | 2.23713  | 5.54678  | 0.73205  |
| H  | 5.59797  | -4.96248 | -0.25785 | H  | 1.52220  | 5.57040  | 1.56021  |
| Cl | 8.21648  | -4.04901 | 0.43882  | H  | 2.93819  | 4.72766  | 0.91383  |
| O  | -1.15955 | 0.34526  | -0.52237 | H  | 2.80347  | 6.48427  | 0.73817  |
| H  | -7.52654 | -4.19281 | 0.45471  | C  | 2.53855  | 5.35620  | -1.75106 |
| H  | -3.35375 | 3.02584  | -0.02865 | H  | 3.25807  | 4.54219  | -1.62826 |
| H  | -3.14870 | 3.33447  | -1.74877 | H  | 2.04368  | 5.22701  | -2.71843 |
|    |          |          |          | H  | 3.09672  | 6.29838  | -1.77230 |
|    |          |          |          | C  | 0.58882  | 6.58633  | -0.81628 |
|    |          |          |          | H  | 0.06301  | 6.53320  | -1.77502 |
|    |          |          |          | H  | -0.15452 | 6.66851  | -0.01687 |
|    |          |          |          | H  | 1.18538  | 7.50340  | -0.81327 |
|    |          |          |          | C  | -2.86687 | 0.55673  | 1.17579  |
|    |          |          |          | C  | -4.12101 | 1.00945  | 1.59794  |
|    |          |          |          | C  | -1.87984 | 0.31557  | 2.13436  |
|    |          |          |          | C  | -4.38753 | 1.20082  | 2.95149  |
|    |          |          |          | H  | -4.90037 | 1.22832  | 0.87187  |
|    |          |          |          | C  | -2.14423 | 0.51538  | 3.48507  |
|    |          |          |          | H  | -0.89837 | -0.01609 | 1.81133  |
|    |          |          |          | C  | -3.39934 | 0.95410  | 3.89861  |
|    |          |          |          | H  | -5.36647 | 1.55114  | 3.26170  |
|    |          |          |          | H  | -1.36469 | 0.33069  | 4.21700  |
|    |          |          |          | H  | -3.60380 | 1.10906  | 4.95280  |
|    |          |          |          | H  | 7.53545  | -1.34076 | 0.77460  |
|    |          |          |          | H  | 5.55410  | -4.99878 | -0.24753 |
|    |          |          |          | Cl | 8.17982  | -4.10063 | 0.44215  |
|    |          |          |          | O  | -1.16718 | 0.35720  | -0.52295 |
|    |          |          |          | H  | -7.58640 | -4.10766 | 0.45105  |
|    |          |          |          | H  | -3.34366 | 3.06017  | -0.05982 |
|    |          |          |          | H  | -3.12311 | 3.35263  | -1.78071 |

### Conformation 4: $\Delta G$ : 4.258398694

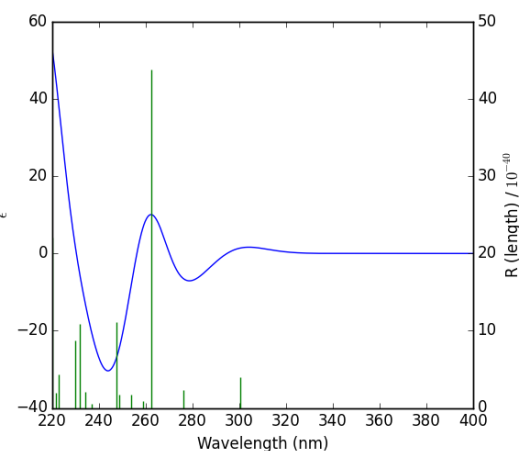

|   |          |          |          |
|---|----------|----------|----------|
| C | -0.64858 | 3.99461  | -0.76854 |
| C | -1.33501 | 2.77400  | -0.75283 |
| C | -0.60812 | 1.61351  | -0.55739 |
| C | 0.79148  | 1.63904  | -0.41266 |
| C | 1.44727  | 2.86227  | -0.43109 |
| C | 0.72975  | 4.05832  | -0.60230 |
| H | -1.22991 | 4.89818  | -0.92127 |
| H | 2.52121  | 2.87165  | -0.31002 |
| C | -2.56278 | 0.28594  | -0.29726 |
| C | -3.26142 | 1.26033  | -1.26164 |
| H | -4.34736 | 1.14563  | -1.21191 |
| H | -2.94753 | 0.97079  | -2.27001 |
| C | -2.82929 | 2.69499  | -0.95655 |
| C | -2.91815 | -1.16560 | -0.71759 |
| O | -2.19303 | -1.79575 | -1.45941 |
| N | -4.12233 | -1.60642 | -0.24729 |
| H | -4.60430 | -1.06022 | 0.45633  |
| C | -4.77802 | -2.81219 | -0.54005 |
| C | -4.27587 | -3.77486 | -1.42409 |
| C | -6.64966 | -4.04133 | -0.09720 |
| C | -5.04343 | -4.91370 | -1.62193 |
| H | -3.32823 | -3.62078 | -1.91758 |
| C | -6.25473 | -5.06307 | -0.95238 |
| H | -4.69026 | -5.68423 | -2.30007 |
| H | -6.87488 | -5.94156 | -1.08554 |
| N | -5.93571 | -2.93574 | 0.11044  |
| N | 1.39640  | 0.37844  | -0.28103 |

### Conformation 5: $\Delta G$ : 0.565442535

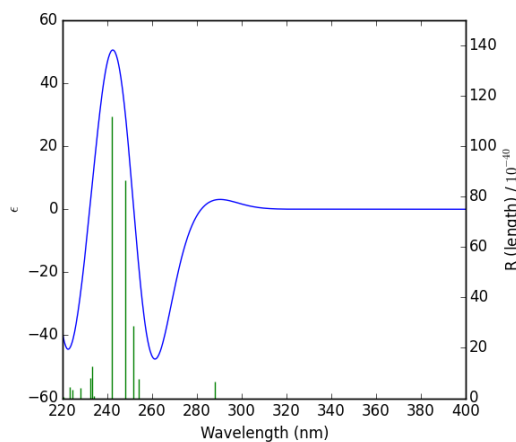

|   |         |         |          |
|---|---------|---------|----------|
| C | 3.54126 | 2.22569 | 0.28626  |
| C | 3.40751 | 0.85271 | 0.08180  |
| C | 2.34019 | 0.41141 | -0.69120 |

|    |          |          |          |
|----|----------|----------|----------|
| C  | 1.37924  | 1.30548  | -1.17509 |
| C  | 1.55001  | 2.67191  | -0.97483 |
| C  | 2.64068  | 3.15157  | -0.24435 |
| H  | 4.37728  | 2.56764  | 0.89247  |
| H  | 0.79520  | 3.33764  | -1.36612 |
| C  | 2.60281  | -1.84060 | -0.00270 |
| C  | 4.08438  | -1.57278 | 0.27204  |
| H  | 4.44635  | -2.29986 | 1.00177  |
| H  | 4.60507  | -1.75180 | -0.67432 |
| C  | 4.31402  | -0.14429 | 0.76667  |
| C  | 1.74717  | -1.66962 | 1.27770  |
| O  | 2.19363  | -1.91904 | 2.38386  |
| N  | 0.47202  | -1.28463 | 1.00069  |
| H  | 0.26220  | -1.06395 | 0.03565  |
| C  | -0.58966 | -0.98957 | 1.86434  |
| C  | -0.52303 | -1.14016 | 3.25205  |
| C  | -2.73925 | -0.21936 | 1.92815  |
| C  | -1.65627 | -0.79313 | 3.97539  |
| H  | 0.38162  | -1.50683 | 3.71660  |
| C  | -2.78717 | -0.32148 | 3.31432  |
| H  | -1.65229 | -0.89087 | 5.05649  |
| H  | -3.68375 | -0.04091 | 3.85392  |
| N  | -1.66568 | -0.54936 | 1.20896  |
| N  | 0.24358  | 0.75616  | -1.81158 |
| C  | -1.04599 | 1.18402  | -1.51758 |
| H  | 0.37247  | -0.18695 | -2.14998 |
| O  | -1.29540 | 2.25882  | -1.01550 |
| N  | -2.01230 | 0.26349  | -1.90439 |
| H  | -1.67947 | -0.67467 | -2.07574 |
| C  | -3.34005 | 0.29996  | -1.43965 |
| C  | -4.02294 | 1.49455  | -1.18841 |
| C  | -3.99638 | -0.91892 | -1.24170 |
| C  | -5.33318 | 1.45556  | -0.72268 |
| H  | -3.52283 | 2.44092  | -1.33499 |
| C  | -5.30793 | -0.95781 | -0.79001 |
| H  | -3.46606 | -1.85073 | -1.41797 |
| C  | -5.96926 | 0.23591  | -0.52498 |
| C  | 2.85235  | 4.64673  | 0.01102  |
| C  | 2.81804  | 4.91236  | 1.52542  |
| H  | 3.61057  | 4.36891  | 2.04787  |
| H  | 1.85859  | 4.60212  | 1.94966  |
| H  | 2.95559  | 5.98050  | 1.72430  |
| C  | 1.76815  | 5.50120  | -0.65306 |
| H  | 0.77239  | 5.25798  | -0.26991 |
| H  | 1.76229  | 5.36769  | -1.73938 |
| H  | 1.96012  | 6.55836  | -0.44654 |
| C  | 4.21856  | 5.07197  | -0.55122 |
| H  | 4.26781  | 4.89080  | -1.62919 |
| H  | 5.03711  | 4.52180  | -0.07836 |
| H  | 4.38390  | 6.13982  | -0.37294 |
| H  | -5.86403 | 2.37867  | -0.51818 |
| H  | -5.80948 | -1.90562 | -0.63170 |
| Cl | -7.61463 | 0.19911  | 0.05929  |
| C  | 2.39653  | -3.24449 | -0.55172 |
| C  | 2.43476  | -4.33944 | 0.31540  |
| C  | 2.22277  | -3.45547 | -1.91933 |
| C  | 2.28930  | -5.62972 | -0.18282 |
| H  | 2.57102  | -4.17467 | 1.38067  |
| C  | 2.07653  | -4.74971 | -2.41289 |
| H  | 2.21143  | -2.60690 | -2.59372 |
| C  | 2.10696  | -5.83862 | -1.54775 |
| H  | 2.31562  | -6.47390 | 0.49852  |
| H  | 1.94144  | -4.90546 | -3.47862 |
| H  | 1.99174  | -6.84573 | -1.93501 |
| H  | -3.59583 | 0.14048  | 1.36086  |
| O  | 2.12952  | -0.92333 | -0.98953 |
| H  | 5.36182  | 0.13810  | 0.62446  |
| H  | 4.11491  | -0.10392 | 1.84349  |

### Conformation 6: $\Delta G$ : 0.501605994

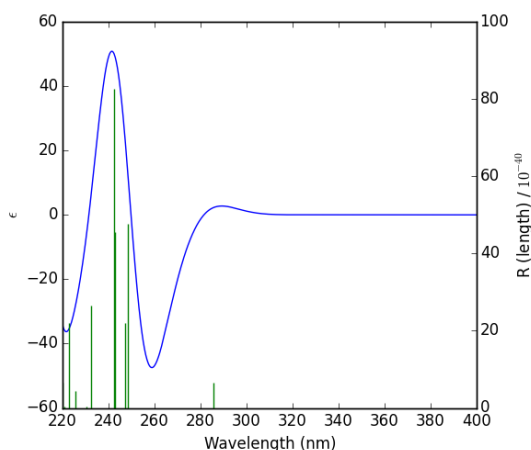

|   |          |          |          |
|---|----------|----------|----------|
| C | 3.49855  | 2.30290  | 0.30131  |
| C | 3.39943  | 0.92308  | 0.08263  |
| C | 2.34830  | 0.45754  | -0.69023 |
| C | 1.35990  | 1.32995  | -1.17208 |
| C | 1.49598  | 2.69281  | -0.96104 |
| H | 2.57379  | 3.20122  | -0.22072 |
| H | 4.32610  | 2.65447  | 0.90928  |
| H | 0.72567  | 3.34819  | -1.34519 |
| C | 2.66581  | -1.78651 | -0.00545 |
| C | 4.14144  | -1.48387 | 0.26462  |
| C | 4.52306  | -2.20201 | 0.99319  |
| H | 4.66300  | -1.65067 | -0.68344 |
| C | 4.33855  | -0.04988 | 0.75778  |
| C | 1.81039  | -1.63176 | 1.27736  |
| O | 2.26705  | -1.86172 | 2.38345  |
| N | 0.52412  | -1.28325 | 1.00228  |
| H | 0.30650  | -1.07441 | 0.03644  |
| C | -0.53914 | -0.99982 | 1.86776  |
| C | -0.46338 | -1.13504 | 3.25659  |
| C | -2.70196 | -0.26764 | 1.93419  |
| C | -1.59914 | -0.80053 | 3.98188  |
| H | 0.44988  | -1.48064 | 3.72055  |
| C | -2.74136 | -0.35575 | 3.32155  |
| H | -1.58826 | -0.88685 | 5.06391  |
| H | -3.64006 | -0.08506 | 3.86262  |
| N | -1.62611 | -0.58601 | 1.21311  |
| C | 0.23789  | 0.75180  | -1.80559 |
| N | -1.06099 | 1.15402  | -1.51663 |
| H | 0.38799  | -0.18906 | -2.14155 |
| O | -1.33427 | 2.22741  | -1.02366 |
| H | -2.00641 | 0.20966  | -1.89684 |
| N | -1.65242 | -0.72269 | -2.05739 |
| C | -3.33511 | 0.21970  | -1.43320 |
| C | -4.04541 | 1.39981  | -1.19018 |
| C | -3.96356 | -1.01270 | -1.22818 |
| C | -5.35516 | 1.33360  | -0.72584 |
| H | -3.56683 | 2.35644  | -1.34171 |
| C | -5.27453 | -1.07890 | -0.77803 |
| H | -3.41196 | -1.93319 | -1.39862 |
| C | -5.96347 | 0.10096  | -0.52143 |
| C | 2.65899  | 4.71262  | 0.00552  |
| C | 3.89475  | 5.10580  | 0.82031  |
| H | 4.82036  | 4.80660  | 0.31796  |
| H | 3.87962  | 4.65543  | 1.81785  |
| H | 3.91823  | 6.19229  | 0.94620  |
| C | 1.40501  | 5.17795  | 0.76488  |
| H | 1.34728  | 4.69477  | 1.74489  |
| H | 0.48916  | 4.93507  | 0.21894  |
| H | 1.43604  | 6.26236  | 0.91565  |
| C | 2.72852  | 5.42703  | -1.35436 |

|    |          |          |          |   |          |          |          |
|----|----------|----------|----------|---|----------|----------|----------|
| H  | 1.84737  | 5.21289  | -1.96502 | C | -2.79968 | 0.50498  | 0.04526  |
| H  | 3.61387  | 5.11044  | -1.91434 | H | -1.00693 | -0.46508 | -0.30982 |
| H  | 2.78192  | 6.51110  | -1.20859 | O | -3.42578 | 1.54299  | 0.16087  |
| H  | -5.90699 | 2.24558  | -0.52689 | N | -3.37650 | -0.75280 | 0.13806  |
| H  | -5.75473 | -2.03690 | -0.61487 | H | -2.77651 | -1.55268 | 0.00643  |
| Cl | -7.60795 | 0.03006  | 0.06137  | C | -4.72952 | -1.05794 | 0.34752  |
| C  | 2.48856  | -3.19536 | -0.55140 | C | -5.72129 | -0.09561 | 0.57410  |
| C  | 2.55045  | -4.28734 | 0.31806  | C | -5.08635 | -2.41224 | 0.32910  |
| C  | 2.31602  | -3.41287 | -1.91815 | C | -7.03761 | -0.49727 | 0.77268  |
| C  | 2.42895  | -5.58134 | -0.17686 | H | -5.45972 | 0.95165  | 0.59063  |
| H  | 2.68578  | -4.11745 | 1.38267  | C | -6.40003 | -2.80948 | 0.52933  |
| C  | 2.19372  | -4.71083 | -2.40844 | H | -4.32445 | -3.16776 | 0.15493  |
| H  | 2.28640  | -2.56615 | -2.59437 | C | -7.37447 | -1.84397 | 0.75043  |
| C  | 2.24728  | -5.79692 | -1.54087 | C | -0.24004 | 5.33486  | -0.14621 |
| H  | 2.47313  | -6.42320 | 0.50646  | C | 0.72546  | 5.92178  | 0.89680  |
| H  | 2.05904  | -4.87163 | -3.47347 | H | 1.76745  | 5.83898  | 0.57462  |
| H  | 2.15025  | -6.80699 | -1.92540 | H | 0.62502  | 5.39925  | 1.85275  |
| H  | -3.56746 | 0.07084  | 1.36737  | H | 0.50727  | 6.98286  | 1.05870  |
| O  | 2.16865  | -0.88109 | -0.99179 | C | -1.67316 | 5.55010  | 0.35050  |
| H  | 5.37715  | 0.25969  | 0.60388  | H | -1.84554 | 5.05233  | 1.30970  |
| H  | 4.15101  | -0.01394 | 1.83689  | H | -2.40937 | 5.17611  | -0.36721 |

Conformation 7:  $\Delta G$ : 5.358316171

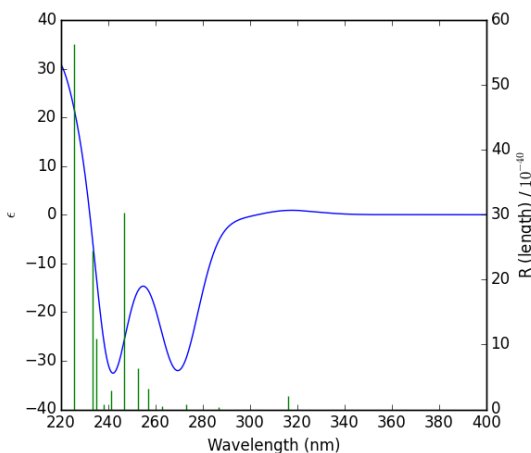

|    |          |          |          |
|----|----------|----------|----------|
| H  | -1.85335 | 6.62036  | 0.49038  |
| C  | -0.07120 | 6.08705  | -1.47674 |
| H  | -0.75518 | 5.69024  | -2.23292 |
| H  | 0.94837  | 5.99686  | -1.86284 |
| H  | -0.28746 | 7.15219  | -1.34059 |
| H  | -7.80732 | 0.24636  | 0.94635  |
| H  | -6.66724 | -3.86009 | 0.51399  |
| Cl | -9.03236 | -2.33029 | 1.00568  |
| C  | 2.19041  | -2.05886 | -1.63183 |
| C  | 2.79865  | -2.50606 | -2.80187 |
| C  | 1.46883  | -2.96412 | -0.84588 |
| C  | 2.68292  | -3.84252 | -3.18529 |
| H  | 3.35961  | -1.82109 | -3.42923 |
| C  | 1.35015  | -4.29242 | -1.23030 |
| C  | 1.01307  | -2.61197 | 0.07667  |
| C  | 1.95926  | -4.73523 | -2.40444 |
| H  | 3.15912  | -4.18096 | -4.09975 |
| H  | 0.79057  | -4.98683 | -0.61186 |
| H  | 1.87193  | -5.77419 | -2.70493 |
| O  | 0.94126  | -0.17756 | -1.00727 |
| H  | 8.04842  | -2.50494 | 1.70231  |
| H  | 3.46186  | 2.45332  | -2.17659 |
| H  | 3.76511  | 1.74615  | -0.59581 |

|   |          |          |          |
|---|----------|----------|----------|
| C | 1.35402  | 3.47617  | -0.78503 |
| C | 1.69520  | 2.14208  | -1.00023 |
| C | 0.72951  | 1.16819  | -0.78803 |
| C | -0.56312 | 1.51214  | -0.36826 |
| C | -0.87719 | 2.85332  | -0.15282 |
| C | 0.07991  | 3.85183  | -0.36083 |
| H | 2.11623  | 4.23183  | -0.96054 |
| H | -1.87777 | 3.09315  | 0.17098  |
| C | 2.28152  | -0.62075 | -1.14222 |
| C | 3.05011  | 0.33363  | -2.06416 |
| H | 4.06731  | -0.02934 | -2.23523 |
| H | 2.53047  | 0.34832  | -3.02838 |
| C | 3.07569  | 1.73194  | -1.45058 |
| C | 2.92325  | -0.62305 | 0.27364  |
| O | 2.32256  | -0.22247 | 1.24826  |
| N | 4.20586  | -1.10073 | 0.28443  |
| H | 4.56944  | -1.53020 | -0.55794 |
| C | 5.07901  | -1.23226 | 1.37545  |
| C | 4.78520  | -0.76496 | 2.66204  |
| C | 7.13091  | -2.00634 | 2.00565  |
| C | 5.75390  | -0.95369 | 3.63792  |
| H | 3.83946  | -0.28535 | 2.86743  |
| C | 6.95288  | -1.58468 | 3.31759  |
| H | 5.56792  | -0.60598 | 4.64928  |
| H | 7.72649  | -1.74540 | 4.05887  |
| N | 6.22030  | -1.83772 | 1.04714  |
| N | -1.44640 | 0.43601  | -0.18698 |

Conformation 8:  $\Delta G$ : 4.838681829

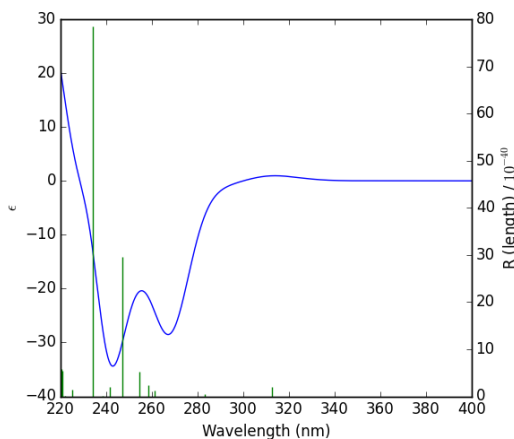

|   |          |         |          |
|---|----------|---------|----------|
| C | 1.36155  | 3.49601 | -0.78533 |
| C | 1.70785  | 2.15849 | -1.00894 |
| C | 0.74640  | 1.18147 | -0.82146 |
| C | -0.55825 | 1.51579 | -0.41509 |
| C | -0.87561 | 2.84970 | -0.19549 |

|    |          |          |          |
|----|----------|----------|----------|
| C  | 0.08336  | 3.85867  | -0.37950 |
| H  | 2.12821  | 4.24783  | -0.94206 |
| H  | -1.88107 | 3.09265  | 0.11699  |
| C  | 2.31023  | -0.59761 | -1.15814 |
| C  | 3.09038  | 0.36459  | -2.06183 |
| H  | 4.11237  | 0.00832  | -2.21777 |
| H  | 2.58744  | 0.37999  | -3.03487 |
| C  | 3.09694  | 1.76063  | -1.44320 |
| C  | 2.92116  | -0.60605 | 0.27143  |
| O  | 2.28930  | -0.23783 | 1.23915  |
| N  | 4.21318  | -1.05639 | 0.30344  |
| H  | 4.60628  | -1.45928 | -0.53873 |
| C  | 5.06260  | -1.19431 | 1.41227  |
| C  | 4.72715  | -0.76555 | 2.70211  |
| C  | 7.11576  | -1.93790 | 2.07402  |
| C  | 5.67581  | -0.95748 | 3.69693  |
| H  | 3.76624  | -0.31145 | 2.89493  |
| C  | 6.89628  | -1.55351 | 3.39105  |
| H  | 5.45727  | -0.64014 | 4.71175  |
| H  | 7.65538  | -1.71543 | 4.14695  |
| N  | 6.22500  | -1.76584 | 1.09769  |
| N  | -1.43665 | 0.43247  | -0.25920 |
| C  | -2.78602 | 0.49207  | -0.00285 |
| H  | -0.99326 | -0.46440 | -0.39776 |
| O  | -3.41169 | 1.52605  | 0.14693  |
| N  | -3.35910 | -0.76853 | 0.06775  |
| H  | -2.75539 | -1.56455 | -0.07012 |
| C  | -4.70496 | -1.08262 | 0.30788  |
| C  | -5.70588 | -0.12518 | 0.51403  |
| C  | -5.04582 | -2.44087 | 0.33597  |
| C  | -7.01475 | -0.53576 | 0.74169  |
| H  | -5.45655 | 0.92498  | 0.49531  |
| C  | -6.35237 | -2.84687 | 0.56334  |
| H  | -4.27690 | -3.19276 | 0.17768  |
| C  | -7.33566 | -1.88630 | 0.76639  |
| C  | -0.32771 | 5.31143  | -0.12434 |
| C  | -1.49342 | 5.68390  | -1.05568 |
| H  | -2.36200 | 5.04084  | -0.88933 |
| H  | -1.19662 | 5.58574  | -2.10448 |
| H  | -1.80108 | 6.72037  | -0.87965 |
| C  | 0.82415  | 6.28846  | -0.37853 |
| H  | 1.16977  | 6.24116  | -1.41620 |
| H  | 1.67501  | 6.08723  | 0.28024  |
| H  | 0.48606  | 7.31099  | -0.18510 |
| C  | -0.77658 | 5.46292  | 1.33868  |
| H  | 0.03697  | 5.19780  | 2.02082  |
| H  | -1.63098 | 4.81958  | 1.56575  |
| H  | -1.07092 | 6.49905  | 1.53783  |
| H  | -7.79116 | 0.20417  | 0.90071  |
| H  | -6.60708 | -3.90050 | 0.58360  |
| Cl | -8.98418 | -2.38345 | 1.05723  |
| C  | 2.23708  | -2.03447 | -1.65477 |
| C  | 2.87097  | -2.47301 | -2.81438 |
| C  | 1.50510  | -2.94712 | -0.88720 |
| C  | 2.77055  | -3.80831 | -3.20582 |
| H  | 3.44030  | -1.78226 | -3.42763 |
| C  | 1.40177  | -4.27439 | -1.27979 |
| H  | 1.02907  | -2.60156 | 0.02758  |
| C  | 2.03656  | -4.70857 | -2.44344 |
| H  | 3.26724  | -4.13980 | -4.11189 |
| H  | 0.83405  | -4.97471 | -0.67559 |
| H  | 1.96127  | -5.74668 | -2.75006 |
| O  | 0.96520  | -0.16167 | -1.04832 |
| H  | 8.05170  | -2.40773 | 1.78119  |
| H  | 3.48590  | 2.48726  | -2.16249 |
| H  | 3.77628  | 1.77811  | -0.58049 |

Conformation 9:  $\Delta G$ : 5.382676089

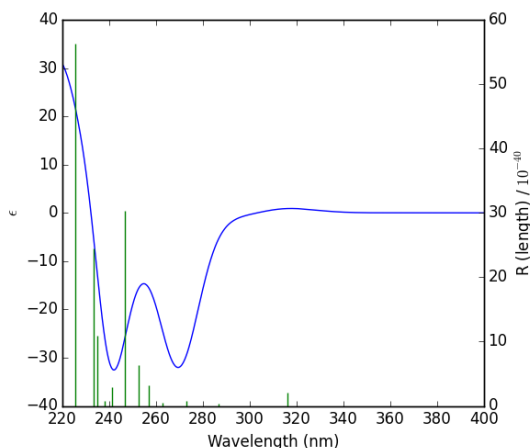

|   |          |          |          |
|---|----------|----------|----------|
| C | 1.35402  | 3.47617  | -0.78502 |
| C | 1.69520  | 2.14208  | -1.00024 |
| C | 0.72951  | 1.16819  | -0.78803 |
| C | -0.56312 | 1.51214  | -0.36826 |
| C | -0.87719 | 2.85332  | -0.15282 |
| C | 0.07990  | 3.85183  | -0.36082 |
| H | 2.11623  | 4.23183  | -0.96053 |
| H | -1.87777 | 3.09315  | 0.17098  |
| C | 2.28152  | -0.62074 | -1.14223 |
| C | 3.05012  | 0.33364  | -2.06416 |
| C | 4.06731  | -0.02933 | -2.23524 |
| H | 2.53047  | 0.34833  | -3.02839 |
| C | 3.07569  | 1.73195  | -1.45059 |
| C | 2.92325  | -0.62305 | 0.27364  |
| O | 2.32255  | -0.22247 | 1.24826  |
| N | 4.20587  | -1.10071 | 0.28443  |
| H | 4.56945  | -1.53018 | -0.55795 |
| C | 5.07901  | -1.23225 | 1.37546  |
| C | 4.78519  | -0.76496 | 2.66205  |
| C | 7.13090  | -2.00636 | 2.00566  |
| C | 5.75389  | -0.95370 | 3.63793  |
| H | 3.83945  | -0.28534 | 2.86743  |
| C | 6.95286  | -1.58471 | 3.31760  |
| H | 5.56791  | -0.60600 | 4.64928  |
| H | 7.72647  | -1.74543 | 4.05889  |
| N | 6.22029  | -1.83772 | 1.04714  |
| C | -1.44639 | 0.43601  | -0.18698 |
| N | -2.79968 | 0.50497  | 0.04526  |
| H | -1.00692 | -0.46508 | -0.30982 |
| O | -3.42578 | 1.54299  | 0.16087  |
| N | -3.37650 | -0.75281 | 0.13806  |
| H | -2.77650 | -1.55268 | 0.00642  |
| C | -4.72952 | -1.05795 | 0.34752  |
| C | -5.72129 | -0.09561 | 0.57410  |
| C | -5.08635 | -2.41224 | 0.32910  |
| C | -7.03761 | -0.49728 | 0.77268  |
| H | -5.45972 | 0.95164  | 0.59062  |
| C | -6.40002 | -2.80949 | 0.52933  |
| H | -4.32445 | -3.16777 | 0.15493  |
| C | -7.37446 | -1.84398 | 0.75043  |
| C | -0.24005 | 5.33486  | -0.14621 |
| C | 0.72545  | 5.92179  | 0.89680  |
| H | 1.76744  | 5.83899  | 0.57462  |
| H | 0.62502  | 5.39925  | 1.85276  |
| H | 0.50726  | 6.98286  | 1.05871  |
| C | -1.67317 | 5.55010  | 0.35051  |
| H | -1.84554 | 5.05233  | 1.30971  |
| H | -2.40938 | 5.17611  | -0.36720 |
| H | -1.85336 | 6.62035  | 0.49039  |
| C | -0.07121 | 6.08705  | -1.47673 |



|    |          |          |          |    |          |          |          |
|----|----------|----------|----------|----|----------|----------|----------|
| H  | -0.75519 | 5.69024  | -2.23291 | C  | -2.78464 | 0.49270  | 0.00939  |
| H  | 0.94836  | 5.99687  | -1.86283 | H  | -0.99131 | -0.46572 | -0.37901 |
| H  | -0.28747 | 7.15219  | -1.34058 | O  | -3.41031 | 1.52744  | 0.15378  |
| H  | -7.80731 | 0.24635  | 0.94635  | N  | -3.35722 | -0.76754 | 0.08894  |
| H  | -6.66723 | -3.86009 | 0.51398  | H  | -2.75629 | -1.56374 | -0.05967 |
| Cl | -9.03235 | -2.33030 | 1.00567  | C  | -4.70491 | -1.08015 | 0.32056  |
| C  | 2.19042  | -2.05885 | -1.63184 | C  | -5.70173 | -0.12262 | 0.54547  |
| C  | 2.79866  | -2.50606 | -2.80187 | C  | -5.05142 | -2.43735 | 0.32319  |
| C  | 1.46883  | -2.96412 | -0.84589 | C  | -7.01254 | -0.53190 | 0.76409  |
| C  | 2.68294  | -3.84251 | -3.18529 | H  | -5.44816 | 0.92671  | 0.54637  |
| H  | 3.35962  | -1.82108 | -3.42923 | C  | -6.35973 | -2.84204 | 0.54247  |
| C  | 1.35016  | -4.29241 | -1.23031 | H  | -4.28545 | -3.18934 | 0.15155  |
| H  | 1.01307  | -2.61197 | 0.07666  | C  | -7.33920 | -1.88133 | 0.76257  |
| C  | 1.95927  | -4.73522 | -2.40444 | C  | -0.32478 | 5.31091  | -0.13153 |
| H  | 3.15913  | -4.18095 | -4.09975 | C  | -0.76511 | 5.46636  | 1.33370  |
| H  | 0.79058  | -0.61186 | -0.61186 | H  | 0.05212  | 5.20215  | 2.01176  |
| H  | 1.87195  | -5.77418 | -2.70493 | H  | -1.61875 | 4.82427  | 1.56710  |
| O  | 0.94126  | -0.17755 | -1.00727 | H  | -1.05746 | 6.50320  | 1.53211  |
| H  | 8.04840  | -2.50496 | 1.70232  | C  | -1.49586 | 5.68119  | -1.05700 |
| H  | 3.46185  | 2.45333  | -2.17660 | H  | -2.36381 | 5.03918  | -0.88352 |
| H  | 3.76511  | 1.74616  | -0.59582 | H  | -1.20548 | 5.57979  | -2.10729 |
|    |          |          |          | H  | -1.80187 | 6.71834  | -0.88215 |
|    |          |          |          | C  | 0.82572  | 6.28702  | -0.39511 |
|    |          |          |          | H  | 1.16575  | 6.23626  | -1.43448 |
|    |          |          |          | H  | 1.68015  | 6.08794  | 0.25967  |
|    |          |          |          | H  | 0.48877  | 7.31022  | -0.20321 |
|    |          |          |          | H  | -7.78607 | 0.20809  | 0.93634  |
|    |          |          |          | H  | -6.61882 | -3.89481 | 0.54333  |
|    |          |          |          | Cl | -8.99014 | -2.37685 | 1.04246  |
|    |          |          |          | C  | 2.23258  | -2.04048 | -1.64854 |
|    |          |          |          | C  | 2.86239  | -2.48352 | -2.80867 |
|    |          |          |          | C  | 1.50304  | -2.95011 | -0.87510 |
|    |          |          |          | C  | 2.76038  | -3.82029 | -3.19471 |
|    |          |          |          | H  | 3.42975  | -1.79515 | -3.42645 |
|    |          |          |          | C  | 1.39814  | -4.27884 | -1.26226 |
|    |          |          |          | H  | 1.03028  | -2.60115 | 0.04007  |
|    |          |          |          | C  | 2.02891  | -4.71755 | -2.42639 |
|    |          |          |          | H  | 3.25376  | -4.15532 | -4.10128 |
|    |          |          |          | H  | 0.83234  | -4.97671 | -0.65343 |
|    |          |          |          | H  | 1.95243  | -5.75681 | -2.72883 |
|    |          |          |          | O  | 0.96291  | -0.16520 | -1.04551 |
|    |          |          |          | H  | 8.05710  | -2.40394 | 1.77043  |
|    |          |          |          | H  | 3.48053  | 2.47939  | -2.17652 |
|    |          |          |          | H  | 3.77644  | 1.77587  | -0.59304 |

### Conformation 10: $\Delta G$ : 4.456616395

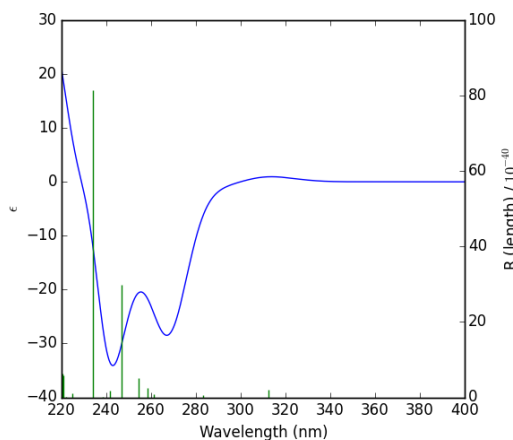

|   |          |          |          |
|---|----------|----------|----------|
| C | 1.36126  | 3.49309  | -0.79432 |
| C | 1.70636  | 2.15486  | -1.01543 |
| C | 0.74533  | 1.17865  | -0.82159 |
| C | -0.55759 | 1.51454  | -0.41122 |
| C | -0.87383 | 2.84917  | -0.19429 |
| C | 0.08464  | 3.85734  | -0.38482 |
| H | 2.12756  | 4.24427  | -0.95583 |
| H | -1.87806 | 3.09320  | 0.12125  |
| C | 2.30754  | -0.60181 | -1.15740 |
| C | 3.08517  | 0.35701  | -2.06695 |
| H | 4.10665  | 0.00008  | -2.22471 |
| H | 2.57924  | 0.36899  | -3.03846 |
| C | 3.09390  | 1.75534  | -1.45327 |
| C | 2.92256  | -0.60564 | 0.27037  |
| O | 2.29305  | -0.23583 | 1.23901  |
| N | 4.21513  | -1.05469 | 0.29977  |
| H | 4.60567  | -1.46012 | -0.54238 |
| C | 5.06746  | -1.19034 | 1.40663  |
| C | 4.73558  | -0.75849 | 2.69637  |
| C | 7.12211  | -1.93309 | 2.06466  |
| C | 5.68683  | -0.94842 | 3.68913  |
| H | 3.77519  | -0.30391 | 2.89078  |
| C | 6.90630  | -1.54551 | 3.38136  |
| H | 5.47103  | -0.62864 | 4.70376  |
| H | 7.66737  | -1.70594 | 4.13558  |
| N | 6.22881  | -1.76303 | 1.09031  |
| N | -1.43566 | 0.43192  | -0.24872 |

### Conformation 11: $\Delta G$ : 0.101499661

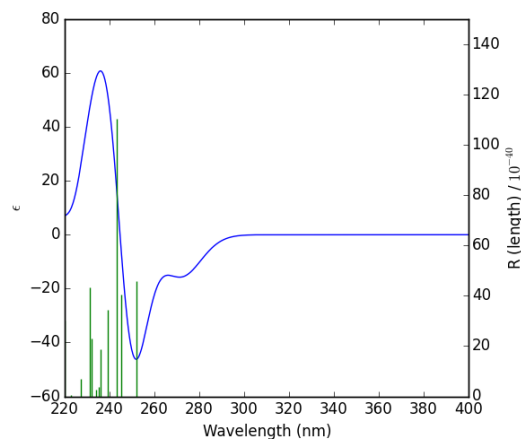

|   |          |          |          |
|---|----------|----------|----------|
| C | -4.43393 | -0.34354 | 0.28655  |
| C | -3.38318 | 0.51175  | -0.03676 |
| C | -2.20049 | -0.03859 | -0.53413 |
| C | -2.08872 | -1.42496 | -0.69000 |
| C | -3.15492 | -2.25116 | -0.35053 |

|    |          |          |          |
|----|----------|----------|----------|
| C  | -4.35336 | -1.72999 | 0.13994  |
| H  | -5.35228 | 0.10683  | 0.65707  |
| H  | -3.02160 | -3.32119 | -0.47236 |
| C  | -1.14831 | 2.11702  | -0.76846 |
| C  | -2.56311 | 2.67596  | -0.92816 |
| H  | -2.52356 | 3.75478  | -0.77364 |
| H  | -2.88324 | 2.47978  | -1.95690 |
| C  | -3.50474 | 2.01085  | 0.07081  |
| C  | -0.59809 | 2.49864  | 0.62976  |
| O  | -0.89840 | 3.57729  | 1.12124  |
| N  | 0.25472  | 1.59281  | 1.16810  |
| H  | 0.38181  | 0.69706  | 0.69365  |
| C  | 1.01192  | 1.73111  | 2.33988  |
| C  | 0.84168  | 2.78156  | 3.25187  |
| C  | 2.67868  | 0.79280  | 3.59262  |
| C  | 1.65891  | 2.79454  | 4.37260  |
| H  | 0.09906  | 3.54385  | 3.07001  |
| C  | 2.59932  | 1.78600  | 4.56088  |
| H  | 1.55471  | 3.59281  | 5.10088  |
| H  | 3.24942  | 1.76698  | 5.42752  |
| N  | 1.91278  | 0.75873  | 2.50300  |
| N  | -0.90254 | -1.96812 | -1.24349 |
| C  | 0.31265  | -1.78574 | -0.60424 |
| H  | -1.01553 | -2.78068 | -1.83187 |
| O  | 0.41517  | -1.17850 | 0.44655  |
| N  | 1.37284  | -2.33907 | -1.28142 |
| H  | 1.18851  | -2.72248 | -2.19627 |
| C  | 2.72709  | -2.32686 | -0.89129 |
| C  | 3.21698  | -1.59123 | 0.19469  |
| C  | 3.61077  | -3.08601 | -1.66565 |
| C  | 4.57773  | -1.63136 | 0.48209  |
| H  | 2.55837  | -0.98836 | 0.80812  |
| C  | 4.96730  | -3.11781 | -1.37671 |
| H  | 3.23311  | -3.66309 | -2.50603 |
| C  | 5.44486  | -2.38671 | -0.29636 |
| C  | -5.54769 | -2.61008 | 0.51767  |
| C  | -5.88358 | -2.40238 | 2.00375  |
| H  | -6.14178 | -1.36099 | 2.21540  |
| H  | -5.03143 | -2.67272 | 2.63422  |
| H  | -6.73777 | -3.02544 | 2.28922  |
| C  | -5.25905 | -4.09750 | 0.29269  |
| H  | -4.41551 | -4.43949 | 0.90079  |
| H  | -5.03956 | -4.31064 | -0.75857 |
| H  | -6.13551 | -4.68768 | 0.57570  |
| C  | -6.76252 | -2.21778 | -0.33987 |
| H  | -6.54821 | -2.35948 | -1.40352 |
| H  | -7.03983 | -1.17095 | -0.18774 |
| H  | -7.62722 | -2.83601 | -0.07647 |
| H  | 4.96502  | -1.05638 | 1.31622  |
| H  | 5.64718  | -3.70677 | -1.98159 |
| Cl | 7.14994  | -2.41660 | 0.07808  |
| C  | -0.20504 | 2.69855  | -1.81800 |
| C  | 0.32920  | 1.89728  | -2.82626 |
| C  | 0.10293  | 4.06171  | -1.78529 |
| C  | 1.15830  | 2.45732  | -3.79549 |
| H  | 0.09442  | 0.83945  | -2.84701 |
| C  | 0.93088  | 4.61457  | -2.75579 |
| H  | -0.29423 | 4.68004  | -0.98552 |
| C  | 1.46008  | 3.81450  | -3.76551 |
| H  | 1.57129  | 1.82586  | -4.57594 |
| H  | 1.16648  | 5.67340  | -2.71977 |
| H  | 2.10852  | 4.24661  | -4.52092 |
| O  | -1.12704 | 0.70283  | -0.93599 |
| H  | 3.39399  | -0.02105 | 3.69181  |
| H  | -4.53967 | 2.31099  | -0.11809 |
| H  | -3.25156 | 2.34902  | 1.08266  |

Conformation 12:  $\Delta G: 0.0$

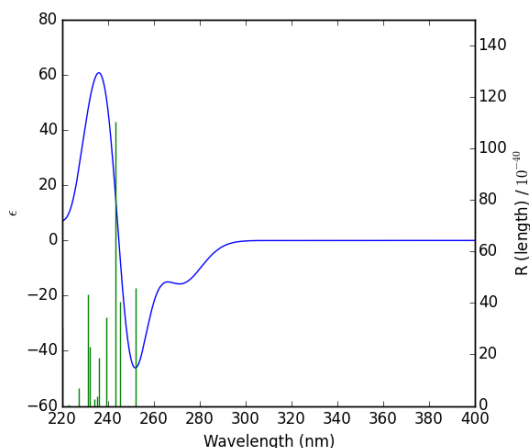

|   |          |          |          |
|---|----------|----------|----------|
| C | -4.44709 | -0.30116 | 0.30332  |
| C | -3.38493 | 0.54632  | -0.02822 |
| C | -2.21086 | -0.01027 | -0.52614 |
| C | -2.10710 | -1.40204 | -0.68103 |
| C | -3.17635 | -2.21353 | -0.33821 |
| C | -4.37484 | -1.68305 | 0.15717  |
| H | -5.35518 | 0.16287  | 0.67534  |
| H | -3.05982 | -3.28816 | -0.45687 |
| C | -1.14289 | 2.13493  | -0.76750 |
| C | -2.55397 | 2.70351  | -0.92689 |
| H | -2.50665 | 3.78233  | -0.77445 |
| H | -2.87601 | 2.50770  | -1.95509 |
| C | -3.49986 | 2.04644  | 0.07342  |
| C | -0.58960 | 2.51401  | 0.63014  |
| O | -0.88249 | 3.59493  | 1.12089  |
| N | 0.25790  | 1.60321  | 1.16882  |
| H | 0.37947  | 0.70659  | 0.69485  |
| C | 1.01655  | 1.73788  | 2.34002  |
| C | 0.85155  | 2.78919  | 3.25202  |
| C | 2.67955  | 0.79219  | 3.59214  |
| C | 1.66940  | 2.79871  | 4.37228  |
| H | 0.11226  | 3.55476  | 3.07055  |
| C | 2.60533  | 1.78593  | 4.56021  |
| H | 1.56915  | 3.59759  | 5.10046  |
| H | 3.25589  | 1.76412  | 5.42644  |
| N | 1.91293  | 0.76134  | 2.50285  |
| N | -0.92621 | -1.95079 | -1.24002 |
| C | 0.29136  | -1.77536 | -0.60220 |
| H | -1.04584 | -2.76547 | -1.82415 |
| O | 0.39776  | -1.17188 | 0.45031  |
| N | 1.34748  | -2.33096 | -1.28326 |
| H | 1.15964  | -2.70880 | -2.19974 |
| C | 2.70210  | -2.32980 | -0.89388 |
| C | 3.19786  | -1.60068 | 0.19378  |
| C | 3.57960  | -3.09351 | -1.67074 |
| C | 4.55831  | -1.65218 | 0.48070  |
| H | 2.54423  | -0.99412 | 0.80887  |
| C | 4.93595  | -3.13645 | -1.38243 |
| H | 3.19708  | -3.66532 | -2.51253 |
| C | 5.41933  | -2.41213 | -0.30010 |
| C | -5.52445 | -2.62703 | 0.51730  |
| C | -6.75237 | -1.86638 | 1.02628  |
| H | -7.13970 | -1.17511 | 0.27115  |
| H | -6.52451 | -1.29755 | 1.93299  |
| H | -7.54798 | -2.57726 | 1.26830  |
| C | -5.06251 | -3.59322 | 1.62090  |
| H | -4.76138 | -3.04138 | 2.51613  |
| H | -4.21068 | -4.19860 | 1.29748  |

|    |          |          |          |   |
|----|----------|----------|----------|---|
| H  | -5.87620 | -4.27455 | 1.89122  | N |
| C  | -5.93576 | -3.43251 | -0.72633 | C |
| H  | -5.10660 | -4.03522 | -1.10836 | H |
| H  | -6.26721 | -2.76583 | -1.52813 | O |
| H  | -6.75802 | -4.11275 | -0.48074 | N |
| H  | 4.95043  | -1.08251 | 1.31624  | H |
| H  | 5.61113  | -3.72885 | -1.98918 | C |
| Cl | 7.12422  | -2.45601 | 0.07382  | C |
| C  | -0.19584 | 2.70845  | -1.81790 | C |
| C  | 0.33331  | 1.90203  | -2.82478 | C |
| C  | 0.12140  | 4.06954  | -1.78723 | H |
| C  | 1.16654  | 2.45491  | -3.79459 | C |
| H  | 0.09128  | 0.84577  | -2.84398 | H |
| C  | 0.95340  | 4.61525  | -2.75827 | C |
| H  | -0.27177 | 4.69179  | -0.98855 | C |
| C  | 1.47755  | 3.81004  | -3.76656 | C |
| H  | 1.57548  | 1.81943  | -4.57391 | H |
| H  | 1.19620  | 5.67251  | -2.72384 | H |
| H  | 2.12928  | 4.23655  | -4.52231 | H |
| O  | -1.13204 | 0.72050  | -0.93343 | C |
| H  | 3.39111  | -0.02496 | 3.69116  | H |
| H  | -4.53309 | 2.35020  | -0.11941 | H |
| H  | -3.24811 | 2.38824  | 1.08439  | H |

Conformation 13:  $\Delta G$ : 4.702731895

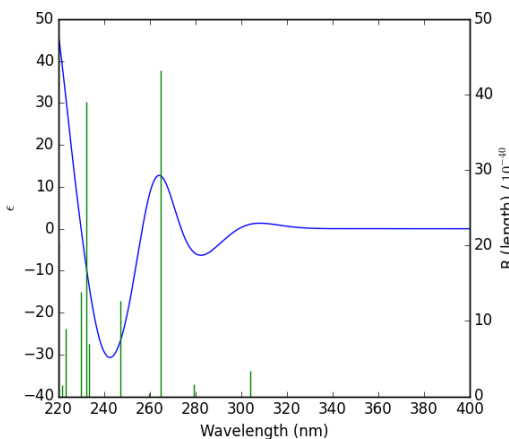

|    |          |          |          |
|----|----------|----------|----------|
| H  | 1.40561  | 0.38713  | -0.28737 |
| C  | 2.74680  | 0.13980  | -0.09969 |
| H  | 0.77217  | -0.38768 | -0.43340 |
| H  | 3.58230  | 1.00402  | 0.09445  |
| H  | 3.03518  | -1.21448 | -0.14633 |
| H  | 2.28465  | -1.84252 | -0.39175 |
| H  | 4.29106  | -1.82323 | 0.00130  |
| C  | 5.45413  | -1.13257 | 0.36244  |
| C  | 4.35846  | -3.20459 | -0.21825 |
| C  | 6.65302  | -1.82482 | 0.49306  |
| C  | 5.41589  | -0.06703 | 0.53195  |
| C  | 5.55549  | -3.89236 | -0.08460 |
| H  | 3.46137  | -3.75029 | -0.49923 |
| C  | 6.70318  | -3.19438 | 0.27091  |
| H  | 1.40102  | 5.42857  | -0.61265 |
| C  | 0.82462  | 6.30717  | 0.50990  |
| H  | -0.25118 | 6.46278  | 0.38776  |
| H  | 0.99019  | 5.84396  | 1.48716  |
| H  | 1.30873  | 7.28971  | 0.50724  |
| C  | 2.91488  | 5.31763  | -0.40678 |
| H  | 3.15715  | 4.85343  | 0.55405  |
| H  | 3.38841  | 4.73118  | -1.19993 |
| H  | 3.35897  | 6.31771  | -0.41925 |
| C  | 1.14496  | 6.10423  | -1.97009 |
| H  | 1.54134  | 5.49287  | -2.78637 |
| H  | 0.07655  | 6.25561  | -2.14933 |
| H  | 1.63403  | 7.08365  | -2.00376 |
| C  | -2.85278 | 0.51994  | 1.18532  |
| C  | -4.10833 | 0.96076  | 1.61583  |
| C  | -1.85958 | 0.28042  | 2.13796  |
| C  | -4.36996 | 1.14258  | 2.97167  |
| H  | -4.89264 | 1.17790  | 0.89458  |
| C  | -2.11924 | 0.47056  | 3.49096  |
| H  | -0.87729 | -0.04244 | 1.80859  |
| C  | -3.37556 | 0.89785  | 3.91277  |
| H  | -5.34994 | 1.48414  | 3.28829  |
| H  | -1.33514 | 0.28722  | 4.21833  |
| H  | -3.57619 | 1.04542  | 4.96876  |
| Cl | 8.21772  | -4.04777 | 0.43826  |
| H  | 7.55563  | -1.29195 | 0.77047  |
| H  | 5.59898  | -4.96182 | -0.25676 |
| O  | -1.15919 | 0.34452  | -0.52227 |
| H  | -7.52895 | -4.19078 | 0.45178  |
| H  | -3.35459 | 3.02522  | -0.03204 |
| H  | -3.14794 | 3.33206  | -1.75227 |

|   |          |          |          |
|---|----------|----------|----------|
| C | -0.67008 | 3.98210  | -0.75258 |
| C | -1.34802 | 2.76332  | -0.73898 |
| C | -0.60811 | 1.60485  | -0.55005 |
| C | 0.78708  | 1.64242  | -0.41084 |
| C | 1.43955  | 2.87372  | -0.42701 |
| C | 0.71313  | 4.05910  | -0.59056 |
| H | -1.25244 | 4.88865  | -0.90051 |
| H | 2.51175  | 2.88235  | -0.30884 |
| C | -2.55296 | 0.26084  | -0.29059 |
| C | -3.26390 | 1.23481  | -1.24618 |
| H | -4.34864 | 1.11103  | -1.19220 |
| H | -2.95233 | 0.95362  | -2.25762 |
| C | -2.84284 | 2.67145  | -0.93471 |
| C | -2.89783 | -1.19106 | -0.71883 |
| O | -2.17123 | -1.80879 | -1.46949 |
| N | -4.09508 | -1.64679 | -0.24484 |
| H | -4.57836 | -1.11044 | 0.46545  |
| C | -4.73968 | -2.85733 | -0.54289 |
| C | -4.23145 | -3.80805 | -1.43643 |
| C | -6.59552 | -4.11024 | -0.10022 |
| C | -4.98727 | -4.95383 | -1.63885 |
| H | -3.28814 | -3.64017 | -1.93358 |
| C | -6.19355 | -5.12141 | -0.96462 |
| H | -4.62880 | -5.71538 | -2.32430 |
| H | -6.80456 | -6.00577 | -1.10126 |
| N | -5.89274 | -2.99833 | 0.11222  |

Conformation 14:  $\Delta G$ : 4.267190102

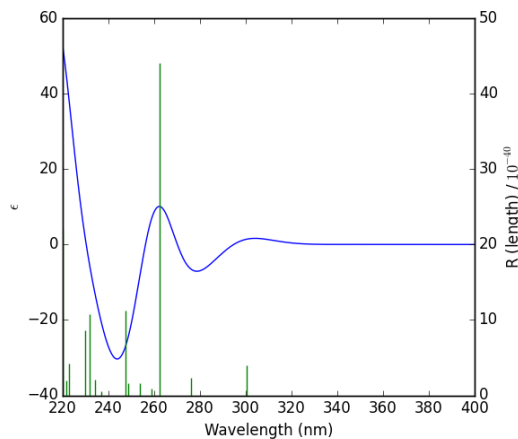

|   |          |         |          |
|---|----------|---------|----------|
| C | -0.64890 | 3.99432 | -0.76907 |
| C | -1.33514 | 2.77363 | -0.75332 |

|    |          |          |          |
|----|----------|----------|----------|
| C  | -0.60813 | 1.61329  | -0.55737 |
| C  | 0.79140  | 1.63906  | -0.41213 |
| C  | 1.44702  | 2.86239  | -0.43058 |
| C  | 0.72938  | 4.05828  | -0.60233 |
| H  | -1.23026 | 4.89780  | -0.92223 |
| H  | 2.52091  | 2.87195  | -0.30908 |
| C  | -2.56263 | 0.28553  | -0.29739 |
| C  | -3.26118 | 1.25944  | -1.26226 |
| H  | -4.34712 | 1.14467  | -1.21273 |
| H  | -2.94710 | 0.96964  | -2.27050 |
| C  | -2.82933 | 2.69430  | -0.95762 |
| C  | -2.91756 | -1.16637 | -0.71691 |
| O  | -2.19167 | -1.79725 | -1.45733 |
| N  | -4.12230 | -1.60668 | -0.24754 |
| H  | -4.60501 | -1.05979 | 0.45502  |
| C  | -4.77785 | -2.81257 | -0.54005 |
| C  | -4.27500 | -3.77589 | -1.42298 |
| C  | -6.65006 | -4.04119 | -0.09811 |
| C  | -5.04254 | -4.91475 | -1.62080 |
| H  | -3.32688 | -3.62228 | -1.91570 |
| C  | -6.25447 | -5.06353 | -0.95227 |
| H  | -4.68886 | -5.68575 | -2.29814 |
| H  | -6.87461 | -5.94203 | -1.08544 |
| N  | -5.93616 | -2.93555 | 0.10946  |
| N  | 1.39639  | 0.37855  | -0.27979 |
| C  | 2.73652  | 0.12172  | -0.09671 |
| H  | 0.75563  | -0.39118 | -0.42102 |
| O  | 3.57897  | 0.98150  | 0.08719  |
| N  | 3.01442  | -1.23476 | -0.13445 |
| H  | 2.25825  | -1.85877 | -0.37284 |
| C  | 4.26679  | -1.85154 | 0.01078  |
| C  | 5.43470  | -1.16792 | 0.36947  |
| C  | 4.32499  | -3.23345 | -0.20770 |
| C  | 6.62948  | -1.86752 | 0.49843  |
| H  | 5.40352  | -0.10204 | 0.53825  |
| C  | 5.51790  | -3.92863 | -0.07546 |
| H  | 3.42404  | -3.77367 | -0.48688 |
| C  | 6.67059  | -3.23754 | 0.27728  |
| C  | 1.50633  | 5.37816  | -0.61087 |
| C  | 2.23596  | 5.54734  | 0.73223  |
| H  | 1.52070  | 5.57095  | 1.56011  |
| H  | 2.93715  | 4.72842  | 0.91445  |
| H  | 2.80209  | 6.48496  | 0.73838  |
| C  | 2.53838  | 5.35618  | -1.75073 |
| H  | 3.25796  | 4.54229  | -1.62747 |
| H  | 2.04388  | 5.22670  | -2.71825 |
| H  | 3.09643  | 6.29843  | -1.77198 |
| C  | 0.58809  | 6.58622  | -0.81699 |
| H  | 0.06262  | 6.53275  | -1.77589 |
| H  | -0.15552 | 6.66853  | -0.01785 |
| H  | 1.18452  | 7.50339  | -0.81404 |
| C  | -2.86711 | 0.55684  | 1.17552  |
| C  | -4.12129 | 1.00982  | 1.59720  |
| C  | -1.88033 | 0.31583  | 2.13442  |
| C  | -4.38813 | 1.20161  | 2.95065  |
| H  | -4.90042 | 1.22863  | 0.87086  |
| C  | -2.14505 | 0.51602  | 3.48498  |
| H  | -0.89883 | -0.01602 | 1.81168  |
| C  | -3.40023 | 0.95502  | 3.89808  |
| H  | -5.36711 | 1.55215  | 3.26051  |
| H  | -1.36575 | 0.33142  | 4.21718  |
| H  | -3.60494 | 1.11031  | 4.95216  |
| Cl | 8.18026  | -4.10011 | 0.44199  |
| H  | 7.53592  | -1.34016 | 0.77384  |
| H  | 5.55439  | -4.99848 | -0.24683 |
| O  | -1.16702 | 0.35692  | -0.52278 |
| H  | -7.58730 | -4.10706 | 0.44933  |
| H  | -3.34416 | 3.05988  | -0.06132 |
| H  | -3.12285 | 3.35147  | -1.78227 |

Conformation 15:  $\Delta G$ : 4.769003174

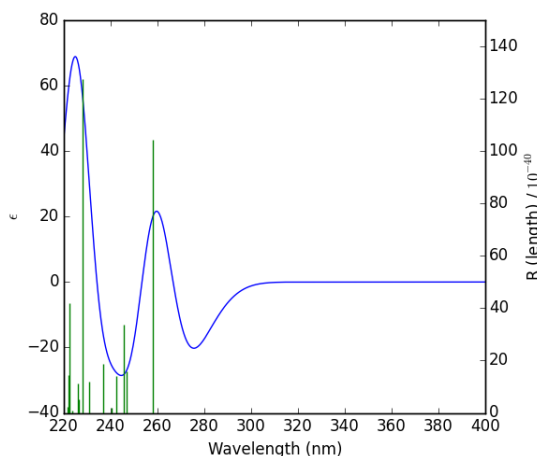

|   |          |          |          |
|---|----------|----------|----------|
| C | -4.35680 | -0.55539 | 0.01425  |
| C | -3.36737 | 0.36991  | -0.30759 |
| C | -2.11494 | -0.10311 | -0.70913 |
| C | -1.88820 | -1.48143 | -0.79271 |
| C | -2.89861 | -2.37824 | -0.46079 |
| C | -4.15648 | -1.93629 | -0.04918 |
| H | -5.32656 | -0.16602 | 0.31666  |
| H | -2.67270 | -3.43735 | -0.52712 |
| C | -1.21395 | 2.11559  | -0.88337 |
| C | -2.63791 | 2.57190  | -1.20653 |
| H | -2.69347 | 3.65229  | -1.06875 |
| H | -2.83034 | 2.34090  | -2.25966 |
| C | -3.63069 | 1.85587  | -0.29548 |
| C | -0.87813 | 2.50288  | 0.58417  |
| O | -1.30846 | 3.54386  | 1.03863  |
| N | -0.07030 | 1.60503  | 1.21692  |
| H | 0.09892  | 0.72123  | 0.73985  |
| C | 0.49267  | 1.72701  | 2.49605  |
| C | 0.93272  | 0.55117  | 3.12666  |
| C | 1.16958  | 3.01818  | 4.23998  |
| C | 1.52257  | 0.66624  | 4.37368  |
| H | 0.80215  | -0.40708 | 2.63572  |
| C | 1.64446  | 1.92723  | 4.95613  |
| H | 1.87590  | -0.22049 | 4.89108  |
| H | 2.09468  | 2.06169  | 5.93276  |
| N | 0.61171  | 2.93666  | 3.03019  |
| N | -0.64657 | -1.96122 | -1.28685 |
| C | 0.54441  | -1.70699 | -0.64911 |
| H | -0.68848 | -2.70983 | -1.96189 |
| O | 0.61523  | -1.08089 | 0.39876  |
| N | 1.63875  | -2.21726 | -1.30744 |
| C | 1.47991  | -2.65668 | -2.20156 |
| H | 2.98128  | -2.19095 | -0.88171 |
| C | 3.44831  | -1.38738 | 0.16385  |
| C | 3.88187  | -3.00668 | -1.57432 |
| C | 4.79616  | -1.41925 | 0.50494  |
| H | 2.76786  | -0.74415 | 0.70222  |
| C | 5.22761  | -3.02949 | -1.23818 |
| H | 3.52573  | -3.63734 | -2.38478 |
| C | 5.67870  | -2.23399 | -0.19187 |
| C | -5.29050 | -2.89144 | 0.33066  |
| C | -5.67881 | -2.65747 | 1.80010  |
| H | -6.01539 | -1.63044 | 1.96737  |
| H | -4.82633 | -2.84415 | 2.45990  |
| H | -6.49338 | -3.33054 | 2.08809  |
| C | -4.88474 | -4.35933 | 0.16645  |
| H | -4.03909 | -4.61903 | 0.81115  |
| H | -4.61619 | -4.58836 | -0.87004 |
| H | -5.72440 | -5.00359 | -0.44291 |
| C | -6.50977 | -2.62457 | -0.56739 |

|    |          |          |          |   |          |          |          |
|----|----------|----------|----------|---|----------|----------|----------|
| H  | -6.25850 | -2.78203 | -1.62066 | C | 0.54867  | -1.69440 | -0.64201 |
| H  | -6.87555 | -1.59999 | -0.45716 | H | -0.67766 | -2.70502 | -1.95527 |
| H  | -7.32828 | -3.30233 | -0.30307 | O | 0.61370  | -1.06608 | 0.40483  |
| H  | 5.16171  | -0.79653 | 1.31374  | N | 1.64583  | -2.20497 | -1.29513 |
| H  | 5.92080  | -3.66288 | -1.77975 | H | 1.49080  | -2.63811 | -2.19300 |
| Cl | 7.36648  | -2.25935 | 0.24495  | C | 2.98693  | -2.18070 | -0.86520 |
| C  | -0.19364 | 2.78197  | -1.79794 | C | 3.44731  | -1.40180 | 0.20175  |
| C  | 0.51233  | 2.04928  | -2.75183 | C | 3.89326  | -2.97521 | -1.57504 |
| C  | 0.01762  | 4.16000  | -1.69373 | C | 4.79443  | -1.43644 | 0.54567  |
| C  | 1.41491  | 2.69152  | -3.59639 | H | 2.76248  | -0.77527 | 0.75400  |
| H  | 0.35382  | 0.97976  | -2.82738 | C | 5.23796  | -3.00107 | -1.23531 |
| C  | 0.91906  | 4.79495  | -2.53979 | H | 3.54279  | -3.58638 | -2.40276 |
| H  | -0.51048 | 4.72363  | -0.93038 | C | 5.68271  | -2.22975 | -0.16838 |
| C  | 1.62007  | 4.06324  | -3.49559 | C | -5.24035 | -2.93190 | 0.30144  |
| H  | 1.96166  | 2.11377  | -4.33523 | C | -4.76049 | -3.76241 | 1.50355  |
| H  | 1.07885  | 5.86440  | -2.44681 | H | -4.57048 | -3.11825 | 2.36706  |
| H  | 2.32563  | 4.55945  | -4.15435 | H | -3.83653 | -4.30227 | 1.27647  |
| H  | 1.24724  | 4.02175  | 4.65264  | H | -5.52113 | -4.49952 | 1.78216  |
| O  | -1.08066 | 0.70641  | -1.07546 | C | -5.49734 | -3.86550 | -0.89270 |
| H  | -4.65785 | 2.04649  | -0.62086 | H | -4.59624 | -4.41857 | -1.17366 |
| H  | -3.53484 | 2.25522  | 0.72038  | H | -5.83127 | -3.29653 | -1.76560 |

### Conformation 16: $\Delta G$ : 4.785343521

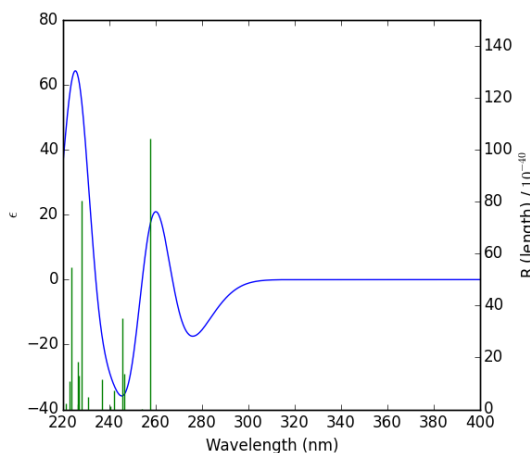

|   |          |          |          |
|---|----------|----------|----------|
| C | -4.36619 | -0.53523 | -0.02746 |
| C | -3.36784 | 0.38732  | -0.35461 |
| C | -2.11410 | -0.08663 | -0.73435 |
| C | -1.88355 | -1.46988 | -0.80034 |
| C | -2.89451 | -2.35673 | -0.46601 |
| C | -4.16159 | -1.91129 | -0.06902 |
| H | -5.33456 | -0.13567 | 0.25753  |
| H | -2.67458 | -3.42035 | -0.51409 |
| C | -1.20852 | 2.12684  | -0.90534 |
| C | -2.62507 | 2.58450  | -1.25806 |
| H | -2.68229 | 3.66539  | -1.12502 |
| H | -2.79570 | 2.35066  | -2.31433 |
| C | -3.63746 | 1.87230  | -0.36580 |
| C | -0.90361 | 2.51124  | 0.56975  |
| O | -1.34581 | 3.54958  | 1.01878  |
| N | -0.10621 | 1.61400  | 1.21628  |
| H | 0.07605  | 0.73223  | 0.74054  |
| C | 0.42405  | 1.73216  | 2.50977  |
| C | 0.83760  | 0.55338  | 3.15237  |
| C | 1.06266  | 3.01914  | 4.27105  |
| C | 1.39356  | 0.66451  | 4.41531  |
| H | 0.71303  | -0.40388 | 2.65798  |
| C | 1.50891  | 1.92480  | 5.00045  |
| H | 1.72558  | -0.22452 | 4.94277  |
| H | 1.93355  | 2.05625  | 5.98886  |
| N | 0.53795  | 2.94124  | 3.04630  |
| N | -0.63916 | -1.95257 | -1.28440 |

|    |          |          |          |
|----|----------|----------|----------|
| H  | -6.27220 | -4.59689 | -0.64027 |
| C  | -6.56182 | -2.25575 | 0.67790  |
| H  | -6.96119 | -1.66396 | -0.15181 |
| H  | -6.44464 | -1.60054 | 1.54655  |
| H  | -7.30336 | -3.01880 | 0.93245  |
| H  | 5.15470  | -0.83292 | 1.37122  |
| H  | 5.93526  | -3.61790 | -1.79052 |
| Cl | 7.36929  | -2.25834 | 0.27273  |
| C  | -0.16843 | 2.79353  | -1.79652 |
| C  | 0.55825  | 2.06202  | -2.73558 |
| C  | 0.04096  | 4.17130  | -1.68548 |
| C  | 1.47949  | 2.70522  | -3.55899 |
| H  | 0.40111  | 0.99264  | -2.81599 |
| C  | 0.96115  | 4.80721  | -2.51028 |
| H  | -0.50389 | 4.73409  | -0.93332 |
| C  | 1.68282  | 4.07672  | -3.45155 |
| H  | 2.04239  | 2.12823  | -4.28622 |
| H  | 1.11932  | 5.87643  | -2.41203 |
| H  | 2.40300  | 4.57377  | -4.09360 |
| H  | 1.13705  | 4.02234  | 4.68523  |
| O  | -1.07406 | 0.71769  | -1.09689 |
| H  | -4.65641 | 2.05417  | -0.72099 |
| H  | -3.57143 | 2.28255  | 0.64812  |

1. R. B. Gaussian 09, M. J. Frisch, G. W. Trucks, H. B. Schlegel, G. E. Scuseria, M. A. Robb, J. R. Cheeseman, G. Scalmani, V. Barone, B. Mennucci, G. A. Petersson, H. Nakatsuji, M. Caricato, X. Li, H. P. Hratchian, A. F. Izmaylov, J. Bloino, G. Zheng, J. L. Sonnenberg, M. Hada, M. Ehara, K. Toyota, R. Fukuda, J. Hasegawa, M. Ishida, T. Nakajima, Y. Honda, O. Kitao, H. Nakai, T. Vreven, J. Montgomery, J. A., J. E. Peralta, F. Ogliaro, M. Bearpark, J. J. Heyd, E. Brothers, K. N. Kudin, V. N. Staroverov, R. Kobayashi, J. Normand, K. Raghavachari, A. Rendell, J. C. Burant, S. S. Iyengar, J. Tomasi, M. Cossi, N. Rega, N. J. Millam, M. Klene, J. E. Knox, J. B. Cross, V. Bakken, C. Adamo, J. Jaramillo, R. Gomperts, R. E. Stratmann, O. Yazyev, A. J. Austin, R. Cammi, C. Pomelli, J. W. Ochterski, R. L. Martin, K. Morokuma, V. G. Zakrzewski, G. A. Voth, P. Salvador, J. J. Dannenberg, S. Dapprich, A. D. Daniels, Ö. Farkas, J. B. Foresman, J. V. Ortiz, J. Cioslowski and D. J. Fox, *Journal*, 2009.
2. H. Zhao and D. G. Truhlar, *Theor Chem Acta*, 2007, **120**, 215-241.
3. R. Krishnan, J. S. Binkley, R. Seeger and J. A. Pople, *J. Chem. Phys.*, 1980, **72**, 650-654.
4. (a) S. Grimme, *Chem.--Eur. J.*, 2012, **18**, 9955-9964; (b) R. Paton.
5. A. V. Marenich, C. J. Cramer and D. G. Truhlar, *The Journal of Physical Chemistry B*, 2009, **113**, 6378-6396.
6. H. L. Schmider and A. D. Becke, *J. Chem. Phys.*, 1998, **109**, 8188-8199.
7. N. M. O'Boyle, A. L. Tenderholt and K. M. Langner, *J. Comput. Chem.*, 2008, **29**, 839-845.
